# Supplementary material for: The Importance of Mg2+‐Free State in Nucleotide Exchange of Oncogenic K‐Ras Mutants
Source: PubMed Central journal article supplement — Chemistry. 2022 Sep 1;28(59):e202201449. doi: 10.1002/chem.202201449 (PMC9804424; doi:10.1002/chem.202201449), 2022-09-01
Supplement: CHEM-28-0-s001.pdf [file CHEM-28-0-s001.pdf]

# Chemistry–A European Journal

Supporting Information

## **The Importance of $Mg^{2+}$ -Free State in Nucleotide Exchange of Oncogenic K-Ras Mutants**

Gyula Pálffy, Dóra K. Menyhárd, Hanna Ákontz-Kiss, István Vida, Gyula Batta, Orsolya Tőke, and András Perczel\*

## Resonance Assignment and Fast dynamics of GDP- and GTP-bound G12V K-Ras·Mg<sup>2+</sup>

We have previously carried out the backbone resonance assignment of GDP- and GTP-bound wt, G12C, and G12D K-Ras·Mg<sup>2+</sup> as well as that of GDP-bound G12V K-Ras·Mg<sup>2+</sup>.<sup>[1,2]</sup> To complete these data, we determined the resonance assignment of G12V K-Ras·Mg<sup>2+</sup>·GTP (Fig. S2). Resonance assignment of the GTP-bound form was accomplished based on the assignment of GTP-bound K-Ras-wt, G12C, and G12D mutants<sup>[2]</sup> complemented by 3D <sup>15</sup>N NOESY-HSQC measurements. Similarly to the other three variants, ~79% of non-proline residues were successfully assigned (Fig. S2). Unassigned residues are mostly found in switch-I (D30, E31, D33, I36-D38) and switch-II (D54-R73) regions and as reported earlier,<sup>[3]</sup> can likely be attributed to signal broadening arising from intrinsic conformational exchange on intermediate timescales.

To characterize the ps-ns dynamics of G12V K-Ras·Mg<sup>2+</sup> and compare it with the previously investigated wild-type form and the G12C and G12D variants,<sup>[2]</sup> <sup>15</sup>N  $R_1$ ,  $R_2$ , and <sup>15</sup>N-{<sup>1</sup>H} HetNOE parameters were analyzed using the Lipari-Szabo model-free formalism and reduced spectral density mapping. General trends of both the GDP- and GTP-bound forms of G12V are similar to the other variants (Fig. S3, Table S1). Notably, the relaxation parameters have larger standard deviations in the GTP-bound form indicating that GTP-bound G12V K-Ras is dynamically more heterogeneous than its GDP-bound state. The GTP-bound form showed the largest average  $R_2/R_1$  ratio and global correlation time ( $\tau_c$ ) among the investigated variants (12.8 ns vs. 12.0-12.6 ns for the others).

Parameters derived from Lipari-Szabo model-free analysis ( $S^2$ ,  $R_{ex}$ ,  $\tau_e$ ) and reduced spectral density mapping ( $J(0)$ ,  $J(\omega_N)$ ,  $J(\omega_H)$ ) of the G12V mutant are in the same range and exhibit similar trends as the three other variants in both the GDP- and the GTP-bound states. Differences in the GDP-bound state in comparison to wt include a slight increase in  $S^2$  in L3 (G48, T50), at the end of  $\alpha 3$  (I100, K104), as well as in the mobile loop between  $\beta 5$  and  $\alpha 4$  (L120, S122, V126, T127). The observed rigidification near the C-terminal end of  $\alpha 3$  is similar to that found in G12C but differs markedly from G12D. An additional difference between G12V and the two other investigated mutants is observed in the switch-II region (E62) and in the middle of  $\alpha 3$  (I93). While in G12C and G12D a significant rigidification is observed at these positions, the valine mutant exhibits a slight decrease in  $S^2$ . Moreover, unlike in G12D, where the switch-I region displays a decrease in ps-ns flexibility, G12V behaves similar to wt. However, together with the P-loop, positions in  $\beta 2$  and  $\beta 3$  (e.g. Q43, I46, D54, A56), the L79-V81 segment of  $\beta 4$ , and two proximate segments of the allosteric lobe (L113-D119, S145-K147), the switch-I region exhibits a contribution from  $\mu$ s-ms motions, which appears to be more pronounced than in wt or the two other mutants. Among the affected residues in switch-I, similarly to the other investigated variants, E37 has the largest  $R_2$  and  $R_{ex}$  values in the entire protein (23.35 s<sup>-1</sup> and 7.04 s<sup>-1</sup>, respectively). Motions of Y32 and D38 are more complex with contribution from both fast ( $\tau_e$ ) and slow ( $R_{ex}$ ) motions. Similar to our investigation of wt, G12C, and G12D,<sup>[2]</sup> Y32 has an extremely low HetNOE (0.39 vs. switch-I average of 0.77) and high  $J(\omega_H)$  (9.54 ps rad<sup>-1</sup> vs. switch-I average of 3.37 ps rad<sup>-1</sup>) value in GDP-bound G12V as well highlighting its flexibility in contrast to the surrounding switch-I residues. Remarkably, in the GTP-bound state it becomes rigid, characterized by increased HetNOE (0.91) and decreased  $J(\omega_H)$  (1.11 ps rad<sup>-1</sup>) values. The significant difference in the mobility of Y32 between the GDP- and GTP-bound forms of G12V is consistent with our suggestion for its role in GTP-autohydrolysis.<sup>[2]</sup> Unfortunately, severe line broadening obscures the analysis in most of switch-I and nearly the entire switch-II in the GTP-bound state. Motions on the ps-ns timescale in the rest of the protein are highly similar to wt and the two other variants. This includes a pronounced contribution of fast local motions in L7 (D105-V109) as well as in the L8/ $\alpha 4$ -region (S122-Q129). Regarding the P-loop, unlike in the GDP-bound form, no significant contribution from slow motions is indicated by model-free. While G13 shows a contribution from ps motions, dynamics of the rest of the P-loop can be described by  $S^2$  alone.

## Supplementary tables

**Table S1.** Averaged relaxation parameters determined for K-Ras-G12V in its nucleotide- and cofactor-bound forms as well as for Mg<sup>2+</sup>-free K-Ras-G12C-GDP. Additional dynamic properties derived from the Lipari–Szabo model-free and reduced spectral density analysis (global correlation time,  $\tau_c$ ; generalized order parameter,  $S^2$ ; spectral density function of fast motions,  $J(\omega_n)$ ) are listed.

|                                    | K-Ras-G12V·Mg <sup>2+</sup> ·GTP |              | K-Ras-G12V·Mg <sup>2+</sup> ·GDP |              | Mg <sup>2+</sup> -free K-Ras-G12C·GDP |              |
|------------------------------------|----------------------------------|--------------|----------------------------------|--------------|---------------------------------------|--------------|
|                                    | average                          | min. → max.  | average                          | min. → max.  | average                               | min. → max.  |
| $R_1 / \text{s}^{-1}$              | 0.80 ± 0.07                      | 0.67 → 1.25  | 0.90 ± 0.06                      | 0.82 → 1.13  | 0.96 ± 0.08                           | 0.84 → 1.26  |
| $R_2 / \text{s}^{-1}$              | 17.83 ± 2.90                     | 5.65 → 24.78 | 15.97 ± 2.05                     | 8.14 → 23.35 | 14.09 ± 2.03                          | 5.90 → 22.87 |
| $R_2 / R_1$                        | 22.54 ± 4.29                     | 4.51 → 31.50 | 17.77 ± 2.51                     | 8.82 → 24.73 | 14.80 ± 2.47                          | 4.77 → 20.32 |
| HetNOE                             | 0.76 ± 0.13                      | 0.05 → 0.91  | 0.79 ± 0.10                      | 0.38 → 0.91  | 0.77 ± 0.12                           | 0.05 → 0.92  |
| $\tau_c / \text{ns}$               | 12.81                            | -            | 11.14                            | -            | 10.40                                 | -            |
| $S^2$                              | 0.84 ± 0.08                      | 0.52 → 0.99  | 0.85 ± 0.06                      | 0.52 → 0.93  | 0.82 ± 0.09                           | 0.49 → 1     |
| $J(\omega_n) / \text{ps rad}^{-1}$ | 3.13 ± 2.21                      | 1.11 → 16.78 | 2.98 ± 1.82                      | 0.94 → 16.99 | 3.60 ± 2.26                           | 1.13 → 18.35 |

**Table S2** Experimental fast dynamics parameters ( $R_1$ ,  $R_2$ ,  $R_2/R_1$  and  $^{15}\text{N}\{-^1\text{H}\}$  HetNOE) of K-Ras-G12V·Mg<sup>2+</sup> bound to GTP and GDP recorded at 700 MHz at 298 K. P-loop (red), switch-I (orange) and switch-II (blue) are colored.

| Res. | K-Ras-G12V-GTP                  |                       |             |                                    | K-Ras-G12V-GDP        |                                 |             |                                    |
|------|---------------------------------|-----------------------|-------------|------------------------------------|-----------------------|---------------------------------|-------------|------------------------------------|
|      | $R_1 / \text{s}^{-1}$           | $R_2 / \text{s}^{-1}$ | $R_2 / R_1$ | $^{15}\text{N}\{-^1\text{H}\}$ NOE | $R_1 / \text{s}^{-1}$ | $R_2 / \text{s}^{-1}$           | $R_2 / R_1$ | $^{15}\text{N}\{-^1\text{H}\}$ NOE |
| M1   | 1.04 ± 0.04                     | 6.8 ± 0.2             | 6.5 ± 0.3   | 0.05                               | 0.92 ± 0.02           | 8.1 ± 0.6                       | 8.8 ± 0.6   | 0.44                               |
| T2   | 1.02 ± 0.03                     | 11.2 ± 0.3            | 11.0 ± 0.4  | 0.48                               | 1.05 ± 0.01           | 10.3 ± 0.3                      | 9.8 ± 0.3   | 0.52                               |
| E3   | 0.81 ± 0.01                     | 17.6 ± 1.0            | 21.6 ± 1.2  | 0.72                               | 0.93 ± 0.01           | 16.4 ± 0.3                      | 17.6 ± 0.4  | 0.76                               |
| Y4   | 0.76 ± 0.02                     | 14.0 ± 0.6            | 18.3 ± 0.9  | 0.56                               | 0.88 ± 0.01           | 14.0 ± 0.2                      | 15.8 ± 0.2  | 0.80                               |
| K5   | overlapping peaks               |                       |             |                                    | 0.85 ± 0.01           | 14.9 ± 0.1                      | 17.6 ± 0.2  | 0.81                               |
| L6   | 0.81 ± 0.02                     | 17.3 ± 1.3            | 21.5 ± 1.7  | 0.85                               | 0.90 ± 0.01           | 17.2 ± 0.3                      | 19.2 ± 0.4  | 0.83                               |
| V7   | 0.89 ± 0.12                     | 16.3 ± 0.8            | 18.3 ± 2.6  | 0.73                               | overlapping peaks     |                                 |             |                                    |
| V8   | N/A                             | N/A                   | N/A         | N/A                                | 0.907 ± 0.003         | 18.9 ± 0.2                      | 20.9 ± 0.2  | 0.83                               |
| V9   | 0.78 ± 0.01                     | 18.7 ± 1.2            | 23.8 ± 1.6  | 0.86                               | 0.89 ± 0.01           | 15.1 ± 0.4                      | 17.0 ± 0.5  | 0.82                               |
| G10  | 0.79 ± 0.07                     | 24.8 ± 5.9            | 31.3 ± 8.0  | 0.84                               | 0.91 ± 0.01           | 17.5 ± 0.8                      | 19.3 ± 0.9  | 0.83                               |
| A11  | N/A                             | N/A                   | N/A         | N/A                                | 0.86 ± 0.01           | 14.4 ± 0.1                      | 16.8 ± 0.2  | 0.86                               |
| V12  | 0.76 ± 0.03                     | 19.1 ± 0.5            | 25.3 ± 1.3  | 0.81                               | overlapping peaks     |                                 |             |                                    |
| G13  | 0.82 ± 0.05                     | 16.0 ± 1.5            | 19.6 ± 2.2  | 0.66                               | 0.86 ± 0.01           | 16.8 ± 0.2                      | 19.5 ± 0.4  | 0.84                               |
| V14  | 0.83 ± 0.02                     | 18.4 ± 1.2            | 22.2 ± 1.6  | 0.83                               | 0.94 ± 0.02           | 15.6 ± 0.2                      | 16.5 ± 0.4  | 0.91                               |
| G15  | 0.88 ± 0.03                     | 17.9 ± 2.1            | 20.3 ± 2.5  | 0.81                               | 0.95 ± 0.02           | 18.2 ± 0.1                      | 19.2 ± 0.5  | 0.90                               |
| K16  | 0.79 ± 0.07                     | 18.2 ± 6.6            | 22.9 ± 8.6  | 0.77                               | 0.87 ± 0.02           | 17.0 ± 0.5                      | 19.5 ± 0.6  | 0.89                               |
| S17  | 0.87 ± 0.07                     | 19.2 ± 3.9            | 22.1 ± 4.7  | 0.81                               | 0.87 ± 0.01           | 16.5 ± 0.1                      | 19.0 ± 0.3  | 0.87                               |
| A18  | 0.71 ± 0.03                     | 17.8 ± 1.1            | 25.0 ± 1.9  | 0.68                               | 0.87 ± 0.03           | 17.4 ± 0.4                      | 19.9 ± 0.9  | 0.82                               |
| L19  | 0.81 ± 0.03                     | 19.9 ± 0.7            | 24.4 ± 1.2  | 0.82                               | 0.90 ± 0.01           | 15.7 ± 0.1                      | 17.5 ± 0.2  | 0.91                               |
| T20  | 0.81 ± 0.04                     | 22.3 ± 2.7            | 27.4 ± 3.6  | 0.77                               | 0.91 ± 0.02           | 15.7 ± 0.4                      | 17.2 ± 0.6  | 0.86                               |
| I21  | 0.76 ± 0.11                     | 22.4 ± 3.5            | 29.7 ± 6.2  | 0.72                               | 0.89 ± 0.03           | 16.9 ± 0.1                      | 18.9 ± 0.5  | 0.82                               |
| Q22  | N/A                             | N/A                   | N/A         | N/A                                | 0.91 ± 0.03           | 16.5 ± 0.3                      | 18 ± 0.7    | 0.80                               |
| L23  | 0.76 ± 0.07                     | 18.3 ± 1.3            | 24.2 ± 3.0  | 0.86                               | 0.91 ± 0.02           | 16.3 ± 0.2                      | 17.9 ± 0.5  | 0.86                               |
| I24  | 0.72 ± 0.03                     | 21.4 ± 1.7            | 29.9 ± 2.6  | 0.71                               | 0.88 ± 0.03           | 16.1 ± 0.2                      | 18.3 ± 0.7  | 0.81                               |
| Q25  | 0.67 ± 0.05                     | 21.0 ± 1.7            | 31.5 ± 3.4  | 0.89                               | 0.87 ± 0.01           | 16.2 ± 0.1                      | 18.7 ± 0.4  | 0.80                               |
| N26  | 0.79 ± 0.03                     | 19.2 ± 0.8            | 24.4 ± 1.3  | 0.78                               | 0.88 ± 0.01           | 15.5 ± 0.2                      | 17.6 ± 0.4  | 0.87                               |
| H27  | 0.79 ± 0.03                     | 17.1 ± 1.2            | 21.8 ± 1.7  | 0.69                               | 0.92 ± 0.01           | not fitted T <sub>2</sub> curve |             | 0.78                               |
| F28  | overlapping peaks               |                       |             |                                    | 0.90 ± 0.03           | 14.3 ± 0.2                      | 15.8 ± 0.6  | 0.84                               |
| V29  | 0.84 ± 0.17                     | 11.3 ± 4.1            | 13.5 ± 5.7  | 0.68                               | 0.89 ± 0.04           | 18.9 ± 0.5                      | 21.3 ± 1.1  | 0.82                               |
| D30  | N/A                             | N/A                   | N/A         | N/A                                | 1.09 ± 0.02           | 14.6 ± 0.3                      | 13.4 ± 0.3  | 0.75                               |
| E31  | N/A                             | N/A                   | N/A         | N/A                                | overlapping peaks     |                                 |             |                                    |
| Y32  | 0.81 ± 0.05                     | 23.4 ± 3.8            | 28.9 ± 5.0  | 0.91                               | 0.99 ± 0.03           | 16.5 ± 0.3                      | 16.7 ± 0.5  | 0.38                               |
| D33  | N/A                             | N/A                   | N/A         | N/A                                | 0.85 ± 0.03           | 18.5 ± 0.2                      | 21.8 ± 0.8  | 0.76                               |
| P34  | N/A                             | N/A                   | N/A         | N/A                                | N/A                   | N/A                             | N/A         | N/A                                |
| T35  | low intensity peak (not fitted) |                       |             |                                    | 0.92 ± 0.03           | 18.6 ± 0.3                      | 20.2 ± 0.7  | 0.80                               |
| I36  | N/A                             | N/A                   | N/A         | N/A                                | 0.90 ± 0.03           | 16.9 ± 0.1                      | 18.7 ± 0.6  | 0.82                               |
| E37  | N/A                             | N/A                   | N/A         | N/A                                | 0.94 ± 0.01           | 23.4 ± 1.7                      | 24.7 ± 1.8  | 0.79                               |
| D38  | N/A                             | N/A                   | N/A         | N/A                                | 0.89 ± 0.02           | 17.1 ± 0.2                      | 19.1 ± 0.5  | 0.75                               |
| S39  | 0.73 ± 0.04                     | 16.4 ± 1.5            | 22.3 ± 2.4  | 0.76                               | 0.88 ± 0.02           | 14.9 ± 0.3                      | 17.0 ± 0.4  | 0.76                               |
| Y40  | overlapping peaks               |                       |             |                                    | 0.86 ± 0.01           | 14.9 ± 0.3                      | 17.4 ± 0.4  | 0.82                               |
| R41  | overlapping peaks               |                       |             |                                    | 0.89 ± 0.01           | 14.5 ± 0.1                      | 16.2 ± 0.2  | 0.74                               |
| K42  | 0.79 ± 0.01                     | 14.7 ± 0.5            | 18.7 ± 0.7  | 0.71                               | 0.88 ± 0.01           | 14.4 ± 0.2                      | 16.4 ± 0.3  | 0.76                               |

|     |                   |            |            |      |                   |            |            |      |
|-----|-------------------|------------|------------|------|-------------------|------------|------------|------|
| Q43 | 0.81 ± 0.03       | 19.4 ± 0.3 | 24 ± 1.1   | 0.76 | 0.92 ± 0.01       | 17.4 ± 0.2 | 18.9 ± 0.4 | 0.76 |
| V44 | overlapping peaks |            |            |      | 0.91 ± 0.01       | 14.8 ± 0.2 | 16.2 ± 0.2 | 0.81 |
| V45 | 0.83 ± 0.05       | 14.4 ± 0.2 | 17.4 ± 1.1 | 0.77 | 0.889 ± 0.004     | 12.7 ± 0.2 | 14.3 ± 0.3 | 0.76 |
| I46 | 0.72 ± 0.05       | 17.0 ± 0.8 | 23.6 ± 1.9 | 0.67 | 0.82 ± 0.01       | 16.6 ± 0.5 | 20.2 ± 0.6 | 0.80 |
| D47 | 0.76 ± 0.04       | 18.7 ± 4.1 | 24.6 ± 5.6 | 0.83 | 0.90 ± 0.05       | 16.5 ± 0.7 | 18.4 ± 1.3 | 0.79 |
| G48 | 0.77 ± 0.05       | 17.4 ± 0.4 | 22.6 ± 1.4 | 0.80 | 0.88 ± 0.04       | 14.9 ± 0.4 | 16.9 ± 1.0 | 0.80 |
| E49 | 0.76 ± 0.01       | 16.9 ± 0.2 | 22.2 ± 0.5 | 0.82 | 0.89 ± 0.01       | 15.3 ± 0.1 | 17.3 ± 0.3 | 0.78 |
| T50 | 0.78 ± 0.02       | 17.0 ± 0.7 | 21.7 ± 1.1 | 0.75 | 0.89 ± 0.03       | 16.1 ± 0.2 | 18 ± 0.6   | 0.76 |
| C51 | 0.81 ± 0.05       | 17.0 ± 0.6 | 21.0 ± 1.5 | 0.82 | 0.96 ± 0.01       | 15.5 ± 0.2 | 16.1 ± 0.3 | 0.78 |
| L52 | 0.79 ± 0.03       | 16.7 ± 0.9 | 21.0 ± 1.4 | 0.89 | 0.90 ± 0.01       | 14.3 ± 0.2 | 15.8 ± 0.3 | 0.78 |
| L53 | overlapping peaks |            |            |      | 0.89 ± 0.01       | 14.0 ± 0.2 | 15.7 ± 0.3 | 0.83 |
| D54 | N/A               | N/A        | N/A        | N/A  | 0.89 ± 0.01       | 16.3 ± 0.2 | 18.3 ± 0.3 | 0.80 |
| I55 | N/A               | N/A        | N/A        | N/A  | 0.86 ± 0.01       | 14.2 ± 0.3 | 16.6 ± 0.3 | 0.83 |
| L56 | N/A               | N/A        | N/A        | N/A  | 0.89 ± 0.02       | 18.9 ± 0.2 | 21.3 ± 0.5 | 0.82 |
| D57 | N/A               | N/A        | N/A        | N/A  | 0.89 ± 0.01       | 19.5 ± 0.4 | 21.9 ± 0.5 | 0.83 |
| T58 | N/A               | N/A        | N/A        | N/A  | 0.83 ± 0.01       | 19.0 ± 0.6 | 23.0 ± 0.8 | 0.82 |
| A59 | N/A               | N/A        | N/A        | N/A  | 0.86 ± 0.02       | 15.7 ± 0.6 | 18.3 ± 0.8 | 0.73 |
| G60 | N/A               | N/A        | N/A        | N/A  | 1.13 ± 0.03       | 12.3 ± 0.4 | 10.9 ± 0.4 | 0.62 |
| Q61 | N/A               | N/A        | N/A        | N/A  | overlapping peaks |            |            |      |
| E62 | N/A               | N/A        | N/A        | N/A  | 1.07 ± 0.03       | 12.9 ± 0.7 | 12 ± 0.7   | 0.57 |
| E63 | N/A               | N/A        | N/A        | N/A  | overlapping peaks |            |            |      |
| Y64 | N/A               | N/A        | N/A        | N/A  | 1.01 ± 0.01       | 16.3 ± 0.4 | 16.1 ± 0.5 | 0.60 |
| S65 | N/A               | N/A        | N/A        | N/A  | overlapping peaks |            |            |      |
| A66 | N/A               | N/A        | N/A        | N/A  | 0.98 ± 0.04       | 20.1 ± 0.2 | 20.5 ± 0.8 | 0.78 |
| M67 | N/A               | N/A        | N/A        | N/A  | 0.96 ± 0.04       | 15.4 ± 0.5 | 16.0 ± 0.8 | 0.72 |
| R68 | N/A               | N/A        | N/A        | N/A  | 0.97 ± 0.02       | 15.6 ± 0.5 | 16.0 ± 0.6 | 0.85 |
| D69 | N/A               | N/A        | N/A        | N/A  | 0.96 ± 0.01       | 16.4 ± 0.2 | 17.1 ± 0.3 | 0.78 |
| Q70 | N/A               | N/A        | N/A        | N/A  | 0.90 ± 0.02       | 16.4 ± 0.1 | 18.2 ± 0.4 | 0.78 |
| Y71 | N/A               | N/A        | N/A        | N/A  | overlapping peaks |            |            |      |
| M72 | N/A               | N/A        | N/A        | N/A  | overlapping peaks |            |            |      |
| R73 | N/A               | N/A        | N/A        | N/A  | 0.88 ± 0.02       | 17.2 ± 0.4 | 19.5 ± 0.6 | 0.76 |
| T74 | 0.82 ± 0.11       | 18.4 ± 2.4 | 22.4 ± 4.3 | 0.67 | 0.93 ± 0.01       | 18.6 ± 0.3 | 20.0 ± 0.4 | 0.80 |
| G75 | 0.87 ± 0.01       | 21.3 ± 0.4 | 24.6 ± 0.6 | 0.71 | 0.92 ± 0.01       | 19.0 ± 0.8 | 20.7 ± 0.9 | 0.84 |
| E76 | overlapping peaks |            |            |      | 0.90 ± 0.02       | 14.5 ± 0.1 | 16.2 ± 0.4 | 0.80 |
| G77 | 0.74 ± 0.01       | 16.4 ± 2.0 | 22.1 ± 2.7 | 0.77 | 0.85 ± 0.01       | 13.3 ± 0.4 | 15.7 ± 0.5 | 0.80 |
| F78 | 0.81 ± 0.03       | 19.9 ± 2.1 | 24.6 ± 2.7 | 0.84 | 0.88 ± 0.02       | 15.1 ± 0.2 | 17.2 ± 0.4 | 0.83 |
| L79 | 0.88 ± 0.07       | 21.0 ± 4.1 | 23.9 ± 5.0 | 0.86 | 0.90 ± 0.01       | 16.9 ± 0.3 | 18.6 ± 0.4 | 0.86 |
| C80 | 0.68 ± 0.01       | 17.4 ± 0.5 | 25.7 ± 0.9 | 0.79 | 0.83 ± 0.01       | 15.6 ± 0.2 | 18.7 ± 0.3 | 0.79 |
| V81 | 0.76 ± 0.04       | 20.9 ± 2.5 | 27.4 ± 3.5 | 0.77 | 0.87 ± 0.01       | 16.6 ± 0.1 | 19.0 ± 0.3 | 0.81 |
| F82 | 0.81 ± 0.01       | 16.2 ± 0.7 | 20.0 ± 0.9 | 0.81 | 0.92 ± 0.01       | 15.1 ± 0.3 | 16.5 ± 0.4 | 0.84 |
| A83 | overlapping peaks |            |            |      | 0.90 ± 0.02       | 15.1 ± 0.3 | 16.8 ± 0.5 | 0.83 |
| I84 | 0.77 ± 0.01       | 15.8 ± 0.4 | 20.5 ± 0.5 | 0.79 | 0.86 ± 0.02       | 15.7 ± 0.3 | 18.3 ± 0.5 | 0.83 |
| N85 | overlapping peaks |            |            |      | 0.93 ± 0.01       | 17.7 ± 0.2 | 19.1 ± 0.3 | 0.83 |
| N86 | 0.8 ± 0.02        | 13.9 ± 0.4 | 17.3 ± 0.7 | 0.83 | 0.89 ± 0.03       | 16.7 ± 0.3 | 18.7 ± 0.7 | 0.80 |
| T87 | N/A               | N/A        | N/A        | N/A  | N/A               | N/A        | N/A        | N/A  |
| K88 | 0.84 ± 0.02       | 17.0 ± 0.7 | 20.3 ± 1.0 | 0.79 | 0.94 ± 0.01       | 15.1 ± 0.3 | 16.1 ± 0.4 | 0.82 |

|      |                   |            |            |      |                   |              |            |      |
|------|-------------------|------------|------------|------|-------------------|--------------|------------|------|
| S89  | 0.75 ± 0.02       | 17.9 ± 0.8 | 24.0 ± 1.2 | 0.80 | 0.86 ± 0.01       | 16.0 ± 0.4   | 18.7 ± 0.5 | 0.85 |
| F90  | 0.80 ± 0.02       | 22.4 ± 0.9 | 28.1 ± 1.2 | 0.70 | 0.89 ± 0.01       | 17.8 ± 0.1   | 19.9 ± 0.3 | 0.87 |
| E91  | 0.76 ± 0.02       | 18.1 ± 0.6 | 23.8 ± 1.1 | 0.75 | 0.88 ± 0.03       | 14.9 ± 0.1   | 16.9 ± 0.6 | 0.85 |
| D92  | 0.78 ± 0.04       | 19.9 ± 1.5 | 25.6 ± 2.4 | 0.86 | 0.89 ± 0.01       | 16.2 ± 0.3   | 18.1 ± 0.5 | 0.87 |
| I93  | 0.76 ± 0.04       | 17.9 ± 2.2 | 23.5 ± 3.2 | 0.82 | 0.9 ± 0.01        | 17.4 ± 0.5   | 19.3 ± 0.6 | 0.93 |
| H94  | 0.81 ± 0.04       | 19.4 ± 1.7 | 23.9 ± 2.4 | 0.78 | 0.89 ± 0.01       | 17.2 ± 0.5   | 19.2 ± 0.6 | 0.90 |
| H95  | 0.81 ± 0.05       | 21.5 ± 0.9 | 26.5 ± 2.0 | 0.74 | 0.91 ± 0.01       | 15.9 ± 0.2   | 17.5 ± 0.4 | 0.87 |
| Y96  | 0.76 ± 0.06       | 19.6 ± 0.7 | 25.7 ± 2.1 | 0.75 | 0.86 ± 0.02       | 16.3 ± 0.2   | 19.0 ± 0.6 | 0.70 |
| R97  | overlapping peaks |            |            |      | 0.87 ± 0.01       | 16.4 ± 0.3   | 18.8 ± 0.4 | 0.79 |
| E98  | 0.83 ± 0.02       | 19.9 ± 0.6 | 24 ± 0.9   | 0.81 | overlapping peaks |              |            |      |
| Q99  | overlapping peaks |            |            |      | overlapping peaks |              |            |      |
| I100 | 0.79 ± 0.06       | 18.4 ± 0.4 | 23.3 ± 1.9 | 0.74 | 0.89 ± 0.02       | 16.4 ± 0.2   | 18.4 ± 0.5 | 0.84 |
| K101 | overlapping peaks |            |            |      | 0.90 ± 0.02       | 16.4 ± 0.1   | 18.2 ± 0.3 | 0.78 |
| R102 | 0.78 ± 0.03       | 17.9 ± 0.5 | 23 ± 1.2   | 0.82 | 0.91 ± 0.01       | 17.1 ± 0.2   | 18.8 ± 0.2 | 0.77 |
| V103 | N/A               | N/A        | N/A        | N/A  | overlapping peaks |              |            |      |
| K104 | 0.82 ± 0.04       | 17.7 ± 0.9 | 21.6 ± 1.5 | 0.74 | 0.91 ± 0.02       | 16.31 ± 0.04 | 17.9 ± 0.4 | 0.79 |
| D105 | 0.81 ± 0.02       | 17.6 ± 0.3 | 21.6 ± 0.8 | 0.74 | 0.92 ± 0.02       | 15.1 ± 0.3   | 16.4 ± 0.5 | 0.73 |
| S106 | 0.79 ± 0.01       | 17.3 ± 0.4 | 22.0 ± 0.6 | 0.64 | 0.92 ± 0.01       | 15.6 ± 0.1   | 17.0 ± 0.2 | 0.71 |
| E107 | 0.83 ± 0.02       | 13.7 ± 0.9 | 16.5 ± 1.1 | 0.62 | overlapping peaks |              |            |      |
| D108 | 0.86 ± 0.03       | 14.9 ± 0.4 | 17.4 ± 0.8 | 0.55 | overlapping peaks |              |            |      |
| V109 | 0.87 ± 0.03       | 11.6 ± 0.5 | 13.4 ± 0.8 | 0.28 | 0.93 ± 0.01       | 9.7 ± 0.1    | 10.4 ± 0.2 | 0.39 |
| P110 | N/A               | N/A        | N/A        | N/A  | N/A               | N/A          | N/A        | N/A  |
| M111 | 0.82 ± 0.01       | 14.9 ± 0.2 | 18.2 ± 0.3 | 0.86 | 0.89 ± 0.02       | 13.5 ± 0.3   | 15.2 ± 0.5 | 0.66 |
| V112 | 0.79 ± 0.03       | 17.1 ± 0.5 | 21.5 ± 1.0 | 0.81 | overlapping peaks |              |            |      |
| L113 | 0.81 ± 0.03       | 22.2 ± 0.3 | 27.3 ± 1.0 | 0.77 | 0.91 ± 0.01       | 17.6 ± 0.2   | 19.3 ± 0.3 | 0.84 |
| V114 | 0.78 ± 0.05       | 20.1 ± 1.8 | 25.7 ± 2.8 | 0.84 | 0.94 ± 0.01       | 17.7 ± 0.2   | 18.9 ± 0.3 | 0.87 |
| G115 | 0.77 ± 0.02       | 19.3 ± 0.5 | 24.9 ± 0.9 | 0.80 | 0.86 ± 0.01       | 14.0 ± 0.3   | 16.2 ± 0.4 | 0.87 |
| N116 | 0.79 ± 0.02       | 16.5 ± 0.7 | 20.9 ± 1.0 | 0.89 | 0.88 ± 0.01       | 15.2 ± 0.4   | 17.3 ± 0.5 | 0.81 |
| K117 | 0.69 ± 0.03       | 19.7 ± 2.8 | 28.4 ± 4.2 | 0.82 | 0.86 ± 0.01       | 18.4 ± 1.3   | 21.3 ± 1.6 | 0.90 |
| C118 | 0.79 ± 0.03       | 19.2 ± 1.4 | 24.2 ± 2.1 | 0.86 | 0.84 ± 0.02       | 16.9 ± 0.1   | 20.1 ± 0.5 | 0.87 |
| D119 | 0.78 ± 0.02       | 19.5 ± 0.9 | 25.2 ± 1.4 | 0.84 | 0.93 ± 0.02       | 17.7 ± 0.4   | 18.9 ± 0.5 | 0.86 |
| L120 | 0.77 ± 0.02       | 19.9 ± 0.2 | 26.0 ± 0.8 | 0.80 | 0.91 ± 0.03       | 16.9 ± 0.2   | 18.5 ± 0.7 | 0.80 |
| P121 | N/A               | N/A        | N/A        | N/A  | N/A               | N/A          | N/A        | N/A  |
| S122 | 0.78 ± 0.07       | 15.0 ± 0.3 | 19.4 ± 1.7 | 0.63 | 0.85 ± 0.03       | 12.8 ± 0.3   | 15 ± 0.6   | 0.65 |
| R123 | overlapping peaks |            |            |      | overlapping peaks |              |            |      |
| T124 | 0.72 ± 0.07       | 14.6 ± 1.2 | 20.3 ± 2.6 | 0.69 | 0.90 ± 0.02       | 15.4 ± 0.2   | 17.2 ± 0.5 | 0.80 |
| V125 | 0.76 ± 0.02       | 20.4 ± 1.4 | 26.7 ± 2.0 | 0.82 | 0.85 ± 0.02       | 15.1 ± 1.6   | 17.7 ± 1.9 | 0.84 |
| D126 | 0.86 ± 0.01       | 18.7 ± 0.4 | 21.8 ± 0.6 | 0.73 | 0.96 ± 0.02       | 16.3 ± 0.2   | 17.1 ± 0.4 | 0.76 |
| T127 | overlapping peaks |            |            |      | 0.92 ± 0.01       | 16.5 ± 0.7   | 17.9 ± 0.8 | 0.82 |
| K128 | 0.85 ± 0.02       | 18.2 ± 0.5 | 21.5 ± 0.8 | 0.69 | overlapping peaks |              |            |      |
| Q129 | 0.80 ± 0.01       | 17.6 ± 0.2 | 21.9 ± 0.4 | 0.66 | 0.90 ± 0.01       | 15.1 ± 0.1   | 16.7 ± 0.2 | 0.69 |
| A130 | 0.82 ± 0.01       | 16.8 ± 0.5 | 20.4 ± 0.6 | 0.80 | 0.91 ± 0.01       | 15.2 ± 0.2   | 16.8 ± 0.3 | 0.84 |
| Q131 | overlapping peaks |            |            |      | 0.89 ± 0.01       | 17.0 ± 0.2   | 19.1 ± 0.3 | 0.85 |
| D132 | 0.77 ± 0.02       | 19.2 ± 0.4 | 24.8 ± 0.8 | 0.77 | 0.87 ± 0.02       | 16.0 ± 0.2   | 18.3 ± 0.4 | 0.80 |
| L133 | 0.77 ± 0.03       | 17.7 ± 0.7 | 22.9 ± 1.2 | 0.75 | 0.90 ± 0.01       | 15.3 ± 0.1   | 16.9 ± 0.2 | 0.83 |
| A134 | 0.80 ± 0.01       | 17.1 ± 0.4 | 21.5 ± 0.6 | 0.89 | 0.91 ± 0.01       | 16.6 ± 0.3   | 18.2 ± 0.4 | 0.84 |

|      |                   |            |            |      |                   |            |            |      |
|------|-------------------|------------|------------|------|-------------------|------------|------------|------|
| R135 | 0.77 ± 0.02       | 20.4 ± 0.3 | 26.5 ± 0.8 | 0.84 | 0.88 ± 0.01       | 17.1 ± 0.3 | 19.4 ± 0.4 | 0.90 |
| S136 | 0.75 ± 0.01       | 19.8 ± 0.4 | 26.3 ± 0.6 | 0.85 | overlapping peaks |            |            |      |
| Y137 | overlapping peaks |            |            |      | 0.87 ± 0.02       | 14.8 ± 0.5 | 17.0 ± 0.7 | 0.81 |
| G138 | 0.72 ± 0.01       | 18.1 ± 0.9 | 25.0 ± 1.3 | 0.87 | 0.86 ± 0.01       | 15.1 ± 0.1 | 17.5 ± 0.2 | 0.84 |
| I139 | 0.77 ± 0.02       | 17.9 ± 0.7 | 23.4 ± 1.1 | 0.85 | 0.88 ± 0.01       | 16.7 ± 0.4 | 18.9 ± 0.6 | 0.87 |
| P140 | N/A               | N/A        | N/A        | N/A  | N/A               | N/A        | N/A        | N/A  |
| F141 | 0.70 ± 0.02       | 15.2 ± 0.3 | 21.6 ± 0.6 | 0.81 | overlapping peaks |            |            |      |
| I142 | 0.86 ± 0.01       | 17.9 ± 0.5 | 20.9 ± 0.7 | 0.84 | 0.918 ± 0.004     | 16.2 ± 0.2 | 17.7 ± 0.3 | 0.82 |
| E143 | 0.76 ± 0.01       | 16.6 ± 0.7 | 22.0 ± 0.9 | 0.71 | 0.87 ± 0.02       | 15.0 ± 0.4 | 17.2 ± 0.5 | 0.76 |
| T144 | 0.79 ± 0.02       | 17.3 ± 0.7 | 21.8 ± 1.1 | 0.87 | 0.86 ± 0.02       | 15.2 ± 0.2 | 17.6 ± 0.4 | 0.81 |
| S145 | 0.72 ± 0.01       | 16.1 ± 1.3 | 22.3 ± 1.8 | 0.89 | 0.851 ± 0.003     | 15.3 ± 0.1 | 18.0 ± 0.1 | 0.85 |
| A146 | 0.76 ± 0.02       | 23.5 ± 1.4 | 30.7 ± 2.0 | 0.87 | 0.89 ± 0.01       | 18.1 ± 0.3 | 20.4 ± 0.4 | 0.88 |
| K147 | 0.76 ± 0.02       | 19.0 ± 1.2 | 25.2 ± 1.8 | 0.8  | 0.86 ± 0.01       | 15.9 ± 0.1 | 18.5 ± 0.4 | 0.83 |
| T148 | 0.80 ± 0.03       | 19.7 ± 1.5 | 24.6 ± 2.1 | 0.74 | 0.88 ± 0.01       | 15.2 ± 0.3 | 17.3 ± 0.4 | 0.86 |
| R149 | 0.84 ± 0.02       | 19.7 ± 1.3 | 23.4 ± 1.6 | 0.75 | overlapping peaks |            |            |      |
| Q150 | 0.73 ± 0.03       | 18.3 ± 1.2 | 25.1 ± 2.0 | 0.73 | 0.78 ± 0.01       | 14.2 ± 0.7 | 18.3 ± 0.9 | 0.71 |
| G151 | 0.86 ± 0.02       | 17.9 ± 0.6 | 20.8 ± 0.8 | 0.8  | 0.93 ± 0.02       | 15.4 ± 0.5 | 16.5 ± 0.6 | 0.81 |
| V152 | 0.78 ± 0.02       | 18.3 ± 0.5 | 23.5 ± 0.9 | 0.79 | 0.93 ± 0.01       | 16.0 ± 0.2 | 17.2 ± 0.3 | 0.84 |
| D153 | overlapping peaks |            |            |      | 0.87 ± 0.01       | 16.0 ± 0.2 | 18.3 ± 0.3 | 0.88 |
| D154 | 0.76 ± 0.02       | 18.5 ± 0.4 | 24.4 ± 0.8 | 0.82 | 0.86 ± 0.01       | 16.0 ± 0.2 | 18.6 ± 0.3 | 0.86 |
| A155 | 0.82 ± 0.02       | 18.4 ± 0.8 | 22.5 ± 1.2 | 0.84 | 0.92 ± 0.01       | 15.8 ± 0.2 | 17.2 ± 0.3 | 0.86 |
| F156 | 0.79 ± 0.01       | 16.3 ± 0.6 | 20.7 ± 0.8 | 0.79 | 0.88 ± 0.01       | 14.7 ± 0.5 | 16.6 ± 0.6 | 0.88 |
| Y157 | 0.76 ± 0.01       | 20.4 ± 0.4 | 26.9 ± 0.6 | 0.78 | 0.88 ± 0.02       | 16.7 ± 0.3 | 19.0 ± 0.5 | 0.83 |
| T158 | 0.79 ± 0.02       | 19.3 ± 0.7 | 24.4 ± 1.1 | 0.88 | 0.86 ± 0.01       | 17.1 ± 0.2 | 19.8 ± 0.4 | 0.81 |
| L159 | 0.8 ± 0.02        | 17.6 ± 0.3 | 21.9 ± 0.7 | 0.80 | 0.92 ± 0.01       | 16.1 ± 0.4 | 17.5 ± 0.4 | 0.83 |
| V160 | overlapping peaks |            |            |      | overlapping peaks |            |            |      |
| R161 | 0.78 ± 0.02       | 18.2 ± 0.4 | 23.4 ± 0.8 | 0.81 | 0.88 ± 0.02       | 16.6 ± 0.2 | 18.8 ± 0.4 | 0.82 |
| E162 | 0.82 ± 0.03       | 20.4 ± 0.9 | 25.1 ± 1.4 | 0.79 | 0.89 ± 0.01       | 16.1 ± 0.2 | 18.2 ± 0.3 | 0.81 |
| I163 | overlapping peaks |            |            |      | 0.89 ± 0.01       | 14.9 ± 0.1 | 16.7 ± 0.2 | 0.86 |
| R164 | 0.81 ± 0.03       | 17.2 ± 0.6 | 21.3 ± 1.1 | 0.77 | 0.96 ± 0.03       | 14.0 ± 0.2 | 14.7 ± 0.6 | 0.73 |
| K165 | overlapping peaks |            |            |      | 0.90 ± 0.01       | 15.9 ± 0.1 | 17.6 ± 0.2 | 0.86 |
| H166 | 0.82 ± 0.02       | 17.7 ± 0.4 | 21.6 ± 0.7 | 0.74 | 0.99 ± 0.03       | 14.9 ± 0.1 | 15.1 ± 0.4 | 0.74 |
| K167 | 0.90 ± 0.02       | 14.1 ± 0.2 | 15.6 ± 0.4 | 0.60 | 1.01 ± 0.01       | 13.7 ± 0.2 | 13.5 ± 0.2 | 0.62 |
| E168 | 1.05 ± 0.03       | 12.3 ± 0.3 | 11.7 ± 0.5 | 0.49 | overlapping peaks |            |            |      |
| K169 | 1.25 ± 0.01       | 5.6 ± 0.3  | 4.5 ± 0.2  | 0.14 | 1.25 ± 0.01       | 5.0 ± 0.1  | 4.0 ± 0.1  | 0.13 |

**Table S3** Extended model-free parameters ( $S^2$ ,  $S_s^2$ ,  $S_f^2$ ,  $\tau_e$ ,  $R_{ex}$ ) of K-Ras-G12V·Mg<sup>2+</sup> bound to GTP and GDP recorded at 700 MHz at 298 K. P-loop (red), switch-I (orange) and switch-II (blue) are colored.

| Res. | K-Ras-G12V-GTP    |             |             |               |                            |
|------|-------------------|-------------|-------------|---------------|----------------------------|
|      | $S^2$             | $S_s^2$     | $S_f^2$     | $\tau_e$ / ps | $R_{ex}$ / s <sup>-1</sup> |
| M1   | N/A               | N/A         | N/A         | N/A           | N/A                        |
| T2   | 0.52 ± 0.02       | 0.78 ± 0.02 | 0.66 ± 0.02 | 1010 ± 91     | -                          |
| E3   | 0.89 ± 0.01       | 1           | 0.89 ± 0.01 | -             | -                          |
| Y4   | 0.67 ± 0.03       | 0.77 ± 0.02 | 0.88 ± 0.02 | 579 ± 132     | -                          |
| K5   | overlapping peaks |             |             |               |                            |
| L6   | 0.88 ± 0.02       | 1           | 0.88 ± 0.02 | -             | -                          |
| V7   | 0.81 ± 0.04       | 1           | 0.81 ± 0.04 | 20 ± 10       | -                          |
| V8   | N/A               | N/A         | N/A         | N/A           | N/A                        |
| V9   | 0.86 ± 0.01       | 1           | 0.86 ± 0.01 | -             | -                          |
| G10  | 0.90 ± 0.08       | 1           | 0.90 ± 0.08 | -             | -                          |
| A11  | N/A               | N/A         | N/A         | N/A           | N/A                        |
| V12  | 0.9 ± 0.02        | 1           | 0.9 ± 0.02  | -             | -                          |
| G13  | 0.83 ± 0.04       | 1           | 0.83 ± 0.04 | 37 ± 15       | -                          |
| V14  | 0.91 ± 0.02       | 1           | 0.91 ± 0.02 | -             | -                          |
| G15  | 0.96 ± 0.03       | 1           | 0.96 ± 0.03 | -             | -                          |
| K16  | 0.87 ± 0.07       | 1           | 0.87 ± 0.07 | -             | -                          |
| S17  | 0.96 ± 0.07       | 1           | 0.96 ± 0.07 | -             | -                          |
| A18  | 0.81 ± 0.03       | 1           | 0.81 ± 0.03 | -             | -                          |
| L19  | 0.92 ± 0.02       | 1           | 0.92 ± 0.02 | -             | -                          |
| T20  | 0.92 ± 0.04       | 1           | 0.92 ± 0.04 | -             | -                          |
| I21  | 0.91 ± 0.1        | 1           | 0.91 ± 0.1  | -             | -                          |
| Q22  | N/A               | N/A         | N/A         | N/A           | N/A                        |
| L23  | 0.87 ± 0.05       | 1           | 0.87 ± 0.05 | -             | -                          |
| I24  | 0.82 ± 0.03       | 1           | 0.82 ± 0.03 | -             | -                          |
| Q25  | 0.73 ± 0.05       | 1           | 0.73 ± 0.05 | -             | 6 ± 2                      |
| N26  | 0.89 ± 0.02       | 1           | 0.89 ± 0.02 | -             | -                          |
| H27  | 0.83 ± 0.03       | 1           | 0.83 ± 0.03 | 30 ± 10       | -                          |
| F28  | overlapping peaks |             |             |               |                            |
| V29  | 0.74 ± 0.14       | 1           | 0.74 ± 0.14 | 19 ± 14       | -                          |
| D30  | N/A               | N/A         | N/A         | N/A           | N/A                        |
| E31  | N/A               | N/A         | N/A         | N/A           | N/A                        |
| Y32  | 0.91 ± 0.06       | 1           | 0.91 ± 0.06 | -             | -                          |
| D33  | N/A               | N/A         | N/A         | N/A           | N/A                        |
| P34  | N/A               | N/A         | N/A         | N/A           | N/A                        |
| T35  | N/A               | N/A         | N/A         | N/A           | N/A                        |
| I36  | N/A               | N/A         | N/A         | N/A           | N/A                        |
| E37  | N/A               | N/A         | N/A         | N/A           | N/A                        |
| D38  | N/A               | N/A         | N/A         | N/A           | N/A                        |
| S39  | 0.80 ± 0.04       | 1           | 0.80 ± 0.04 | -             | -                          |
| Y40  | overlapping peaks |             |             |               |                            |
| R41  | overlapping peaks |             |             |               |                            |
| K42  | 0.71 ± 0.02       | 0.78 ± 0.02 | 0.91 ± 0.02 | 907 ± 237     | -                          |



|     |             |     |                   |         |           |
|-----|-------------|-----|-------------------|---------|-----------|
| Q43 | 0.94 ± 0.02 | 1   | 0.94 ± 0.02       | -       | -         |
| V44 |             |     | overlapping peaks |         |           |
| V45 | 0.71 ± 0.01 | 1   | 0.71 ± 0.01       | -       | -         |
| I46 | 0.80 ± 0.03 | 1   | 0.80 ± 0.03       | 28 ± 9  | -         |
| D47 | 0.84 ± 0.05 | 1   | 0.84 ± 0.05       | -       | -         |
| G48 | 0.85 ± 0.02 | 1   | 0.85 ± 0.02       | -       | -         |
| E49 | 0.83 ± 0.01 | 1   | 0.83 ± 0.01       | -       | -         |
| T50 | 0.85 ± 0.02 | 1   | 0.85 ± 0.02       | -       | -         |
| C51 | 0.85 ± 0.03 | 1   | 0.85 ± 0.03       | -       | -         |
| L52 | 0.85 ± 0.03 | 1   | 0.85 ± 0.03       | -       | -         |
| L53 |             |     | overlapping peaks |         |           |
| D54 | N/A         | N/A | N/A               | N/A     | N/A       |
| I55 | N/A         | N/A | N/A               | N/A     | N/A       |
| L56 | N/A         | N/A | N/A               | N/A     | N/A       |
| D57 | N/A         | N/A | N/A               | N/A     | N/A       |
| T58 | N/A         | N/A | N/A               | N/A     | N/A       |
| A59 | N/A         | N/A | N/A               | N/A     | N/A       |
| G60 | N/A         | N/A | N/A               | N/A     | N/A       |
| Q61 | N/A         | N/A | N/A               | N/A     | N/A       |
| E62 | N/A         | N/A | N/A               | N/A     | N/A       |
| E63 | N/A         | N/A | N/A               | N/A     | N/A       |
| Y64 | N/A         | N/A | N/A               | N/A     | N/A       |
| S65 | N/A         | N/A | N/A               | N/A     | N/A       |
| A66 | N/A         | N/A | N/A               | N/A     | N/A       |
| M67 | N/A         | N/A | N/A               | N/A     | N/A       |
| R68 | N/A         | N/A | N/A               | N/A     | N/A       |
| D69 | N/A         | N/A | N/A               | N/A     | N/A       |
| Q70 | N/A         | N/A | N/A               | N/A     | N/A       |
| Y71 | N/A         | N/A | N/A               | N/A     | N/A       |
| M72 | N/A         | N/A | N/A               | N/A     | N/A       |
| R73 | N/A         | N/A | N/A               | N/A     | N/A       |
| T74 | 0.88 ± 0.08 | 1   | 0.88 ± 0.08       | 52 ± 46 | -         |
| G75 | 0.92 ± 0.02 | 1   | 0.92 ± 0.02       | 67 ± 21 | 2.5 ± 0.5 |
| E76 |             |     | overlapping peaks |         |           |
| G77 | 0.82 ± 0.01 | 1   | 0.82 ± 0.01       | -       | -         |
| F78 | 0.9 ± 0.04  | 1   | 0.9 ± 0.04        | -       | -         |
| L79 | 0.98 ± 0.07 | 1   | 0.98 ± 0.07       | -       | -         |
| C80 | 0.75 ± 0.02 | 1   | 0.75 ± 0.02       | -       | 2.2 ± 0.6 |
| V81 | 0.86 ± 0.04 | 1   | 0.86 ± 0.04       | -       | -         |
| F82 | 0.89 ± 0.01 | 1   | 0.89 ± 0.01       | -       | -         |
| A83 |             |     | overlapping peaks |         |           |
| I84 | 0.83 ± 0.01 | 1   | 0.83 ± 0.01       | 0 ± 0   | 0 ± 0     |
| N85 |             |     | overlapping peaks |         |           |
| N86 | N/A         | N/A | N/A               | N/A     | N/A       |
| T87 | N/A         | N/A | N/A               | N/A     | N/A       |
| K88 | 0.89 ± 0.02 | 1   | 0.89 ± 0.02       | -       | -         |

|      |             |             |                   |           |           |
|------|-------------|-------------|-------------------|-----------|-----------|
| S89  | 0.83 ± 0.02 | 1           | 0.83 ± 0.02       | -         | -         |
| F90  | 0.85 ± 0.02 | 1           | 0.85 ± 0.02       | 31 ± 10   | 5.1 ± 1   |
| E91  | 0.86 ± 0.02 | 1           | 0.86 ± 0.02       | -         | -         |
| D92  | 0.89 ± 0.04 | 1           | 0.89 ± 0.04       | -         | -         |
| I93  | 0.84 ± 0.04 | 1           | 0.84 ± 0.04       | -         | -         |
| H94  | 0.90 ± 0.04 | 1           | 0.90 ± 0.04       | -         | -         |
| H95  | 0.99 ± 0.04 | 1           | 0.99 ± 0.04       | -         | -         |
| Y96  | 0.93 ± 0.03 | 1           | 0.93 ± 0.03       | -         | -         |
| R97  |             |             | overlapping peaks |           |           |
| E98  | 0.94 ± 0.02 | 1           | 0.94 ± 0.02       | -         | -         |
| Q99  |             |             | overlapping peaks |           |           |
| I100 | 0.90 ± 0.02 | 1           | 0.90 ± 0.02       | -         | -         |
| K101 |             |             | overlapping peaks |           |           |
| R102 | 0.87 ± 0.02 | 1           | 0.87 ± 0.02       | -         | -         |
| V103 | N/A         | N/A         | N/A               | N/A       | N/A       |
| K104 | 0.89 ± 0.03 | 1           | 0.89 ± 0.03       | -         | -         |
| D105 | 0.86 ± 0.01 | 1           | 0.86 ± 0.01       | 29 ± 12   | -         |
| S106 | 0.83 ± 0.01 | 1           | 0.83 ± 0.01       | 38 ± 8    | -         |
| E107 | 0.66 ± 0.04 | 0.78 ± 0.03 | 0.847 ± 0.027     | 900 ± 168 | -         |
| D108 | 0.72 ± 0.03 | 0.84 ± 0.02 | 0.855 ± 0.02      | 663 ± 114 | -         |
| V109 | 0.55 ± 0.03 | 0.77 ± 0.03 | 0.708 ± 0.026     | 642 ± 61  | -         |
| P110 | N/A         | N/A         | N/A               | N/A       | N/A       |
| M111 | N/A         | N/A         | N/A               | N/A       | N/A       |
| V112 | 0.85 ± 0.02 | 1           | 0.85 ± 0.02       | -         | -         |
| L113 | 0.88 ± 0.03 | 1           | 0.88 ± 0.03       | 21 ± 13   | 4.3 ± 0.7 |
| V114 | 0.89 ± 0.04 | 1           | 0.89 ± 0.04       | -         | -         |
| G115 | 0.85 ± 0.02 | 1           | 0.85 ± 0.02       | -         | 1.9 ± 0.7 |
| N116 | 0.85 ± 0.02 | 1           | 0.85 ± 0.02       | -         | -         |
| K117 | 0.77 ± 0.03 | 1           | 0.77 ± 0.03       | -         | -         |
| C118 | 0.88 ± 0.03 | 1           | 0.88 ± 0.03       | -         | -         |
| D119 | 0.88 ± 0.02 | 1           | 0.88 ± 0.02       | -         | -         |
| L120 | 0.84 ± 0.03 | 1           | 0.84 ± 0.03       | -         | 2.7 ± 0.5 |
| P121 | N/A         | N/A         | N/A               | N/A       | N/A       |
| S122 | 0.74 ± 0.01 | 1           | 0.74 ± 0.01       | 25 ± 6    | -         |
| R123 |             |             | overlapping peaks |           |           |
| T124 | 0.73 ± 0.05 | 1           | 0.73 ± 0.05       | 16 ± 6    | -         |
| V125 | 0.85 ± 0.02 | 1           | 0.85 ± 0.02       | -         | -         |
| D126 | 0.92 ± 0.01 | 1           | 0.92 ± 0.01       | 50 ± 19   | -         |
| T127 |             |             | overlapping peaks |           |           |
| K128 | 0.89 ± 0.02 | 1           | 0.89 ± 0.02       | 54 ± 16   | -         |
| Q129 | 0.86 ± 0.01 | 1           | 0.86 ± 0.01       | 39 ± 10   | -         |
| A130 | 0.89 ± 0.01 | 1           | 0.89 ± 0.01       | -         | -         |
| Q131 |             |             | overlapping peaks |           |           |
| D132 | 0.89 ± 0.02 | 1           | 0.89 ± 0.02       | -         | -         |
| L133 | 0.86 ± 0.02 | 1           | 0.86 ± 0.02       | -         | -         |
| A134 | 0.86 ± 0.01 | 1           | 0.86 ± 0.01       | -         | -         |

|      |             |             |                   |           |           |
|------|-------------|-------------|-------------------|-----------|-----------|
| R135 | 0.85 ± 0.02 | 1           | 0.85 ± 0.02       | -         | 3.1 ± 0.5 |
| S136 | 0.83 ± 0.01 | 1           | 0.83 ± 0.01       | -         | 2.9 ± 0.5 |
| Y137 |             |             | overlapping peaks |           |           |
| G138 | 0.80 ± 0.01 | 1           | 0.80 ± 0.01       | -         | -         |
| I139 | 0.85 ± 0.02 | 1           | 0.85 ± 0.02       | -         | -         |
| P140 | N/A         | N/A         | N/A               | N/A       | N/A       |
| F141 | 0.76 ± 0.01 | 1           | 0.76 ± 0.01       | -         | -         |
| I142 | 0.93 ± 0.01 | 1           | 0.93 ± 0.01       | -         | -         |
| E143 | 0.8 ± 0.01  | 1           | 0.8 ± 0.01        | 22 ± 7    | -         |
| T144 | 0.87 ± 0.02 | 1           | 0.87 ± 0.02       | -         | -         |
| S145 | 0.8 ± 0.02  | 1           | 0.8 ± 0.02        | -         | -         |
| A146 | 0.84 ± 0.02 | 1           | 0.84 ± 0.02       | -         | 6.3 ± 1.4 |
| K147 | 0.85 ± 0.02 | 1           | 0.85 ± 0.02       | -         | -         |
| T148 | 0.89 ± 0.03 | 1           | 0.89 ± 0.03       | -         | -         |
| R149 | 0.93 ± 0.02 | 1           | 0.93 ± 0.02       | -         | -         |
| Q150 | 0.83 ± 0.03 | 1           | 0.83 ± 0.03       | -         | -         |
| G151 | 0.92 ± 0.02 | 1           | 0.92 ± 0.02       | -         | -         |
| V152 | 0.87 ± 0.02 | 1           | 0.87 ± 0.02       | -         | -         |
| D153 |             |             | overlapping peaks |           |           |
| D154 | 0.83 ± 0.02 | 1           | 0.83 ± 0.02       | -         | 1.5 ± 0.6 |
| A155 | 0.90 ± 0.02 | 1           | 0.90 ± 0.02       | -         | -         |
| F156 | 0.85 ± 0.01 | 1           | 0.85 ± 0.01       | -         | -         |
| Y157 | 0.83 ± 0.01 | 1           | 0.83 ± 0.01       | -         | 3.4 ± 0.4 |
| T158 | 0.89 ± 0.02 | 1           | 0.89 ± 0.02       | -         | -         |
| L159 | 0.87 ± 0.01 | 1           | 0.87 ± 0.01       | -         | -         |
| V160 |             |             | overlapping peaks |           |           |
| R161 | 0.88 ± 0.02 | 1           | 0.88 ± 0.02       | -         | -         |
| E162 | 0.93 ± 0.03 | 1           | 0.93 ± 0.03       | -         | -         |
| I163 |             |             | overlapping peaks |           |           |
| R164 | 0.86 ± 0.02 | 1           | 0.86 ± 0.02       | -         | -         |
| K165 |             |             | overlapping peaks |           |           |
| H166 | 0.87 ± 0.02 | 1           | 0.87 ± 0.02       | 30 ± 12   | -         |
| K167 | 0.67 ± 0.02 | 0.82 ± 0.01 | 0.82 ± 0.01       | 941 ± 129 | -         |
| E168 | 0.57 ± 0.02 | 0.83 ± 0.02 | 0.69 ± 0.02       | 992 ± 94  | -         |
| K169 | N/A         | N/A         | N/A               | N/A       | N/A       |

| Res. | K-Ras-G12V-GDP |             |                   |               |                            |
|------|----------------|-------------|-------------------|---------------|----------------------------|
|      | $S^2$          | $S^2_s$     | $S^2_f$           | $\tau_e$ / ps | $R_{ex}$ / s <sup>-1</sup> |
| M1   | N/A            | N/A         | N/A               | N/A           | N/A                        |
| T2   | 0.54 ± 0.02    | 0.78 ± 0.02 | 0.69 ± 0.02       | 999 ± 102     | -                          |
| E3   | 0.90 ± 0.01    | 1           | 0.9 ± 0.01        | -             | -                          |
| Y4   | N/A            | N/A         | N/A               | N/A           | N/A                        |
| K5   | 0.829 ± 003    | 1           | 0.829 ± 003       | -             | -                          |
| L6   | 0.86 ± 0.01    | 1           | 0.86 ± 0.01       | -             | 1.7 ± 0.3                  |
| V7   |                |             | overlapping peaks |               |                            |
| V8   | 0.875 ± 003    | 1           | 0.875 ± 003       | -             | 3.2 ± 0.2                  |
| V9   | 0.85 ± 0.01    | 1           | 0.85 ± 0.01       | -             | -                          |
| G10  | 0.88 ± 0.01    | 1           | 0.88 ± 0.01       | -             | -                          |
| A11  | 0.820 ± 004    | 1           | 0.820 ± 004       | -             | -                          |
| V12  |                |             | overlapping peaks |               |                            |
| G13  | 0.83 ± 0.01    | 1           | 0.83 ± 0.01       | -             | 1.9 ± 0.3                  |
| V14  | 0.88 ± 0.01    | 1           | 0.88 ± 0.01       | -             | -                          |
| G15  | 0.91 ± 0.02    | 1           | 0.91 ± 0.02       | -             | 1.8 ± 0.4                  |
| K16  | 0.84 ± 0.02    | 1           | 0.84 ± 0.02       | -             | 2.0 ± 0.5                  |
| S17  | 0.84 ± 0.01    | 1           | 0.84 ± 0.01       | -             | 1.5 ± 0.3                  |
| A18  | 0.84 ± 0.03    | 1           | 0.84 ± 0.03       | -             | 2.3 ± 0.7                  |
| L19  | 0.871 ± 004    | 1           | 0.871 ± 004       | -             | -                          |
| T20  | 0.88 ± 0.02    | 1           | 0.88 ± 0.02       | -             | -                          |
| I21  | 0.86 ± 0.02    | 1           | 0.86 ± 0.02       | -             | 1.5 ± 0.4                  |
| Q22  | 0.91 ± 0.01    | 1           | 0.91 ± 0.01       | -             | -                          |
| L23  | 0.9 ± 0.01     | 1           | 0.9 ± 0.01        | -             | -                          |
| I24  | 0.89 ± 0.01    | 1           | 0.89 ± 0.01       | -             | -                          |
| Q25  | 0.83 ± 0.01    | 1           | 0.83 ± 0.01       | -             | 1.2 ± 0.3                  |
| N26  | 0.86 ± 0.01    | 1           | 0.86 ± 0.01       | -             | -                          |
| H27  | N/A            | N/A         | N/A               | N/A           | N/A                        |
| F28  | 0.81 ± 0.01    | 1           | 0.81 ± 0.01       | -             | -                          |
| V29  | 0.86 ± 0.04    | 1           | 0.86 ± 0.04       | -             | 3.6 ± 0.8                  |
| D30  | N/A            | N/A         | N/A               | N/A           | N/A                        |
| E31  |                |             | overlapping peaks |               |                            |
| Y32  | 0.84 ± 0.02    | 1           | 0.84 ± 0.02       | 158 ± 45      | 1.4 ± 0.5                  |
| D33  | 0.82 ± 0.03    | 1           | 0.82 ± 0.03       | -             | 3.8 ± 0.6                  |
| P34  | N/A            | N/A         | N/A               | N/A           | N/A                        |
| T35  | 0.89 ± 0.03    | 1           | 0.89 ± 0.03       | -             | 2.7 ± 0.6                  |
| I36  | 0.87 ± 0.03    | 1           | 0.87 ± 0.03       | -             | 1.3 ± 0.5                  |
| E37  | 0.91 ± 0.01    | 1           | 0.91 ± 0.01       | -             | 7.0 ± 1.7                  |
| D38  | 0.84 ± 0.02    | 1           | 0.84 ± 0.02       | 23 ± 11       | 2.0 ± 0.4                  |
| S39  | 0.84 ± 0.01    | 1           | 0.84 ± 0.01       | -             | -                          |
| Y40  | 0.83 ± 0.01    | 1           | 0.83 ± 0.01       | -             | -                          |
| R41  | N/A            | N/A         | N/A               | N/A           | N/A                        |
| K42  | 0.81 ± 0.01    | 1           | 0.81 ± 0.01       | 24 ± 8        | -                          |
| Q43  | 0.89 ± 0.01    | 1           | 0.89 ± 0.01       | -             | 1.5 ± 0.3                  |
| V44  | N/A            | N/A         | N/A               | N/A           | N/A                        |

|     |             |             |                   |            |           |
|-----|-------------|-------------|-------------------|------------|-----------|
| V45 | N/A         | N/A         | N/A               | N/A        | N/A       |
| I46 | 0.80 ± 0.01 | 1           | 0.80 ± 0.01       | -          | 2.4 ± 0.5 |
| D47 | 0.90 ± 0.03 | 1           | 0.90 ± 0.03       | -          | -         |
| G48 | 0.84 ± 0.02 | 1           | 0.84 ± 0.02       | -          | -         |
| E49 | 0.85 ± 0.01 | 1           | 0.85 ± 0.01       | -          | -         |
| T50 | 0.89 ± 0.01 | 1           | 0.89 ± 0.01       | -          | -         |
| C51 | 0.90 ± 0.01 | 1           | 0.90 ± 0.01       | -          | -         |
| L52 | N/A         | N/A         | N/A               | N/A        | N/A       |
| L53 | N/A         | N/A         | N/A               | N/A        | N/A       |
| D54 | 0.86 ± 0.01 | 1           | 0.86 ± 0.01       | -          | 0.9 ± 0.3 |
| I55 | 0.82 ± 0.01 | 1           | 0.82 ± 0.01       | -          | -         |
| L56 | 0.86 ± 0.02 | 1           | 0.86 ± 0.02       | -          | 3.5 ± 0.3 |
| D57 | 0.86 ± 0.01 | 1           | 0.86 ± 0.01       | -          | 4.1 ± 0.5 |
| T58 | 0.80 ± 0.01 | 1           | 0.80 ± 0.01       | -          | 4.7 ± 0.7 |
| A59 | 0.84 ± 0.02 | 1           | 0.84 ± 0.02       | -          | -         |
| G60 | 0.65 ± 0.02 | 0.86 ± 0.02 | 0.76 ± 0.02       | 1130 ± 161 | 0 ± 0     |
| Q61 |             |             | overlapping peaks |            |           |
| E62 | 0.7 ± 0.03  | 0.88 ± 0.03 | 0.79 ± 0.03       | 890 ± 134  | 0 ± 0     |
| E63 |             |             | overlapping peaks |            |           |
| Y64 | 0.91 ± 0.01 | 1           | 0.91 ± 0.01       | 154 ± 39   | 0 ± 0     |
| S65 |             |             | overlapping peaks |            |           |
| A66 | 0.93 ± 0.04 | 1           | 0.93 ± 0.04       | 41 ± 32    | 3.4 ± 0.7 |
| M67 | 0.88 ± 0.02 | 1           | 0.88 ± 0.02       | 45 ± 18    | -         |
| R68 | 0.92 ± 0.02 | 1           | 0.92 ± 0.02       | -          | -         |
| D69 | 0.92 ± 0.01 | 1           | 0.92 ± 0.01       | -          | -         |
| Q70 | 0.91 ± 0.01 | 1           | 0.91 ± 0.01       | -          | -         |
| Y71 |             |             | overlapping peaks |            |           |
| M72 |             |             | overlapping peaks |            |           |
| R73 | 0.85 ± 0.02 | 1           | 0.85 ± 0.02       | -          | 2.0 ± 0.5 |
| T74 | 0.90 ± 0.01 | 1           | 0.90 ± 0.01       | -          | 2.6 ± 0.4 |
| G75 | 0.89 ± 0.01 | 1           | 0.89 ± 0.01       | -          | 3.1 ± 0.8 |
| E76 | 0.82 ± 0.01 | 1           | 0.82 ± 0.01       | -          | -         |
| G77 | 0.82 ± 0.01 | 1           | 0.82 ± 0.01       | -          | -         |
| F78 | 0.84 ± 0.01 | 1           | 0.84 ± 0.01       | -          | -         |
| L79 | 0.87 ± 0.01 | 1           | 0.87 ± 0.01       | -          | 1.2 ± 0.3 |
| C80 | 0.81 ± 0.01 | 1           | 0.81 ± 0.01       | -          | 1.2 ± 0.3 |
| V81 | 0.84 ± 0.01 | 1           | 0.84 ± 0.01       | -          | 1.5 ± 0.2 |
| F82 | 0.88 ± 0.01 | 1           | 0.88 ± 0.01       | -          | -         |
| A83 | 0.85 ± 0.01 | 1           | 0.85 ± 0.01       | -          | -         |
| I84 | 0.85 ± 0.01 | 1           | 0.85 ± 0.01       | -          | -         |
| N85 | 0.89 ± 0.01 | 1           | 0.89 ± 0.01       | -          | 1.7 ± 0.3 |
| N86 | 0.86 ± 0.03 | 1           | 0.86 ± 0.03       | -          | 1.3 ± 0.6 |
| T87 | N/A         | N/A         | N/A               | N/A        | N/A       |
| K88 | 0.88 ± 0.01 | 1           | 0.88 ± 0.01       | -          | -         |
| S89 | 0.83 ± 0.01 | 1           | 0.83 ± 0.01       | -          | 1.2 ± 0.4 |
| F90 | 0.86 ± 0.01 | 1           | 0.86 ± 0.01       | -          | 2.4 ± 0.2 |

|      |               |             |                   |           |           |
|------|---------------|-------------|-------------------|-----------|-----------|
| E91  | 0.83 ± 0.01   | 1           | 0.83 ± 0.01       | -         | -         |
| D92  | 0.87 ± 0.01   | 1           | 0.87 ± 0.01       | -         | -         |
| I93  | 0.87 ± 0.01   | 1           | 0.87 ± 0.01       | -         | 1.8 ± 0.6 |
| H94  | 0.86 ± 0.01   | 1           | 0.86 ± 0.01       | -         | 1.8 ± 0.5 |
| H95  | 0.88 ± 0.01   | 1           | 0.88 ± 0.01       | -         | -         |
| Y96  | 0.89 ± 0.01   | 1           | 0.89 ± 0.01       | -         | -         |
| R97  | 0.84 ± 0.01   | 1           | 0.84 ± 0.01       | -         | 1.3 ± 0.3 |
| E98  |               |             | overlapping peaks |           |           |
| Q99  |               |             | overlapping peaks |           |           |
| I100 | 0.91 ± 0.01   | 1           | 0.91 ± 0.01       | -         | -         |
| K101 | 0.914 ± 0.004 | 1           | 0.914 ± 0.004     | -         | -         |
| R102 | 0.88 ± 0.01   | 1           | 0.88 ± 0.01       | -         | 1.4 ± 0.2 |
| V103 |               |             | overlapping peaks |           |           |
| K104 | 0.910 ± 0.002 | 1           | 0.910 ± 0.002     | -         | -         |
| D105 | 0.85 ± 0.01   | 1           | 0.85 ± 0.01       | 34 ± 12   | -         |
| S106 | 0.87 ± 0.01   | 1           | 0.87 ± 0.01       | 30 ± 9    | -         |
| E107 |               |             | overlapping peaks |           |           |
| D108 |               |             | overlapping peaks |           |           |
| V109 | 0.52 ± 0.01   | 0.74 ± 0.01 | 0.7 ± 0.01        | 750 ± 60  | -         |
| P110 | N/A           | N/A         | N/A               | N/A       | N/A       |
| M111 | 0.75 ± 0.02   | 0.82 ± 0.02 | 0.91 ± 0.02       | 603 ± 164 | -         |
| V112 |               |             | overlapping peaks |           |           |
| L113 | 0.88 ± 0.01   | 1           | 0.88 ± 0.01       | -         | 1.9 ± 0.2 |
| V114 | 0.90 ± 0.01   | 1           | 0.90 ± 0.01       | -         | 1.6 ± 0.2 |
| G115 | 0.83 ± 0.01   | 1           | 0.83 ± 0.01       | -         | -         |
| N116 | 0.85 ± 0.01   | 1           | 0.85 ± 0.01       | -         | -         |
| K117 | 0.83 ± 0.01   | 1           | 0.83 ± 0.01       | -         | 3.5 ± 1.3 |
| C118 | 0.81 ± 0.02   | 1           | 0.81 ± 0.02       | -         | 2.4 ± 0.4 |
| D119 | 0.90 ± 0.02   | 1           | 0.90 ± 0.02       | -         | 1.5 ± 0.5 |
| L120 | 0.93 ± 0.01   | 1           | 0.93 ± 0.01       | -         | -         |
| P121 | N/A           | N/A         | N/A               | N/A       | N/A       |
| S122 | 0.71 ± 0.02   | 0.78 ± 0.02 | 0.9 ± 0.02        | 611 ± 170 | -         |
| R123 |               |             | overlapping peaks |           |           |
| T124 | 0.86 ± 0.01   | 1           | 0.86 ± 0.01       | -         | -         |
| V125 | 0.83 ± 0.02   | 1           | 0.83 ± 0.02       | -         | -         |
| D126 | 0.92 ± 0.01   | 1           | 0.92 ± 0.01       | -         | -         |
| T127 | 0.89 ± 0.01   | 1           | 0.89 ± 0.01       | -         | -         |
| K128 |               |             | overlapping peaks |           |           |
| Q129 | 0.84 ± 0.01   | 1           | 0.84 ± 0.01       | 33 ± 7    | -         |
| A130 | 0.87 ± 0.01   | 1           | 0.87 ± 0.01       | -         | -         |
| Q131 | 0.86 ± 0.01   | 1           | 0.86 ± 0.01       | -         | 1.6 ± 0.2 |
| D132 | 0.84 ± 0.02   | 1           | 0.84 ± 0.02       | -         | 0.9 ± 0.3 |
| L133 | 0.87 ± 0.01   | 1           | 0.87 ± 0.01       | -         | -         |
| A134 | 0.89 ± 0.01   | 1           | 0.89 ± 0.01       | -         | -         |
| R135 | 0.85 ± 0.01   | 1           | 0.85 ± 0.01       | -         | 1.9 ± 0.3 |
| S136 |               |             | overlapping peaks |           |           |

|      |               |             |                   |           |           |
|------|---------------|-------------|-------------------|-----------|-----------|
| Y137 | 0.84 ± 0.02   | 1           | 0.84 ± 0.02       | -         | -         |
| G138 | 0.836 ± 0.004 | 1           | 0.836 ± 0.004     | -         | -         |
| I139 | 0.85 ± 0.01   | 1           | 0.85 ± 0.01       | -         | 1.4 ± 0.5 |
| P140 | N/A           | N/A         | N/A               | N/A       | N/A       |
| F141 |               |             | overlapping peaks |           |           |
| I142 | 0.888 ± 0.004 | 1           | 0.888 ± 0.004     | -         | -         |
| E143 | 0.84 ± 0.01   | 1           | 0.84 ± 0.01       | -         | -         |
| T144 | 0.84 ± 0.01   | 1           | 0.84 ± 0.01       | -         | -         |
| S145 | 0.821 ± 0.003 | 1           | 0.821 ± 0.003     | -         | 0.6 ± 0.1 |
| A146 | 0.86 ± 0.01   | 1           | 0.86 ± 0.01       | -         | 2.7 ± 0.3 |
| K147 | 0.83 ± 0.01   | 1           | 0.83 ± 0.01       | -         | 1.0 ± 0.3 |
| T148 | 0.85 ± 0.01   | 1           | 0.85 ± 0.01       | -         | -         |
| R149 |               |             | overlapping peaks |           |           |
| Q150 | 0.75 ± 0.01   | 1           | 0.75 ± 0.01       | -         | -         |
| G151 | 0.89 ± 0.01   | 1           | 0.89 ± 0.01       | -         | -         |
| V152 | 0.90 ± 0.01   | 1           | 0.90 ± 0.01       | -         | -         |
| D153 | 0.84 ± 0.01   | 1           | 0.84 ± 0.01       | -         | 0.9 ± 0.3 |
| D154 | 0.83 ± 0.01   | 1           | 0.83 ± 0.01       | -         | 1.1 ± 0.2 |
| A155 | 0.89 ± 0.01   | 1           | 0.89 ± 0.01       | -         | -         |
| F156 | 0.85 ± 0.01   | 1           | 0.85 ± 0.01       | -         | -         |
| Y157 | 0.85 ± 0.02   | 1           | 0.85 ± 0.02       | -         | 1.5 ± 0.4 |
| T158 | 0.83 ± 0.01   | 1           | 0.83 ± 0.01       | -         | 2.2 ± 0.3 |
| L159 | 0.89 ± 0.01   | 1           | 0.89 ± 0.01       | -         | -         |
| V160 |               |             | overlapping peaks |           |           |
| R161 | 0.85 ± 0.02   | 1           | 0.85 ± 0.02       | -         | 1.3 ± 0.4 |
| E162 | 0.86 ± 0.01   | 1           | 0.86 ± 0.01       | -         | 0.8 ± 0.3 |
| I163 | 0.84 ± 0.01   | 1           | 0.84 ± 0.01       | -         | -         |
| R164 | N/A           | N/A         | N/A               | N/A       | N/A       |
| K165 | 0.88 ± 0.01   | 1           | 0.88 ± 0.01       | -         | -         |
| H166 | N/A           | N/A         | N/A               | N/A       | N/A       |
| K167 | 0.75 ± 0.02   | 0.88 ± 0.01 | 0.85 ± 0.01       | 799 ± 125 | -         |
| E168 |               |             | overlapping peaks |           |           |
| K169 | N/A           | N/A         | N/A               | N/A       | N/A       |

**Table S4** Backbone  $^{15}\text{N}$  chemical shift differences between the ground and higher energy state ( $|\Delta\delta_{\text{EG}}|$ ) as derived from a global fit analysis of CPMG relaxation dispersion measurements of the investigated GDP-bound K-Ras variants with parameters listed in Table 1 of the main text. P-loop (red), switch-I (orange) and switch-II (blue) are colored.

| Res. | wt / ppm        | G12C / ppm      | G12D / ppm      | G12V / ppm      |
|------|-----------------|-----------------|-----------------|-----------------|
| M1   | -               | -               | -               | -               |
| T2   | -               | -               | -               | -               |
| E3   | -               | -               | -               | -               |
| Y4   | $0.84 \pm 0.08$ | $1.53 \pm 0.13$ | $0.58 \pm 0.05$ | $0.87 \pm 0.08$ |
| K5   | $1.75 \pm 0.11$ | $1.27 \pm 0.11$ | $1.11 \pm 0.09$ | $1.26 \pm 0.11$ |
| L6   | $1.62 \pm 0.13$ | -               | $1.50 \pm 0.13$ | $1.95 \pm 0.16$ |
| V7   | -               | -               | -               | -               |
| V8   | -               | -               | $0.94 \pm 0.09$ | -               |
| V9   | $1.25 \pm 0.11$ | $1.62 \pm 0.13$ | $1.17 \pm 0.11$ | $1.80 \pm 0.14$ |
| G10  | $1.17 \pm 0.10$ | $1.16 \pm 0.10$ | $0.99 \pm 0.09$ | $1.27 \pm 0.10$ |
| A11  | $0.75 \pm 0.08$ | $1.15 \pm 0.10$ | $0.76 \pm 0.06$ | $1.25 \pm 0.10$ |
| V12  | $0.76 \pm 0.08$ | $1.46 \pm 0.11$ | $0.73 \pm 0.06$ | -               |
| G13  | -               | $3.68 \pm 0.29$ | $1.33 \pm 0.13$ | -               |
| V14  | -               | $0.70 \pm 0.06$ | $0.93 \pm 0.09$ | -               |
| G15  | $0.66 \pm 0.05$ | -               | $0.91 \pm 0.08$ | -               |
| K16  | $1.33 \pm 0.11$ | -               | $1.86 \pm 0.18$ | -               |
| S17  | -               | -               | -               | $0.99 \pm 0.09$ |
| A18  | -               | -               | -               | -               |
| L19  | -               | -               | -               | -               |
| T20  | $0.67 \pm 0.06$ | $0.91 \pm 0.08$ | $0.67 \pm 0.06$ | $1.21 \pm 0.10$ |
| I21  | $0.78 \pm 0.08$ | $1.06 \pm 0.10$ | -               | -               |
| Q22  | $0.84 \pm 0.08$ | $0.88 \pm 0.08$ | $0.76 \pm 0.08$ | -               |
| L23  | -               | -               | -               | -               |
| I24  | -               | -               | -               | -               |
| Q25  | -               | -               | -               | -               |
| N26  | -               | -               | -               | -               |
| H27  | $1.54 \pm 0.13$ | $2.06 \pm 0.16$ | $1.25 \pm 0.11$ | $2.78 \pm 0.24$ |
| F28  | -               | -               | -               | -               |
| V29  | $1.78 \pm 0.15$ | $2.07 \pm 0.16$ | $2.54 \pm 0.23$ | $1.69 \pm 0.14$ |
| D30  | $0.67 \pm 0.06$ | -               | $0.82 \pm 0.08$ | -               |
| E31  | -               | -               | -               | -               |
| Y32  | $3.93 \pm 0.35$ | $4.64 \pm 0.4$  | $4.54 \pm 0.39$ | $3.10 \pm 0.2$  |
| D33  | $3.60 \pm 0.26$ | -               | $3.77 \pm 0.33$ | $3.01 \pm 0.26$ |
| P34  | -               | -               | -               | -               |
| T35  | $4.74 \pm 0.4$  | $3.32 \pm 0.26$ | $3.67 \pm 0.33$ | $4.59 \pm 0.4$  |
| I36  | $1.77 \pm 0.15$ | $1.82 \pm 0.15$ | $2.16 \pm 0.19$ | $1.43 \pm 0.13$ |
| E37  | $8.27 \pm 0.65$ | -               | -               | -               |
| D38  | $3.91 \pm 0.34$ | $4.39 \pm 0.39$ | $4.24 \pm 0.36$ | $3.47 \pm 0.31$ |
| S39  | $0.77 \pm 0.08$ | $0.96 \pm 0.09$ | $0.62 \pm 0.06$ | $1.69 \pm 0.15$ |
| Y40  | $2.11 \pm 0.14$ | $2.64 \pm 0.24$ | $2.36 \pm 0.2$  | $1.82 \pm 0.15$ |
| R41  | -               | -               | $0.55 \pm 0.05$ | -               |
| K42  | -               | -               | -               | $0.99 \pm 0.09$ |
| Q43  | -               | -               | -               | $0.95 \pm 0.08$ |



|     |             |             |             |             |
|-----|-------------|-------------|-------------|-------------|
| V44 | -           | -           | -           | -           |
| V45 | -           | -           | -           | -           |
| I46 | -           | -           | -           | -           |
| D47 | -           | -           | -           | -           |
| G48 | -           | -           | -           | -           |
| E49 | -           | -           | -           | -           |
| T50 | -           | -           | -           | -           |
| C51 | -           | -           | -           | -           |
| L52 | 0.97 ± 0.09 | 0.77 ± 0.08 | 0.65 ± 0.06 | 1.57 ± 0.13 |
| L53 | 0.58 ± 0.05 | -           | -           | 0.84 ± 0.06 |
| D54 | 0.97 ± 0.09 | 1.25 ± 0.1  | 0.92 ± 0.08 | 1.02 ± 0.09 |
| I55 | 0.69 ± 0.06 | 1.53 ± 0.13 | 1.04 ± 0.09 | 1.15 ± 0.10 |
| L56 | 1.64 ± 0.14 | -           | 1.91 ± 0.18 | 2.27 ± 0.19 |
| D57 | -           | -           | 6.25 ± 0.54 | 3.21 ± 0.26 |
| T58 | 3.61 ± 0.26 | 4.44 ± 0.38 | 4.00 ± 0.36 | 2.25 ± 0.21 |
| A59 | 2.05 ± 0.14 | 2.79 ± 0.23 | 3.02 ± 0.26 | 1.89 ± 0.18 |
| G60 | 0.93 ± 0.08 | 1.36 ± 0.11 | 2.12 ± 0.19 | -           |
| Q61 | 0.57 ± 0.06 | -           | 0.61 ± 0.05 | 1.34 ± 0.11 |
| E62 | 1.24 ± 0.11 | 1.82 ± 0.14 | 2.24 ± 0.19 | 1.97 ± 0.16 |
| E63 | 0.77 ± 0.08 | -           | -           | -           |
| Y64 | 2.06 ± 0.19 | 2.51 ± 0.21 | 2.27 ± 0.18 | 2.11 ± 0.18 |
| S65 | 1.45 ± 0.13 | 0.64 ± 0.06 | 2.34 ± 0.21 | 0.71 ± 0.08 |
| A66 | 3.85 ± 0.31 | -           | -           | -           |
| M67 | 1.27 ± 0.11 | 0.93 ± 0.08 | 0.61 ± 0.06 | 1.03 ± 0.09 |
| R68 | 0.86 ± 0.08 | 1.29 ± 0.11 | 0.67 ± 0.06 | 0.99 ± 0.1  |
| D69 | 0.80 ± 0.08 | -           | -           | 0.72 ± 0.06 |
| Q70 | -           | 1.16 ± 0.10 | 0.76 ± 0.08 | 1.18 ± 0.11 |
| Y71 | -           | -           | 1.57 ± 0.14 | -           |
| M72 | 1.33 ± 0.10 | -           | 1.58 ± 0.14 | -           |
| R73 | 1.64 ± 0.14 | 4.32 ± 0.34 | 1.27 ± 0.13 | 1.78 ± 0.19 |
| T74 | 3.7 ± 0.26  | 3.41 ± 0.39 | 3.09 ± 0.24 | 2.66 ± 0.21 |
| G75 | 4.05 ± 0.35 | 3.86 ± 0.31 | 3.71 ± 0.31 | 3.01 ± 0.24 |
| E76 | 1.64 ± 0.14 | -           | 0.72 ± 0.06 | 1.06 ± 0.09 |
| G77 | -           | -           | 0.95 ± 0.10 | -           |
| F78 | 0.85 ± 0.08 | -           | -           | -           |
| L79 | 1.46 ± 0.13 | 1.97 ± 0.16 | 1.38 ± 0.13 | 2.12 ± 0.18 |
| C80 | -           | -           | -           | -           |
| V81 | -           | -           | -           | -           |
| F82 | 0.65 ± 0.06 | -           | -           | -           |
| A83 | -           | -           | -           | -           |
| I84 | -           | -           | -           | -           |
| N85 | -           | -           | -           | -           |
| N86 | -           | -           | -           | -           |
| T87 | -           | -           | -           | -           |
| K88 | -           | -           | -           | -           |
| S89 | -           | -           | -           | -           |

|      |             |             |             |             |
|------|-------------|-------------|-------------|-------------|
| F90  | -           | -           | -           | -           |
| E91  | -           | -           | -           | -           |
| D92  | -           | -           | -           | -           |
| I93  | -           | -           | -           | -           |
| H94  | 0.77 ± 0.08 | -           | -           | -           |
| H95  | -           | -           | -           | -           |
| Y96  | -           | -           | -           | -           |
| R97  | 0.96 ± 0.08 | -           | 0.57 ± 0.05 | 0.68 ± 0.06 |
| E98  | -           | -           | -           | -           |
| Q99  | -           | 0.93 ± 0.08 | 0.39 ± 0.04 | 1.00 ± 0.09 |
| I100 | -           | -           | -           | -           |
| K101 | 0.88 ± 0.08 | -           | 0.97 ± 0.09 | 0.92 ± 0.08 |
| R102 | -           | -           | -           | -           |
| V103 | -           | -           | -           | -           |
| K104 | 0.77 ± 0.08 | -           | 0.67 ± 0.06 | 1.00 ± 0.09 |
| D105 | -           | -           | -           | -           |
| S106 | -           | -           | -           | -           |
| E107 | -           | -           | -           | -           |
| D108 | -           | -           | -           | -           |
| V109 | -           | -           | -           | -           |
| P110 | -           | -           | -           | -           |
| M111 | -           | -           | -           | -           |
| V112 | -           | -           | 0.48 ± 0.04 | 0.89 ± 0.06 |
| L113 | -           | -           | -           | -           |
| V114 | -           | -           | -           | -           |
| G115 | -           | -           | -           | -           |
| N116 | -           | -           | -           | -           |
| K117 | -           | -           | -           | -           |
| C118 | -           | -           | -           | -           |
| D119 | -           | -           | -           | -           |
| L120 | -           | -           | -           | -           |
| P121 | -           | -           | -           | -           |
| S122 | -           | -           | -           | -           |
| R123 | -           | -           | -           | -           |
| T124 | -           | -           | -           | 0.89 ± 0.08 |
| V125 | -           | -           | -           | -           |
| D126 | -           | -           | -           | -           |
| T127 | -           | -           | -           | -           |
| K128 | -           | -           | -           | -           |
| Q129 | -           | -           | -           | -           |
| A130 | -           | -           | -           | -           |
| Q131 | -           | -           | -           | -           |
| D132 | -           | -           | -           | -           |
| L133 | -           | -           | -           | -           |
| A134 | -           | -           | -           | -           |
| R135 | -           | -           | -           | -           |

|      |             |             |             |             |
|------|-------------|-------------|-------------|-------------|
| S136 | -           | -           | -           | -           |
| Y137 | -           | -           | -           | -           |
| G138 | -           | -           | -           | -           |
| I139 | -           | -           | -           | -           |
| P140 | -           | -           | -           | -           |
| F141 | 0.82 ± 0.08 | -           | -           | -           |
| I142 | -           | -           | -           | -           |
| E143 | -           | -           | 0.61 ± 0.06 | -           |
| T144 | -           | -           | -           | -           |
| S145 | -           | -           | -           | -           |
| A146 | -           | -           | 0.82 ± 0.08 | -           |
| K147 | -           | -           | -           | -           |
| T148 | -           | -           | -           | -           |
| R149 | -           | 0.91 ± 0.08 | 0.97 ± 0.09 | 1.29 ± 0.10 |
| Q150 | -           | -           | -           | -           |
| G151 | -           | -           | -           | -           |
| V152 | -           | -           | -           | -           |
| D153 | -           | -           | -           | -           |
| D154 | -           | -           | -           | -           |
| A155 | -           | -           | -           | -           |
| F156 | 0.68 ± 0.06 | 0.76 ± 0.08 | -           | -           |
| Y157 | -           | -           | -           | -           |
| T158 | -           | -           | -           | -           |
| L159 | -           | -           | -           | -           |
| V160 | 0.78 ± 0.08 | 1.13 ± 0.09 | 0.84 ± 0.08 | 0.87 ± 0.08 |
| R161 | -           | -           | -           | -           |
| E162 | -           | -           | -           | -           |
| I163 | -           | -           | -           | -           |
| R164 | -           | -           | -           | -           |
| K165 | -           | -           | -           | -           |
| H166 | -           | -           | -           | -           |
| K167 | -           | -           | -           | -           |
| E168 | 0.80 ± 0.06 | -           | 0.53 ± 0.05 | -           |
| K169 | -           | -           | -           | -           |

**Table S5** Exchange parameters derived from  $^{15}\text{N}$ -CEST measurements for wt, G12C, G12D, and G12V K-Ras·Mg $^{2+}$ ·GDP

| Res. | wt K-Ras·Mg $^{2+}$ ·GDP                                            |                                          | G12C K-Ras·Mg $^{2+}$ ·GDP                                          |                                          | G12D K-Ras·Mg $^{2+}$ ·GDP                                          |                                          | G12V K-Ras·Mg $^{2+}$ ·GDP                                          |                                          |
|------|---------------------------------------------------------------------|------------------------------------------|---------------------------------------------------------------------|------------------------------------------|---------------------------------------------------------------------|------------------------------------------|---------------------------------------------------------------------|------------------------------------------|
|      | $^{15}\text{N } \delta/\text{ppm}$                                  | $^{15}\text{N } \Delta\delta/\text{ppm}$ |
|      | $k_{\text{ex}} = 267 \pm 20,$<br>$\rho_{\text{E}} = 3.8 \pm 0.1 \%$ |                                          | $k_{\text{ex}} = 214 \pm 61,$<br>$\rho_{\text{E}} = 1.3 \pm 0.1 \%$ |                                          | $k_{\text{ex}} = 668 \pm 60,$<br>$\rho_{\text{E}} = 2.0 \pm 0.1 \%$ |                                          | $k_{\text{ex}} = 492 \pm 56,$<br>$\rho_{\text{E}} = 1.5 \pm 0.1 \%$ |                                          |
| Y32  | 125.70                                                              | $-4.35 \pm 0.06$                         | -                                                                   | -                                        | 125.66                                                              | $-4.49 \pm 0.11$                         | 126.30                                                              | $-5.11 \pm 0.11$                         |
| D33  | 128.91                                                              | $-3.62 \pm 0.08$                         | -                                                                   | -                                        | 128.61                                                              | $-3.70 \pm 0.14$                         | -                                                                   | -                                        |
| T35  | 110.04                                                              | $3.24 \pm 0.08$                          | 109.46                                                              | $3.73 \pm 0.13$                          | -                                                                   | -                                        | -                                                                   | -                                        |
| E37  | 132.06                                                              | $-7.93 \pm 0.07$                         | 132.89                                                              | $-8.77 \pm 0.12$                         | 131.95                                                              | $-7.95 \pm 0.24$                         | 132.93                                                              | $-8.95 \pm 0.11$                         |
| D38  | 124.50                                                              | $-4.22 \pm 0.05$                         | 124.99                                                              | $-4.77 \pm 0.10$                         | 124.32                                                              | $-4.11 \pm 0.12$                         | 124.97                                                              | $-5.00 \pm 0.08$                         |
| D57  | 129.25                                                              | $-7.27 \pm 0.06$                         | -                                                                   | -                                        | 129.14                                                              | $-7.12 \pm 0.15$                         | -                                                                   | -                                        |
| T58  | 110.24                                                              | $3.69 \pm 0.07$                          | 109.73                                                              | $4.27 \pm 0.12$                          | -                                                                   | -                                        | -                                                                   | -                                        |
| Y64  | 121.22                                                              | $-2.89 \pm 0.06$                         | -                                                                   | -                                        | -                                                                   | -                                        | -                                                                   | -                                        |
| T74  | 108.03                                                              | $2.39 \pm 0.09$                          | -                                                                   | -                                        | 108.03                                                              | $2.57 \pm 0.23$                          | 107.90                                                              | $2.05 \pm 0.31$                          |
| G75  | 111.24                                                              | $-3.75 \pm 0.06$                         | -                                                                   | -                                        | 111.34                                                              | $-4.03 \pm 0.12$                         | 111.58                                                              | $-4.02 \pm 0.10$                         |

**Table S6** Backbone  $^{15}\text{N}$  chemical shift differences between the ground and higher energy state ( $|\Delta\sigma_{\text{EG}}|$ ) as derived from a global fit analysis of CPMG relaxation dispersion measurements of the investigated GTP-bound K-Ras variants with parameters listed in Table 1 of the main text. Unassigned residues due to severe exchange broadening are marked with stars. P-loop (red), switch-I (orange) and switch-II (blue) are colored.

| Res. | wt / ppm        | G12C / ppm      | G12D / ppm      | G12V / ppm      |
|------|-----------------|-----------------|-----------------|-----------------|
| M1   | -               | -               | -               | -               |
| T2   | $0.27 \pm 0.03$ | $0.39 \pm 0.04$ | $0.32 \pm 0.03$ | -               |
| E3   | -               | -               | -               | -               |
| Y4   | -               | -               | -               | $0.60 \pm 0.06$ |
| K5   | -               | -               | -               | -               |
| L6   | $0.48 \pm 0.05$ | $0.67 \pm 0.06$ | $0.64 \pm 0.06$ | $1.04 \pm 0.10$ |
| V7   | $0.49 \pm 0.04$ | $0.64 \pm 0.06$ | $0.30 \pm 0.03$ | $0.77 \pm 0.08$ |
| V8   | ***             | ***             | ***             | ***             |
| V9   | $0.99 \pm 0.08$ | $1.10 \pm 0.10$ | $0.89 \pm 0.08$ | $1.47 \pm 0.13$ |
| G10  | -               | -               | -               | -               |
| A11  | ***             | ***             | ***             | ***             |
| V12  | $0.78 \pm 0.06$ | $1.53 \pm 0.14$ | ***             | $0.32 \pm 0.03$ |
| G13  | ***             | -               | -               | -               |
| V14  | $0.54 \pm 0.05$ | $0.64 \pm 0.06$ | $0.44 \pm 0.04$ | $0.87 \pm 0.08$ |
| G15  | -               | -               | -               | -               |
| K16  | -               | -               | $0.57 \pm 0.05$ | -               |
| S17  | $1.16 \pm 0.1$  | $1.10 \pm 0.10$ | $0.54 \pm 0.05$ | $1.82 \pm 0.16$ |
| A18  | -               | -               | -               | -               |
| L19  | $0.43 \pm 0.04$ | -               | -               | $0.79 \pm 0.08$ |
| T20  | $0.80 \pm 0.07$ | $1.01 \pm 0.09$ | $0.69 \pm 0.06$ | $1.20 \pm 0.10$ |
| I21  | $0.79 \pm 0.08$ | $0.86 \pm 0.08$ | -               | -               |
| Q22  | ***             | ***             | ***             | ***             |
| L23  | $0.51 \pm 0.05$ | $0.63 \pm 0.05$ | -               | $0.79 \pm 0.07$ |
| I24  | -               | -               | -               | -               |
| Q25  | $0.45 \pm 0.04$ | -               | -               | $0.91 \pm 0.08$ |
| N26  | $0.55 \pm 0.05$ | $0.65 \pm 0.05$ | $0.30 \pm 0.03$ | $0.92 \pm 0.08$ |
| H27  | -               | -               | -               | -               |
| F28  | $0.53 \pm 0.03$ | $0.71 \pm 0.06$ | $0.64 \pm 0.06$ | $0.59 \pm 0.05$ |
| V29  | $2.68 \pm 0.23$ | $3.00 \pm 0.26$ | -               | -               |
| D30  | ***             | ***             | ***             | ***             |
| E31  | ***             | ***             | ***             | ***             |
| Y32  | $1.49 \pm 0.14$ | $1.96 \pm 0.18$ | $1.87 \pm 0.18$ | $3.88 \pm 0.35$ |
| D33  | ***             | ***             | ***             | ***             |
| P34  | -               | -               | -               | -               |
| T35  | -               | $2.30 \pm 0.21$ | -               | -               |
| I36  | ***             | ***             | ***             | ***             |
| E37  | ***             | ***             | ***             | ***             |
| D38  | ***             | ***             | ***             | ***             |
| S39  | $1.37 \pm 0.13$ | $1.50 \pm 0.13$ | -               | -               |
| Y40  | $1.56 \pm 0.14$ | $1.50 \pm 0.14$ | $0.38 \pm 0.05$ | $0.74 \pm 0.08$ |
| R41  | $0.42 \pm 0.04$ | -               | -               | -               |
| K42  | -               | -               | -               | $0.68 \pm 0.06$ |

|     |             |             |             |             |
|-----|-------------|-------------|-------------|-------------|
| Q43 | 0.63 ± 0.05 | 0.64 ± 0.06 | 0.67 ± 0.06 | 0.73 ± 0.07 |
| V44 | 0.43 ± 0.05 | -           | 0.41 ± 0.04 | 0.69 ± 0.06 |
| V45 | 0.52 ± 0.05 | 0.55 ± 0.06 | 0.5 ± 0.04  | 0.85 ± 0.08 |
| I46 | -           | -           | -           | -           |
| D47 | -           | -           | -           | -           |
| G48 | -           | -           | -           | -           |
| E49 | -           | -           | -           | 0.41 ± 0.04 |
| T50 | -           | -           | -           | -           |
| C51 | 0.54 ± 0.06 | 0.71 ± 0.06 | 0.60 ± 0.06 | 0.83 ± 0.08 |
| L52 | 0.63 ± 0.05 | 0.68 ± 0.06 | 0.62 ± 0.06 | 1.03 ± 0.09 |
| L53 | -           | -           | -           | -           |
| D54 | ***         | ***         | ***         | ***         |
| I55 | ***         | ***         | ***         | ***         |
| L56 | ***         | ***         | ***         | ***         |
| D57 | ***         | ***         | ***         | ***         |
| T58 | ***         | ***         | ***         | ***         |
| A59 | ***         | ***         | ***         | ***         |
| G60 | ***         | ***         | ***         | ***         |
| Q61 | ***         | ***         | ***         | ***         |
| E62 | ***         | ***         | ***         | ***         |
| E63 | ***         | ***         | ***         | ***         |
| Y64 | ***         | ***         | ***         | ***         |
| S65 | ***         | ***         | ***         | ***         |
| A66 | ***         | ***         | ***         | ***         |
| M67 | ***         | ***         | ***         | ***         |
| R68 | ***         | ***         | ***         | ***         |
| D69 | ***         | ***         | ***         | ***         |
| Q70 | ***         | ***         | ***         | ***         |
| Y71 | ***         | ***         | ***         | ***         |
| M72 | ***         | ***         | ***         | ***         |
| R73 | ***         | ***         | ***         | ***         |
| T74 | 0.81 ± 0.08 | 1.04 ± 0.09 | 1.20 ± 0.11 | 1.66 ± 0.15 |
| G75 | 0.51 ± 0.05 | -           | 0.84 ± 0.07 | -           |
| E76 | -           | -           | -           | 0.45 ± 0.03 |
| G77 | -           | -           | -           | 0.51 ± 0.03 |
| F78 | -           | -           | 0.47 ± 0.04 | 0.47 ± 0.03 |
| L79 | -           | 1.15 ± 0.09 | -           | 2.15 ± 0.18 |
| C80 | 0.45 ± 0.04 | 0.56 ± 0.05 | 0.54 ± 0.04 | 0.63 ± 0.06 |
| V81 | -           | 0.46 ± 0.04 | -           | -           |
| F82 | -           | -           | -           | -           |
| A83 | -           | -           | -           | -           |
| I84 | -           | -           | -           | -           |
| N85 | -           | -           | -           | 0.42 ± 0.03 |
| N86 | -           | -           | -           | -           |
| T87 | ***         | ***         | ***         | ***         |
| K88 | -           | -           | -           | -           |

|      |             |             |             |             |
|------|-------------|-------------|-------------|-------------|
| S89  | 0.30 ± 0.03 | 0.46 ± 0.04 | 0.48 ± 0.04 | 0.6 ± 0.06  |
| F90  | 0.56 ± 0.05 | 0.50 ± 0.05 | 0.57 ± 0.06 | 0.59 ± 0.05 |
| E91  | -           | 0.88 ± 0.08 | -           | 0.52 ± 0.04 |
| D92  | 0.51 ± 0.05 | 0.55 ± 0.05 | 0.80 ± 0.08 | 0.85 ± 0.08 |
| I93  | 1.01 ± 0.1  | 0.91 ± 0.08 | -           | 1.58 ± 0.14 |
| H94  | 0.71 ± 0.06 | -           | 0.89 ± 0.08 | -           |
| H95  | 0.79 ± 0.07 | 0.81 ± 0.08 | 0.85 ± 0.08 | 1.20 ± 0.10 |
| Y96  | 1.22 ± 0.10 | -           | 0.38 ± 0.03 | 0.64 ± 0.05 |
| R97  | 0.41 ± 0.03 | 0.78 ± 0.06 | 0.19 ± 0.03 | 0.43 ± 0.04 |
| E98  | 0.76 ± 0.07 | 0.65 ± 0.06 | 0.27 ± 0.03 | 1.16 ± 0.10 |
| Q99  | -           | -           | ***         | -           |
| I100 | ***         | -           | ***         | -           |
| K101 | 0.51 ± 0.04 | 0.41 ± 0.04 | ***         | 0.77 ± 0.06 |
| R102 | 0.61 ± 0.05 | 0.54 ± 0.05 | ***         | 1.01 ± 0.09 |
| V103 | ***         | ***         | ***         | ***         |
| K104 | -           | -           | -           | -           |
| D105 | -           | -           | -           | -           |
| S106 | -           | -           | -           | -           |
| E107 | -           | -           | -           | -           |
| D108 | -           | -           | -           | -           |
| V109 | -           | -           | -           | -           |
| P110 | -           | -           | -           | -           |
| M111 | 0.40 ± 0.04 | 0.62 ± 0.06 | -           | 0.97 ± 0.08 |
| V112 | ***         | 0.56 ± 0.05 | -           | 0.56 ± 0.05 |
| L113 | 0.48 ± 0.05 | 0.46 ± 0.04 | 0.56 ± 0.06 | 0.73 ± 0.06 |
| V114 | 0.76 ± 0.07 | 0.47 ± 0.04 | 0.59 ± 0.05 | 0.68 ± 0.05 |
| G115 | -           | -           | -           | -           |
| N116 | -           | 0.42 ± 0.04 | -           | -           |
| K117 | -           | -           | -           | -           |
| C118 | -           | -           | -           | -           |
| D119 | 0.46 ± 0.04 | 0.40 ± 0.04 | -           | 0.68 ± 0.05 |
| L120 | -           | -           | -           | -           |
| P121 | -           | -           | -           | -           |
| S122 | -           | -           | -           | -           |
| R123 | -           | -           | -           | -           |
| T124 | -           | -           | -           | -           |
| V125 | -           | -           | -           | -           |
| D126 | -           | -           | -           | -           |
| T127 | -           | -           | -           | -           |
| K128 | -           | -           | -           | -           |
| Q129 | -           | -           | -           | -           |
| A130 | -           | -           | -           | 0.52 ± 0.04 |
| Q131 | 0.41 ± 0.04 | -           | 0.27 ± 0.03 | 0.52 ± 0.03 |
| D132 | -           | -           | -           | -           |
| L133 | -           | -           | -           | -           |
| A134 | -           | -           | -           | -           |

|      |             |             |             |             |
|------|-------------|-------------|-------------|-------------|
| R135 | 0.46 ± 0.03 | -           | -           | -           |
| S136 | -           | -           | -           | -           |
| Y137 | -           | -           | -           | 0.40 ± 0.03 |
| G138 | -           | -           | -           | -           |
| I139 | -           | -           | -           | -           |
| P140 | -           | -           | -           | -           |
| F141 | 0.55 ± 0.04 | -           | 0.29 ± 0.02 | 0.40 ± 0.03 |
| I142 | -           | -           | -           | -           |
| E143 | -           | -           | -           | 0.39 ± 0.03 |
| T144 | 0.55 ± 0.05 | -           | 0.42 ± 0.03 | 0.84 ± 0.07 |
| S145 | -           | -           | -           | -           |
| A146 | -           | -           | -           | -           |
| K147 | 0.48 ± 0.04 | 0.41 ± 0.03 | 0.36 ± 0.04 | -           |
| T148 | -           | -           | -           | -           |
| R149 | 0.87 ± 0.08 | 1.00 ± 0.10 | 0.59 ± 0.05 | 1.53 ± 0.12 |
| Q150 | -           | -           | -           | -           |
| G151 | -           | -           | -           | -           |
| V152 | 0.46 ± 0.04 | -           | 0.50 ± 0.06 | 0.67 ± 0.06 |
| D153 | 0.30 ± 0.03 | -           | 0.58 ± 0.07 | -           |
| D154 | -           | -           | -           | -           |
| A155 | -           | -           | -           | -           |
| F156 | -           | -           | -           | 0.39 ± 0.03 |
| Y157 | 0.4 ± 0.04  | 0.49 ± 0.05 | 0.46 ± 0.04 | 0.56 ± 0.05 |
| T158 | -           | -           | -           | -           |
| L159 | 0.29 ± 0.04 | -           | -           | 0.46 ± 0.03 |
| V160 | -           | -           | -           | -           |
| R161 | 0.51 ± 0.04 | 0.66 ± 0.07 | 0.52 ± 0.05 | 1.16 ± 0.10 |
| E162 | -           | -           | -           | -           |
| I163 | -           | -           | -           | -           |
| R164 | 0.41 ± 0.04 | -           | 0.47 ± 0.04 | -           |
| K165 | 0.43 ± 0.04 | 0.44 ± 0.04 | -           | 0.72 ± 0.06 |
| H166 | -           | -           | -           | -           |
| K167 | -           | -           | -           | -           |
| E168 | -           | -           | -           | 0.31 ± 0.04 |
| K169 | -           | -           | -           | -           |



**Table S7** Experimental fast dynamics parameters ( $R_1$ ,  $R_2$ ,  $R_2/R_1$  and  $^{15}\text{N}\{-^1\text{H}\}$  HetNOE) of  $\text{Mg}^{2+}$ -free K-Ras-G12C-bound GDP recorded at 700 MHz at 298 K. P-loop (red), switch-I (orange) and switch-II (blue) are colored.

| Res. | $\text{Mg}^{2+}$ -free K-Ras-G12C-GDP |                       |             |                                    |
|------|---------------------------------------|-----------------------|-------------|------------------------------------|
|      | $R_1 / \text{s}^{-1}$                 | $R_2 / \text{s}^{-1}$ | $R_2 / R_1$ | $^{15}\text{N}\{-^1\text{H}\}$ NOE |
| M1   |                                       |                       |             |                                    |
| T2   | 1.11 ± 0.03                           | 9.8 ± 0.8             | 8.8 ± 0.7   | 0.52                               |
| E3   | 0.96 ± 0.01                           | 14.0 ± 0.4            | 14.7 ± 0.4  | 0.67                               |
| Y4   | 0.90 ± 0.02                           | 13.3 ± 0.5            | 14.9 ± 0.6  | 0.83                               |
| K5   | 0.85 ± 0.02                           | 12.4 ± 0.3            | 14.5 ± 0.5  | 0.79                               |
| L6   | 0.86 ± 0.02                           | 14.7 ± 0.5            | 17.1 ± 0.7  | 0.78                               |
| V7   | overlapping peaks                     |                       |             |                                    |
| V8   | 0.98 ± 0.03                           | 15.0 ± 0.5            | 15.3 ± 0.7  | 0.83                               |
| V9   | 0.98 ± 0.01                           | 17.2 ± 0.7            | 17.5 ± 0.8  | 0.89                               |
| G10  | 0.95 ± 0.02                           | 15.8 ± 0.2            | 16.7 ± 0.5  | 0.79                               |
| A11  | 0.94 ± 0.04                           | 13.7 ± 0.9            | 14.6 ± 1.1  | 0.92                               |
| C12  | 0.96 ± 0.02                           | 14.3 ± 0.6            | 14.9 ± 0.7  | 0.80                               |
| G13  | 0.91 ± 0.04                           | 15.5 ± 1.2            | 17.1 ± 1.5  | 0.82                               |
| V14  | 0.98 ± 0.01                           | 13.7 ± 0.5            | 14.0 ± 0.6  | 0.78                               |
| G15  | 0.99 ± 0.02                           | 14.3 ± 0.9            | 14.5 ± 1.0  | 0.87                               |
| K16  | 0.95 ± 0.01                           | 15.3 ± 0.8            | 16.2 ± 0.9  | 0.81                               |
| S17  | 0.89 ± 0.02                           | 14.7 ± 0.9            | 16.6 ± 1.1  | 0.84                               |
| A18  | 0.90 ± 0.03                           | 14.6 ± 0.6            | 16.2 ± 0.9  | 0.88                               |
| L19  | 0.95 ± 0.03                           | 16.3 ± 0.2            | 17.2 ± 0.6  | 0.84                               |
| T20  | 0.91 ± 0.03                           | 15.2 ± 0.6            | 16.6 ± 0.8  | 0.81                               |
| I21  | 0.94 ± 0.03                           | 13.0 ± 0.6            | 13.8 ± 0.8  | 0.84                               |
| Q22  | 1.03 ± 0.02                           | 21.0 ± 0.5            | 20.3 ± 0.7  | 0.80                               |
| L23  | 0.93 ± 0.02                           | 14.4 ± 0.4            | 15.5 ± 0.6  | 0.81                               |
| I24  | 0.96 ± 0.01                           | 17.5 ± 0.4            | 18.1 ± 0.5  | 0.89                               |
| Q25  | 0.96 ± 0.04                           | 16.3 ± 1.4            | 17.1 ± 1.6  | 0.81                               |
| N26  | 0.99 ± 0.01                           | 15.4 ± 0.6            | 15.6 ± 0.6  | 0.83                               |
| H27  | N/A                                   | N/A                   | N/A         | N/A                                |
| F28  | 0.95 ± 0.05                           | 13.8 ± 0.9            | 14.6 ± 1.2  | 0.69                               |
| V29  | 1.13 ± 0.02                           | 22.9 ± 0.6            | 20.2 ± 0.6  | 0.63                               |
| D30  | 0.99 ± 0.02                           | 10.5 ± 0.8            | 10.5 ± 0.8  | 0.48                               |
| E31  | overlapping peaks                     |                       |             |                                    |
| Y32  | 1.22 ± 0.03                           | 9.9 ± 0.4             | 8.2 ± 0.4   | 0.46                               |
| D33  | 1.15 ± 0.03                           | 10.2 ± 0.5            | 8.9 ± 0.5   | 0.58                               |
| P34  | N/A                                   | N/A                   | N/A         | N/A                                |
| T35  | 1.17 ± 0.03                           | 11.1 ± 0.2            | 9.5 ± 0.3   | 0.53                               |
| I36  | 1.25 ± 0.04                           | 10.8 ± 0.4            | 8.6 ± 0.4   | 0.61                               |
| E37  | 1.26 ± 0.03                           | 9.2 ± 0.5             | 7.3 ± 0.4   | 0.52                               |
| D38  | 1.23 ± 0.02                           | 9.1 ± 0.4             | 7.4 ± 0.3   | 0.49                               |
| S39  | 1.17 ± 0.03                           | 9.6 ± 0.4             | 8.2 ± 0.4   | 0.54                               |
| Y40  | 1.17 ± 0.02                           | 11.3 ± 1.0            | 9.7 ± 0.8   | 0.62                               |
| R41  | overlapping peaks                     |                       |             |                                    |
| K42  | 0.93 ± 0.02                           | 12.5 ± 0.1            | 13.6 ± 0.3  | 0.75                               |

|     |             |                   |            |      |
|-----|-------------|-------------------|------------|------|
| Q43 | 0.93 ± 0.03 | 15.5 ± 0.9        | 16.6 ± 1.1 | 0.83 |
| V44 | 0.94 ± 0.02 | 14.5 ± 0.5        | 15.4 ± 0.7 | 0.84 |
| V45 | 0.96 ± 0.01 | 12.8 ± 0.3        | 13.4 ± 0.4 | 0.73 |
| I46 | 0.86 ± 0.02 | 14.6 ± 0.7        | 17.0 ± 0.9 | 0.78 |
| D47 | N/A         | N/A               | N/A        | N/A  |
| G48 | 0.91 ± 0.06 | 13.9 ± 1.8        | 15.2 ± 2.3 | 0.77 |
| E49 | 0.95 ± 0.02 | 13.5 ± 0.5        | 14.3 ± 0.6 | 0.78 |
| T50 | 0.91 ± 0.04 | 14.8 ± 1.4        | 16.2 ± 1.7 | 0.78 |
| C51 | 0.99 ± 0.02 | 13.8 ± 0.3        | 14.0 ± 0.4 | 0.84 |
| L52 | 0.90 ± 0.02 | 13.0 ± 0.3        | 14.4 ± 0.4 | 0.77 |
| L53 | 0.88 ± 0.02 | 14.3 ± 1          | 16.1 ± 1.2 | 0.79 |
| D54 |             | overlapping peaks |            |      |
| I55 | 0.84 ± 0.01 | 12.7 ± 0.9        | 15.2 ± 1.0 | 0.75 |
| L56 | 0.93 ± 0.02 | 15.3 ± 0.6        | 16.4 ± 0.7 | 0.85 |
| D57 | 0.94 ± 0.04 | 17.6 ± 1.1        | 18.7 ± 1.4 | 0.66 |
| T58 |             | overlapping peaks |            |      |
| A59 | 1.04 ± 0.01 | 14.0 ± 0.7        | 13.4 ± 0.7 | 0.74 |
| G60 | 1.14 ± 0.08 | 15.0 ± 2.0        | 13.1 ± 2.0 | 0.61 |
| Q61 | 1.09 ± 0.02 | 13.0 ± 0.5        | 11.9 ± 0.6 | 0.69 |
| E62 | 0.91 ± 0.09 | 13.6 ± 1.4        | 14.9 ± 2.1 | 0.66 |
| E63 | 1.14 ± 0.04 | 14.0 ± 0.6        | 12.3 ± 0.7 | 0.58 |
| Y64 |             | overlapping peaks |            |      |
| S65 | N/A         | N/A               | N/A        | N/A  |
| A66 | N/A         | N/A               | N/A        | N/A  |
| M67 | 0.95 ± 0.03 | 14.4 ± 1.3        | 15.2 ± 1.5 | 0.71 |
| R68 |             | overlapping peaks |            |      |
| D69 | 1.01 ± 0.02 | 13.7 ± 0.7        | 13.5 ± 0.8 | 0.73 |
| Q70 |             | overlapping peaks |            |      |
| Y71 | 1.02 ± 0.04 | 15.7 ± 0.8        | 15.4 ± 1.0 | 0.78 |
| M72 | 1.06 ± 0.04 | 17.4 ± 0.3        | 16.4 ± 0.6 | 0.78 |
| R73 |             | overlapping peaks |            |      |
| T74 | 0.98 ± 0.04 | 16.8 ± 0.7        | 17.1 ± 1.0 | 0.76 |
| G75 | 1.00 ± 0.02 | 15.8 ± 0.2        | 15.8 ± 0.3 | 0.86 |
| E76 | 0.95 ± 0.02 | 13.8 ± 0.2        | 14.5 ± 0.4 | 0.86 |
| G77 | 0.90 ± 0.01 | 12.7 ± 0.6        | 14.1 ± 0.6 | 0.81 |
| F78 | 0.97 ± 0.05 | 12.0 ± 0.3        | 12.4 ± 0.7 | 0.85 |
| L79 | 0.94 ± 0.02 | 14.8 ± 0.4        | 15.8 ± 0.5 | 0.86 |
| C80 | 0.88 ± 0.01 | 13.6 ± 0.1        | 15.4 ± 0.3 | 0.76 |
| V81 | 0.89 ± 0.03 | 14.9 ± 0.3        | 16.9 ± 0.6 | 0.82 |
| F82 | 0.97 ± 0.01 | 13.3 ± 0.3        | 13.7 ± 0.3 | 0.88 |
| A83 | 1.01 ± 0.03 | 13.4 ± 0.8        | 13.3 ± 0.9 | 0.78 |
| I84 | 0.90 ± 0.02 | 15.6 ± 1.0        | 17.2 ± 1.1 | 0.84 |
| N85 | 0.97 ± 0.01 | 15.8 ± 0.6        | 16.4 ± 0.6 | 0.90 |
| N86 |             | overlapping peaks |            |      |
| T87 | N/A         | N/A               | N/A        | N/A  |
| K88 | 0.98 ± 0.03 | 14.6 ± 0.7        | 14.9 ± 0.9 | 0.84 |

|      |             |                   |            |      |
|------|-------------|-------------------|------------|------|
| S89  |             | overlapping peaks |            |      |
| F90  | 0.94 ± 0.03 | 15.6 ± 0.4        | 16.7 ± 0.7 | 0.77 |
| E91  | 0.90 ± 0.02 | 14.8 ± 0.5        | 16.4 ± 0.7 | 0.86 |
| D92  | 0.90 ± 0.01 | 13.9 ± 0.3        | 15.4 ± 0.4 | 0.84 |
| I93  | 0.91 ± 0.03 | 14.2 ± 0.9        | 15.6 ± 1.1 | 0.75 |
| H94  | 0.93 ± 0.03 | 15.4 ± 1.5        | 16.6 ± 1.6 | 0.80 |
| H95  | 0.95 ± 0.01 | 13.6 ± 0.3        | 14.4 ± 0.3 | 0.81 |
| Y96  | 0.91 ± 0.02 | 15.7 ± 0.8        | 17.2 ± 0.9 | 0.87 |
| R97  | 0.91 ± 0.01 | 15.3 ± 0.5        | 16.9 ± 0.6 | 0.73 |
| E98  | 0.89 ± 0.02 | 14.7 ± 0.6        | 16.4 ± 0.8 | 0.73 |
| Q99  |             | overlapping peaks |            |      |
| I100 | 0.93 ± 0.01 | 15.2 ± 0.4        | 16.3 ± 0.5 | 0.83 |
| K101 | 0.93 ± 0.01 | 14.7 ± 0.3        | 15.7 ± 0.4 | 0.86 |
| R102 | 0.93 ± 0.01 | 15.4 ± 0.2        | 16.6 ± 0.3 | 0.73 |
| V103 | 0.95 ± 0.01 | 15.3 ± 0.3        | 16.1 ± 0.4 | 0.76 |
| K104 | 0.95 ± 0.01 | 14.5 ± 0.3        | 15.2 ± 0.4 | 0.79 |
| D105 | 0.99 ± 0.03 | 13.3 ± 0.6        | 13.5 ± 0.7 | 0.74 |
| S106 | 0.97 ± 0.02 | 13.6 ± 0.3        | 13.9 ± 0.5 | 0.75 |
| E107 | 0.90 ± 0.07 | 11.2 ± 0.6        | 12.4 ± 1.2 | 0.56 |
| D108 | 0.96 ± 0.03 | 11.1 ± 0.7        | 11.6 ± 0.8 | 0.52 |
| V109 | 0.98 ± 0.03 | 9.4 ± 0.3         | 9.5 ± 0.5  | 0.43 |
| P110 | N/A         | N/A               | N/A        | N/A  |
| M111 | 0.94 ± 0.02 | 13.9 ± 0.4        | 14.7 ± 0.5 | 0.84 |
| V112 | 0.95 ± 0.03 | 14.2 ± 0.4        | 14.9 ± 0.6 | 0.73 |
| L113 | 0.97 ± 0.02 | 14.8 ± 0.2        | 15.3 ± 0.3 | 0.84 |
| V114 | 0.96 ± 0.02 | 15.3 ± 0.3        | 15.9 ± 0.4 | 0.80 |
| G115 | 0.91 ± 0.02 | 13.7 ± 0.3        | 15.1 ± 0.4 | 0.83 |
| N116 | 0.91 ± 0.01 | 13.4 ± 0.6        | 14.8 ± 0.7 | 0.85 |
| K117 | 0.96 ± 0.02 | 16.4 ± 3.1        | 17.2 ± 3.3 | 0.80 |
| C118 | 0.92 ± 0.01 | 14.8 ± 0.6        | 16.0 ± 0.7 | 0.84 |
| D119 | 1.03 ± 0.02 | 15.7 ± 0.8        | 15.3 ± 0.8 | 0.81 |
| L120 | 0.95 ± 0.01 | 14.5 ± 0.8        | 15.2 ± 0.8 | 0.81 |
| P121 | N/A         | N/A               | N/A        | N/A  |
| S122 | 0.87 ± 0.03 | 11.6 ± 0.5        | 13.5 ± 0.8 | 0.69 |
| R123 |             | overlapping peaks |            |      |
| T124 | 0.89 ± 0.04 | 14.0 ± 0.8        | 15.8 ± 1.1 | 0.82 |
| V125 | 0.89 ± 0.02 | 12.8 ± 0.7        | 14.5 ± 0.9 | 0.74 |
| D126 | 0.98 ± 0.01 | 13.7 ± 0.8        | 14.0 ± 0.8 | 0.74 |
| T127 | 0.94 ± 0.02 | 13.3 ± 0.7        | 14.1 ± 0.8 | 0.84 |
| K128 | 1.02 ± 0.02 | 14.1 ± 0.3        | 13.8 ± 0.4 | 0.77 |
| Q129 | 0.94 ± 0.01 | 13.9 ± 0.4        | 14.7 ± 0.5 | 0.73 |
| A130 | 0.97 ± 0.01 | 14.2 ± 0.2        | 14.7 ± 0.2 | 0.82 |
| Q131 | 0.94 ± 0.04 | 15.1 ± 0.3        | 16.0 ± 0.8 | 0.77 |
| D132 | 0.90 ± 0.02 | 14.4 ± 0.3        | 15.9 ± 0.4 | 0.82 |
| L133 | 0.96 ± 0.01 | 14.3 ± 0.4        | 14.8 ± 0.4 | 0.77 |
| A134 | 0.94 ± 0.01 | 14.1 ± 0.3        | 15.1 ± 0.3 | 0.92 |

|      |             |                   |            |      |
|------|-------------|-------------------|------------|------|
| R135 | 0.95 ± 0.01 | 15.6 ± 0.2        | 16.4 ± 0.2 | 0.77 |
| S136 | 0.88 ± 0.02 | 14.6 ± 0.3        | 16.5 ± 0.5 | 0.78 |
| Y137 | 0.87 ± 0.01 | 13.7 ± 0.3        | 15.9 ± 0.4 | 0.84 |
| G138 | 0.92 ± 0.01 | 13.6 ± 0.2        | 14.8 ± 0.2 | 0.85 |
| I139 | 0.9 ± 0.01  | 14.5 ± 0.6        | 16.0 ± 0.7 | 0.84 |
| P140 | N/A         | N/A               | N/A        | N/A  |
| F141 | 0.91 ± 0.01 | 13.4 ± 0.2        | 14.8 ± 0.2 | 0.77 |
| I142 | 0.94 ± 0.01 | 13.5 ± 0.4        | 14.4 ± 0.5 | 0.81 |
| E143 | 0.87 ± 0.01 | 13.1 ± 0.1        | 15.1 ± 0.2 | 0.81 |
| T144 | 0.94 ± 0.03 | 13.9 ± 0.6        | 14.8 ± 0.8 | 0.86 |
| S145 | 0.85 ± 0.03 | 13.2 ± 0.2        | 15.5 ± 0.5 | 0.87 |
| A146 | 0.92 ± 0.04 | 14.5 ± 1.0        | 15.7 ± 1.3 | 0.86 |
| K147 | 0.90 ± 0.02 | 14.9 ± 0.4        | 16.4 ± 0.6 | 0.83 |
| T148 | 0.91 ± 0.03 | 16.2 ± 1.6        | 17.8 ± 1.9 | 0.85 |
| R149 |             | overlapping peaks |            |      |
| Q150 | 0.86 ± 0.02 | 13.9 ± 0.9        | 16.2 ± 1.1 | 0.68 |
| G151 | 0.97 ± 0.04 | 13.7 ± 0.6        | 14.2 ± 0.9 | 0.78 |
| V152 | 0.98 ± 0.01 | 14.6 ± 0.5        | 14.9 ± 0.5 | 0.90 |
| D153 | 0.93 ± 0.02 | 14.5 ± 0.4        | 15.5 ± 0.5 | 0.85 |
| D154 |             | overlapping peaks |            |      |
| A155 |             | overlapping peaks |            |      |
| F156 | 0.93 ± 0.01 | 13.5 ± 0.8        | 14.5 ± 0.8 | 0.76 |
| Y157 | 0.90 ± 0.01 | 15.3 ± 0.5        | 17.0 ± 0.5 | 0.88 |
| T158 | 0.90 ± 0.01 | 15.5 ± 0.4        | 17.2 ± 0.5 | 0.83 |
| L159 | 0.94 ± 0.02 | 14.6 ± 0.3        | 15.4 ± 0.5 | 0.84 |
| V160 | 0.91 ± 0.02 | 14.6 ± 0.6        | 16.0 ± 0.7 | 0.88 |
| R161 | 0.95 ± 0.02 | 14.9 ± 0.8        | 15.7 ± 0.9 | 0.77 |
| E162 | 0.92 ± 0.03 | 15.4 ± 0.1        | 16.7 ± 0.6 | 0.80 |
| I163 | 0.97 ± 0.02 | 14.4 ± 0.7        | 14.9 ± 0.8 | 0.83 |
| R164 | 0.92 ± 0.02 | 15.2 ± 0.3        | 16.5 ± 0.4 | 0.88 |
| K165 | 0.94 ± 0.01 | 14.5 ± 0.3        | 15.4 ± 0.4 | 0.77 |
| H166 |             | overlapping peaks |            |      |
| K167 |             | overlapping peaks |            |      |
| E168 | 1.07 ± 0.03 | 10.2 ± 0.4        | 9.5 ± 0.5  | 0.50 |
| K169 | 1.24 ± 0.01 | 5.9 ± 0.3         | 4.8 ± 0.2  | 0.05 |

**Table S8** Extended model-free parameters ( $S^2$ ,  $S^2_{s_s}$ ,  $S^2_{f_f}$ ,  $\tau_e$ ,  $R_{ex}$ ) of Mg<sup>2+</sup>-free K-Ras-G12C-bound GDP recorded at 700 MHz at 298 K. P-loop (red), switch-I (orange) and switch-II (blue) are colored.

| Res. | Mg <sup>2+</sup> -free K-Ras-G12C-GDP |             |             |               |                            |
|------|---------------------------------------|-------------|-------------|---------------|----------------------------|
|      | $S^2$                                 | $S^2_{s_s}$ | $S^2_{f_f}$ | $\tau_e$ / ps | $R_{ex}$ / s <sup>-1</sup> |
| M1   | N/A                                   | N/A         | N/A         | N/A           | N/A                        |
| T2   | 0.54 ± 0.04                           | 0.79 ± 0.04 | 0.69 ± 0.04 | 1000 ± 126    | -                          |
| E3   | 0.83 ± 0.01                           | 1           | 0.83 ± 0.01 | 42 ± 9        | -                          |
| Y4   | 0.81 ± 0.02                           | 1           | 0.81 ± 0.02 | -             | -                          |
| K5   | 0.76 ± 0.01                           | 1           | 0.76 ± 0.01 | -             | -                          |
| L6   | 0.78 ± 0.02                           | 1           | 0.78 ± 0.02 | -             | 1.6 ± 0.6                  |
| V7   | overlapping peaks                     |             |             |               |                            |
| V8   | 0.89 ± 0.02                           | 1           | 0.89 ± 0.02 | -             | -                          |
| V9   | 0.89 ± 0.01                           | 1           | 0.89 ± 0.01 | -             | 2.3 ± 0.8                  |
| G10  | 0.86 ± 0.02                           | 1           | 0.86 ± 0.02 | -             | 1.4 ± 0.4                  |
| A11  | 0.84 ± 0.03                           | 1           | 0.84 ± 0.03 | -             | -                          |
| C12  | 0.87 ± 0.02                           | 1           | 0.87 ± 0.02 | -             | -                          |
| G13  | 0.85 ± 0.03                           | 1           | 0.85 ± 0.03 | -             | -                          |
| V14  | 0.88 ± 0.01                           | 1           | 0.88 ± 0.01 | -             | -                          |
| G15  | 0.89 ± 0.02                           | 1           | 0.89 ± 0.02 | -             | -                          |
| K16  | 0.86 ± 0.01                           | 1           | 0.86 ± 0.01 | -             | -                          |
| S17  | 0.82 ± 0.02                           | 1           | 0.82 ± 0.02 | -             | -                          |
| A18  | 0.83 ± 0.02                           | 1           | 0.83 ± 0.02 | -             | -                          |
| L19  | 0.86 ± 0.03                           | 1           | 0.86 ± 0.03 | -             | 1.9 ± 0.5                  |
| T20  | 0.85 ± 0.02                           | 1           | 0.85 ± 0.02 | -             | -                          |
| I21  | 0.83 ± 0.02                           | 1           | 0.83 ± 0.02 | -             | -                          |
| Q22  | 0.94 ± 0.02                           | 1           | 0.94 ± 0.02 | -             | 5.3 ± 0.6                  |
| L23  | 0.85 ± 0.02                           | 1           | 0.85 ± 0.02 | -             | -                          |
| I24  | 0.87 ± 0.01                           | 1           | 0.87 ± 0.01 | -             | 2.8 ± 0.5                  |
| Q25  | 0.89 ± 0.04                           | 1           | 0.89 ± 0.04 | -             | -                          |
| N26  | 0.90 ± 0.01                           | 1           | 0.90 ± 0.01 | -             | -                          |
| H27  | N/A                                   | N/A         | N/A         | N/A           | N/A                        |
| F28  | 0.82 ± 0.03                           | 1           | 0.82 ± 0.03 | 34 ± 13       | -                          |
| V29  | 0.91 ± 0.02                           | 1           | 0.91 ± 0.02 | 482 ± 104     | 7.5 ± 0.7                  |
| D30  | 0.60 ± 0.04                           | 0.79 ± 0.03 | 0.76 ± 0.04 | 745 ± 121     | -                          |
| E31  | overlapping peaks                     |             |             |               |                            |
| Y32  | 0.55 ± 0.03                           | 0.85 ± 0.02 | 0.64 ± 0.02 | 954 ± 89      | -                          |
| D33  | 0.57 ± 0.03                           | 0.81 ± 0.03 | 0.7 ± 0.03  | 1116 ± 142    | -                          |
| P34  | N/A                                   | N/A         | N/A         | N/A           | N/A                        |
| T35  | 0.63 ± 0.02                           | 0.87 ± 0.02 | 0.72 ± 0.02 | 948 ± 106     | -                          |
| I36  | 0.60 ± 0.03                           | 0.85 ± 0.03 | 0.70 ± 0.02 | 1252 ± 175    | -                          |
| E37  | 0.49 ± 0.03                           | 0.82 ± 0.03 | 0.60 ± 0.03 | 1132 ± 115    | -                          |
| D38  | 0.49 ± 0.02                           | 0.82 ± 0.02 | 0.60 ± 0.02 | 1075 ± 102    | -                          |
| S39  | 0.53 ± 0.03                           | 0.80 ± 0.02 | 0.66 ± 0.02 | 1094 ± 120    | -                          |
| Y40  | 0.64 ± 0.05                           | 0.85 ± 0.04 | 0.75 ± 0.04 | 1153 ± 198    | -                          |
| R41  | overlapping peaks                     |             |             |               |                            |
| K42  | N/A                                   | N/A         | N/A         | N/A           | N/A                        |

|     |             |             |                   |            |           |
|-----|-------------|-------------|-------------------|------------|-----------|
| Q43 | 0.86 ± 0.02 | 1           | 0.86 ± 0.02       | -          | -         |
| V44 | 0.86 ± 0.02 | 1           | 0.86 ± 0.02       | -          | -         |
| V45 | N/A         | N/A         | N/A               | N/A        | N/A       |
| I46 | 0.79 ± 0.02 | 1           | 0.79 ± 0.02       | -          | -         |
| D47 | N/A         | N/A         | N/A               | N/A        | N/A       |
| G48 | 0.83 ± 0.05 | 1           | 0.83 ± 0.05       | -          | -         |
| E49 | 0.84 ± 0.02 | 1           | 0.84 ± 0.02       | -          | -         |
| T50 | 0.84 ± 0.04 | 1           | 0.84 ± 0.04       | -          | -         |
| C51 | 0.86 ± 0.01 | 1           | 0.86 ± 0.01       | -          | -         |
| L52 | 0.79 ± 0.01 | 1           | 0.79 ± 0.01       | -          | -         |
| L53 | 0.80 ± 0.01 | 1           | 0.80 ± 0.01       | -          | -         |
| D54 |             |             | overlapping peaks |            |           |
| I55 | 0.76 ± 0.01 | 1           | 0.76 ± 0.01       | -          | -         |
| L56 | 0.86 ± 0.02 | 1           | 0.86 ± 0.02       | -          | -         |
| D57 | 0.81 ± 0.03 | 1           | 0.81 ± 0.03       | 39 ± 12    | 3.9 ± 1.3 |
| T58 |             |             | overlapping peaks |            |           |
| A59 | 0.94 ± 0.01 | 1           | 0.94 ± 0.01       | -          | -         |
| G60 | 0.89 ± 0.06 | 1           | 0.89 ± 0.06       | 537 ± 367  | -         |
| Q61 | 0.76 ± 0.03 | 0.88 ± 0.03 | 0.86 ± 0.02       | 1047 ± 246 | -         |
| E62 | 0.80 ± 0.06 | 1           | 0.80 ± 0.06       | 34 ± 15    | -         |
| E63 | 0.86 ± 0.03 | 1           | 0.86 ± 0.03       | 571 ± 136  | -         |
| Y64 |             |             | overlapping peaks |            |           |
| S65 | N/A         | N/A         | N/A               | N/A        | N/A       |
| A66 | N/A         | N/A         | N/A               | N/A        | N/A       |
| M67 | 0.83 ± 0.03 | 1           | 0.83 ± 0.03       | 32 ± 12    | -         |
| R68 |             |             | overlapping peaks |            |           |
| D69 | 0.90 ± 0.02 | 1           | 0.90 ± 0.02       | -          | -         |
| Q70 |             |             | overlapping peaks |            |           |
| Y71 | 0.93 ± 0.03 | 1           | 0.93 ± 0.03       | -          | -         |
| M72 | 1.00 ± 0.02 | 1           | 1.00 ± 0.02       | -          | -         |
| R73 |             |             | overlapping peaks |            |           |
| T74 | 0.93 ± 0.03 | 1           | 0.93 ± 0.03       | -          | -         |
| G75 | 0.92 ± 0.01 | 1           | 0.92 ± 0.01       | -          | -         |
| E76 | 0.83 ± 0.01 | 1           | 0.83 ± 0.01       | -          | -         |
| G77 | 0.81 ± 0.01 | 1           | 0.81 ± 0.01       | -          | -         |
| F78 | 0.74 ± 0.02 | 1           | 0.74 ± 0.02       | -          | -         |
| L79 | 0.86 ± 0.01 | 1           | 0.86 ± 0.01       | -          | -         |
| C80 | 0.81 ± 0.01 | 1           | 0.81 ± 0.01       | -          | -         |
| V81 | 0.80 ± 0.02 | 1           | 0.80 ± 0.02       | -          | 1.5 ± 0.5 |
| F82 | N/A         | N/A         | N/A               | N/A        | N/A       |
| A83 | 0.89 ± 0.02 | 1           | 0.89 ± 0.02       | -          | -         |
| I84 | 0.83 ± 0.02 | 1           | 0.83 ± 0.02       | -          | -         |
| N85 | 0.88 ± 0.01 | 1           | 0.88 ± 0.01       | -          | -         |
| N86 |             |             | overlapping peaks |            |           |
| T87 | N/A         | N/A         | N/A               | N/A        | N/A       |
| K88 | 0.88 ± 0.02 | 1           | 0.88 ± 0.02       | -          | -         |

|      |             |             |                   |           |           |
|------|-------------|-------------|-------------------|-----------|-----------|
| S89  |             |             | overlapping peaks |           |           |
| F90  | 0.88 ± 0.02 | 1           | 0.88 ± 0.02       | -         | -         |
| E91  | 0.83 ± 0.01 | 1           | 0.83 ± 0.01       | -         | -         |
| D92  | 0.82 ± 0.01 | 1           | 0.82 ± 0.01       | -         | -         |
| I93  | 0.83 ± 0.03 | 1           | 0.83 ± 0.03       | -         | -         |
| H94  | 0.85 ± 0.02 | 1           | 0.85 ± 0.02       | -         | -         |
| H95  | 0.85 ± 0.01 | 1           | 0.85 ± 0.01       | -         | -         |
| Y96  | 0.84 ± 0.01 | 1           | 0.84 ± 0.01       | -         | -         |
| R97  | 0.83 ± 0.01 | 1           | 0.83 ± 0.01       | -         | -         |
| E98  | 0.82 ± 0.02 | 1           | 0.82 ± 0.02       | -         | -         |
| Q99  |             |             | overlapping peaks |           |           |
| I100 | 0.86 ± 0.01 | 1           | 0.86 ± 0.01       | -         | -         |
| K101 | 0.85 ± 0.01 | 1           | 0.85 ± 0.01       | -         | -         |
| R102 | 0.82 ± 0.01 | 1           | 0.82 ± 0.01       | 24 ± 9    | 1.7 ± 0.3 |
| V103 | 0.87 ± 0.01 | 1           | 0.87 ± 0.01       | -         | -         |
| K104 | 0.86 ± 0.01 | 1           | 0.86 ± 0.01       | -         | -         |
| D105 | 0.85 ± 0.02 | 1           | 0.85 ± 0.02       | -         | -         |
| S106 | 0.84 ± 0.01 | 1           | 0.84 ± 0.01       | -         | -         |
| E107 | N/A         | N/A         | N/A               | N/A       | N/A       |
| D108 | 0.65 ± 0.04 | 0.79 ± 0.03 | 0.81 ± 0.03       | 669 ± 133 | -         |
| V109 | 0.53 ± 0.02 | 0.75 ± 0.02 | 0.71 ± 0.02       | 780 ± 80  | -         |
| P110 | N/A         | N/A         | N/A               | N/A       | N/A       |
| M111 | 0.85 ± 0.01 | 1           | 0.85 ± 0.01       | -         | -         |
| V112 | 0.85 ± 0.02 | 1           | 0.85 ± 0.02       | -         | -         |
| L113 | 0.88 ± 0.01 | 1           | 0.88 ± 0.01       | -         | -         |
| V114 | 0.89 ± 0.01 | 1           | 0.89 ± 0.01       | -         | -         |
| G115 | 0.82 ± 0.01 | 1           | 0.82 ± 0.01       | -         | -         |
| N116 | 0.82 ± 0.01 | 1           | 0.82 ± 0.01       | -         | -         |
| K117 | 0.87 ± 0.02 | 1           | 0.87 ± 0.02       | -         | -         |
| C118 | 0.84 ± 0.01 | 1           | 0.84 ± 0.01       | -         | -         |
| D119 | 0.93 ± 0.01 | 1           | 0.93 ± 0.01       | -         | -         |
| L120 | 0.86 ± 0.01 | 1           | 0.86 ± 0.01       | -         | -         |
| P121 | N/A         | N/A         | N/A               | N/A       | N/A       |
| S122 | 0.73 ± 0.02 | 1           | 0.73 ± 0.02       | 22 ± 6    | -         |
| R123 |             |             | overlapping peaks |           |           |
| T124 | 0.82 ± 0.03 | 1           | 0.82 ± 0.03       | -         | -         |
| V125 | 0.8 ± 0.02  | 1           | 0.8 ± 0.02        | -         | -         |
| D126 | 0.86 ± 0.01 | 1           | 0.86 ± 0.01       | 34 ± 12   | -         |
| T127 | 0.85 ± 0.02 | 1           | 0.85 ± 0.02       | -         | -         |
| K128 | 0.89 ± 0.01 | 1           | 0.89 ± 0.01       | -         | -         |
| Q129 | 0.83 ± 0.01 | 1           | 0.83 ± 0.01       | 28 ± 10   | -         |
| A130 | 0.87 ± 0.01 | 1           | 0.87 ± 0.01       | -         | -         |
| Q131 | 0.89 ± 0.01 | 1           | 0.89 ± 0.01       | -         | -         |
| D132 | 0.84 ± 0.01 | 1           | 0.84 ± 0.01       | -         | -         |
| L133 | 0.87 ± 0.01 | 1           | 0.87 ± 0.01       | -         | -         |
| A134 | 0.85 ± 0.01 | 1           | 0.85 ± 0.01       | -         | -         |

|      |             |            |                   |          |           |
|------|-------------|------------|-------------------|----------|-----------|
| R135 | 0.86 ± 0.01 | 1          | 0.86 ± 0.01       | -        | 1.2 ± 0.2 |
| S136 | 0.83 ± 0.01 | 1          | 0.83 ± 0.01       | -        | -         |
| Y137 | 0.80 ± 0.01 | 1          | 0.80 ± 0.01       | -        | -         |
| G138 | 0.82 ± 0.01 | 1          | 0.82 ± 0.01       | -        | -         |
| I139 | 0.82 ± 0.01 | 1          | 0.82 ± 0.01       | -        | -         |
| P140 | N/A         | N/A        | N/A               | N/A      | N/A       |
| F141 | 0.80 ± 0.01 | 1          | 0.80 ± 0.01       | 18 ± 7   | -         |
| I142 | 0.85 ± 0.01 | 1          | 0.85 ± 0.01       | -        | -         |
| E143 | 0.78 ± 0.01 | 1          | 0.78 ± 0.01       | -        | -         |
| T144 | 0.84 ± 0.02 | 1          | 0.84 ± 0.02       | -        | -         |
| S145 | 0.78 ± 0.01 | 1          | 0.78 ± 0.01       | -        | -         |
| A146 | 0.84 ± 0.03 | 1          | 0.84 ± 0.03       | -        | -         |
| K147 | 0.84 ± 0.02 | 1          | 0.84 ± 0.02       | -        | -         |
| T148 | 0.83 ± 0.02 | 1          | 0.83 ± 0.02       | -        | -         |
| R149 |             |            | overlapping peaks |          |           |
| Q150 | 0.78 ± 0.02 | 1          | 0.78 ± 0.02       | -        | -         |
| G151 | 0.85 ± 0.03 | 1          | 0.85 ± 0.03       | -        | -         |
| V152 | 0.88 ± 0.01 | 1          | 0.88 ± 0.01       | -        | -         |
| D153 | 0.85 ± 0.02 | 1          | 0.85 ± 0.02       | -        | -         |
| D154 |             |            | overlapping peaks |          |           |
| A155 |             |            | overlapping peaks |          |           |
| F156 | 0.84 ± 0.01 | 1          | 0.84 ± 0.01       | -        | -         |
| Y157 | 0.82 ± 0.01 | 1          | 0.82 ± 0.01       | -        | 1.6 ± 0.5 |
| T158 | 0.82 ± 0.01 | 1          | 0.82 ± 0.01       | -        | 1.8 ± 0.4 |
| L159 | 0.86 ± 0.01 | 1          | 0.86 ± 0.01       | -        | -         |
| V160 | 0.83 ± 0.01 | 1          | 0.83 ± 0.01       | -        | -         |
| R161 | 0.86 ± 0.02 | 1          | 0.86 ± 0.02       | -        | -         |
| E162 | 0.91 ± 0.01 | 1          | 0.91 ± 0.01       | -        | -         |
| I163 | 0.87 ± 0.02 | 1          | 0.87 ± 0.02       | -        | -         |
| R164 | 0.83 ± 0.01 | 1          | 0.83 ± 0.01       | -        | 1.2 ± 0.3 |
| K165 | 0.86 ± 0.01 | 1          | 0.86 ± 0.01       | -        | -         |
| H166 |             |            | overlapping peaks |          |           |
| K167 |             |            | overlapping peaks |          |           |
| E168 | 0.58 ± 0.03 | 0.8 ± 0.02 | 0.72 ± 0.02       | 888 ± 99 | -         |
| K169 | N/A         | N/A        | N/A               | N/A      | N/A       |



## Supplementary figures

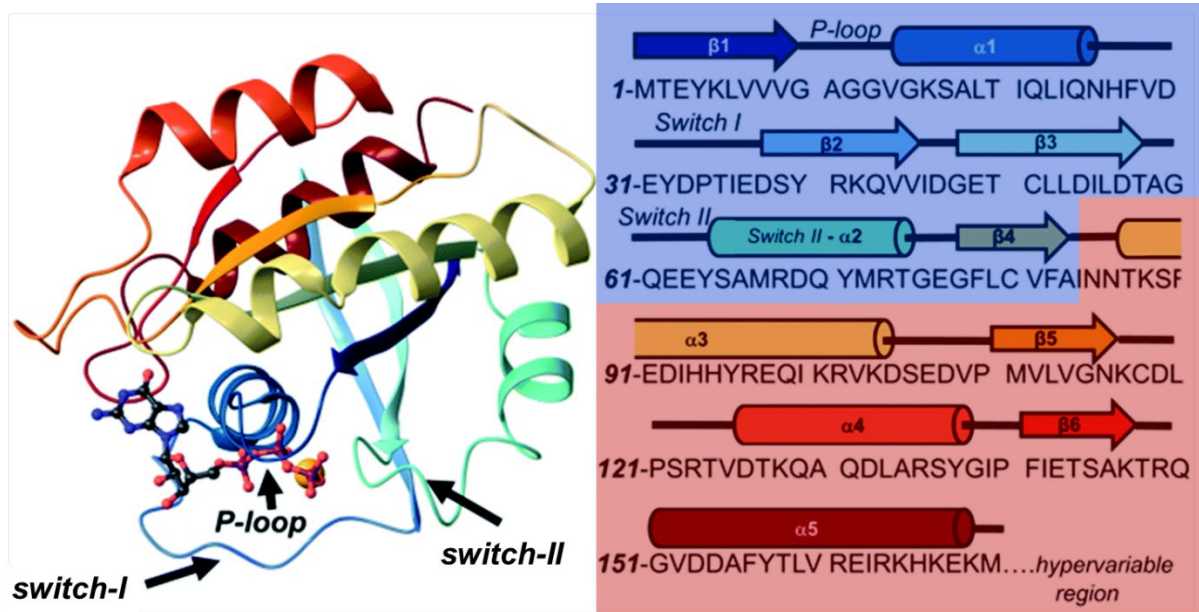

**Figure S1** 3D structure of GTP-bound G-domain of K-Ras-wt and its sequence showing the secondary structural elements. The effector lobe is colored blue (and secondary structure elements are shown in shades of blue) and the allosteric lobe is red (secondary structure elements are shown in shades of red). The structure is derived from our previous MD-simulation study.<sup>[2]</sup>

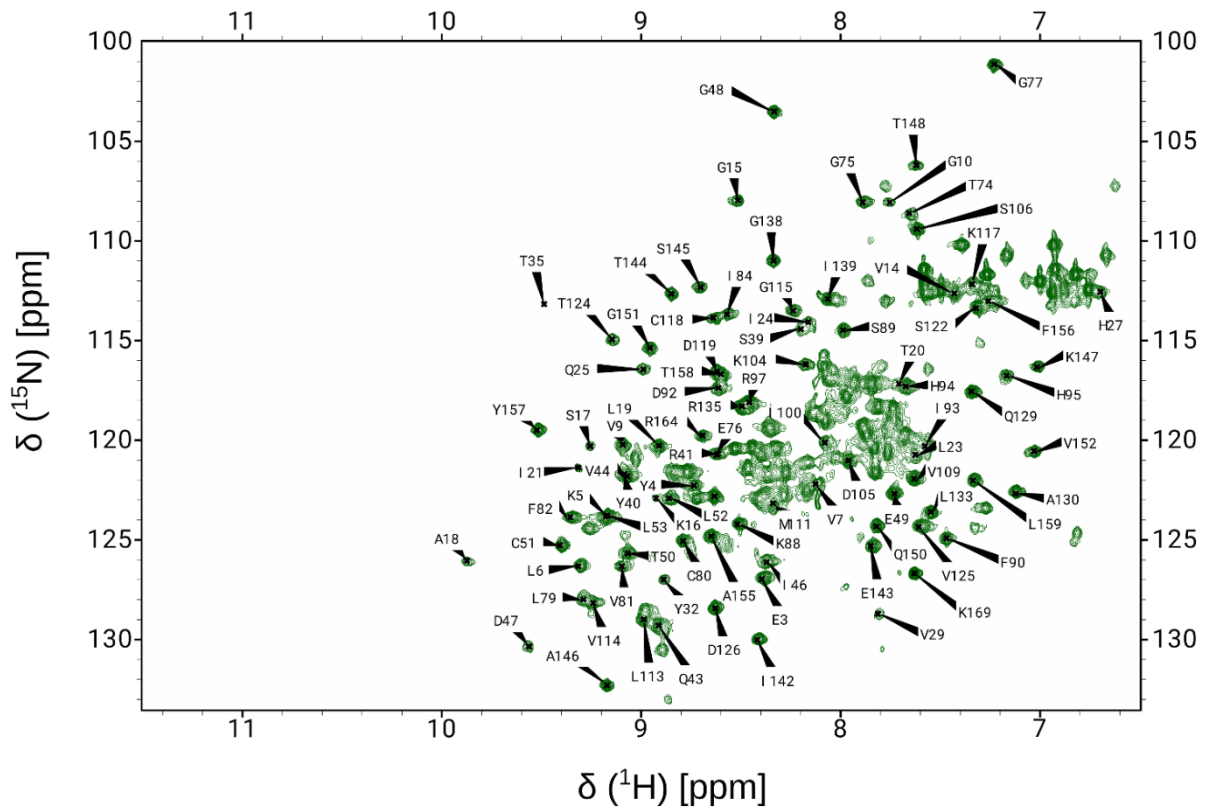

**Figure S2** Assigned  $^1\text{H},^{15}\text{N}$ -HSQC spectrum of G12V K-Ras·Mg $^{2+}$ ·GTP. The assignments are shown partially with the full assignment deposited in BMRB, access number: 50773.

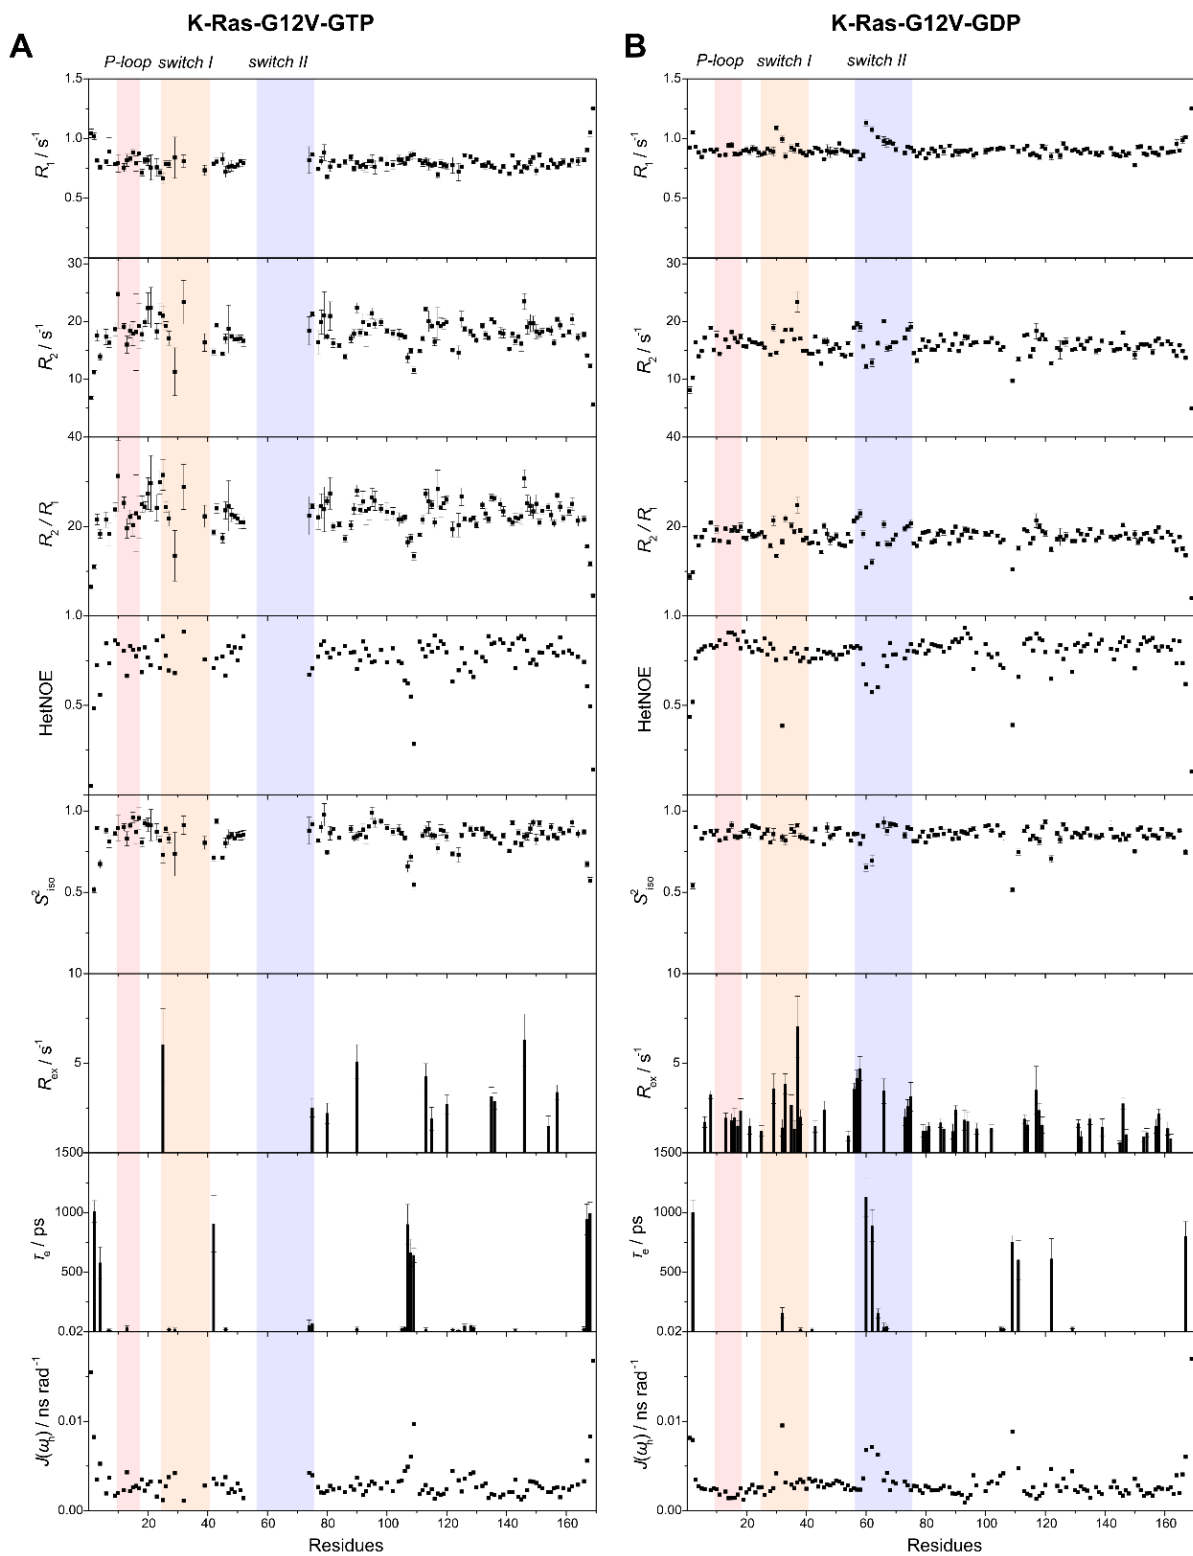

**Figure S3** Relaxation data ( $R_1$ ,  $R_2$ ,  $^{15}\text{N}\{-^1\text{H}\}$  HetNOE) and their analysis by Lipari-Szabo model-free formalism ( $S^2$ ,  $R_{\text{ex}}$ ,  $\tau_e$ ) and reduced spectral density mapping ( $J(\omega_H)$ ) of G12V K-Ras in its (A) GTP- and (B) GDP-bound form as a function of the residue number. Regions of the P-loop (pink, residues 10-17), switch-I (orange, residues 25-40), and switch-II (blue, residues 57-75) are depicted.

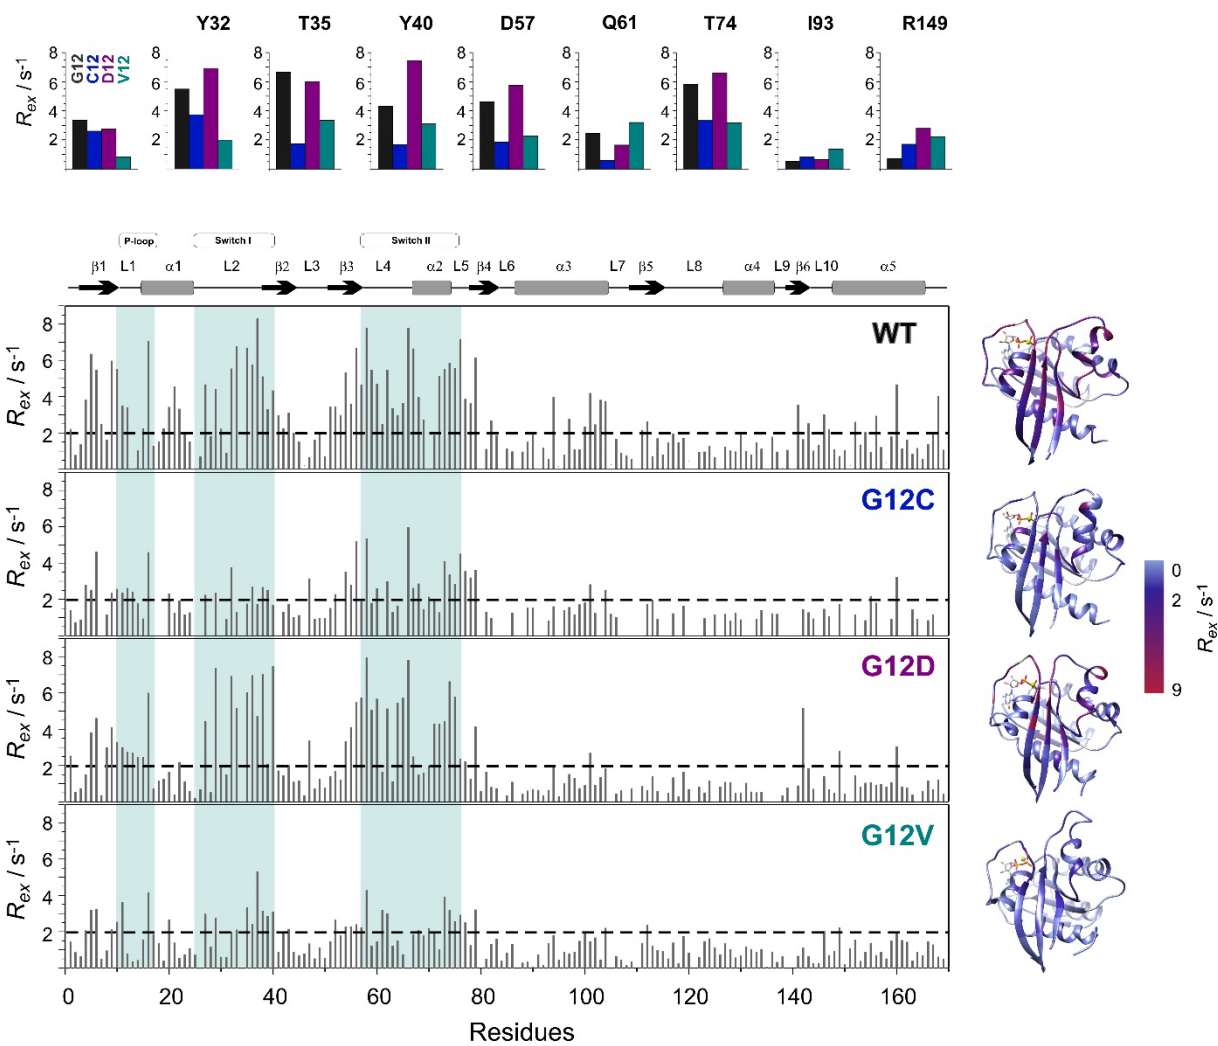

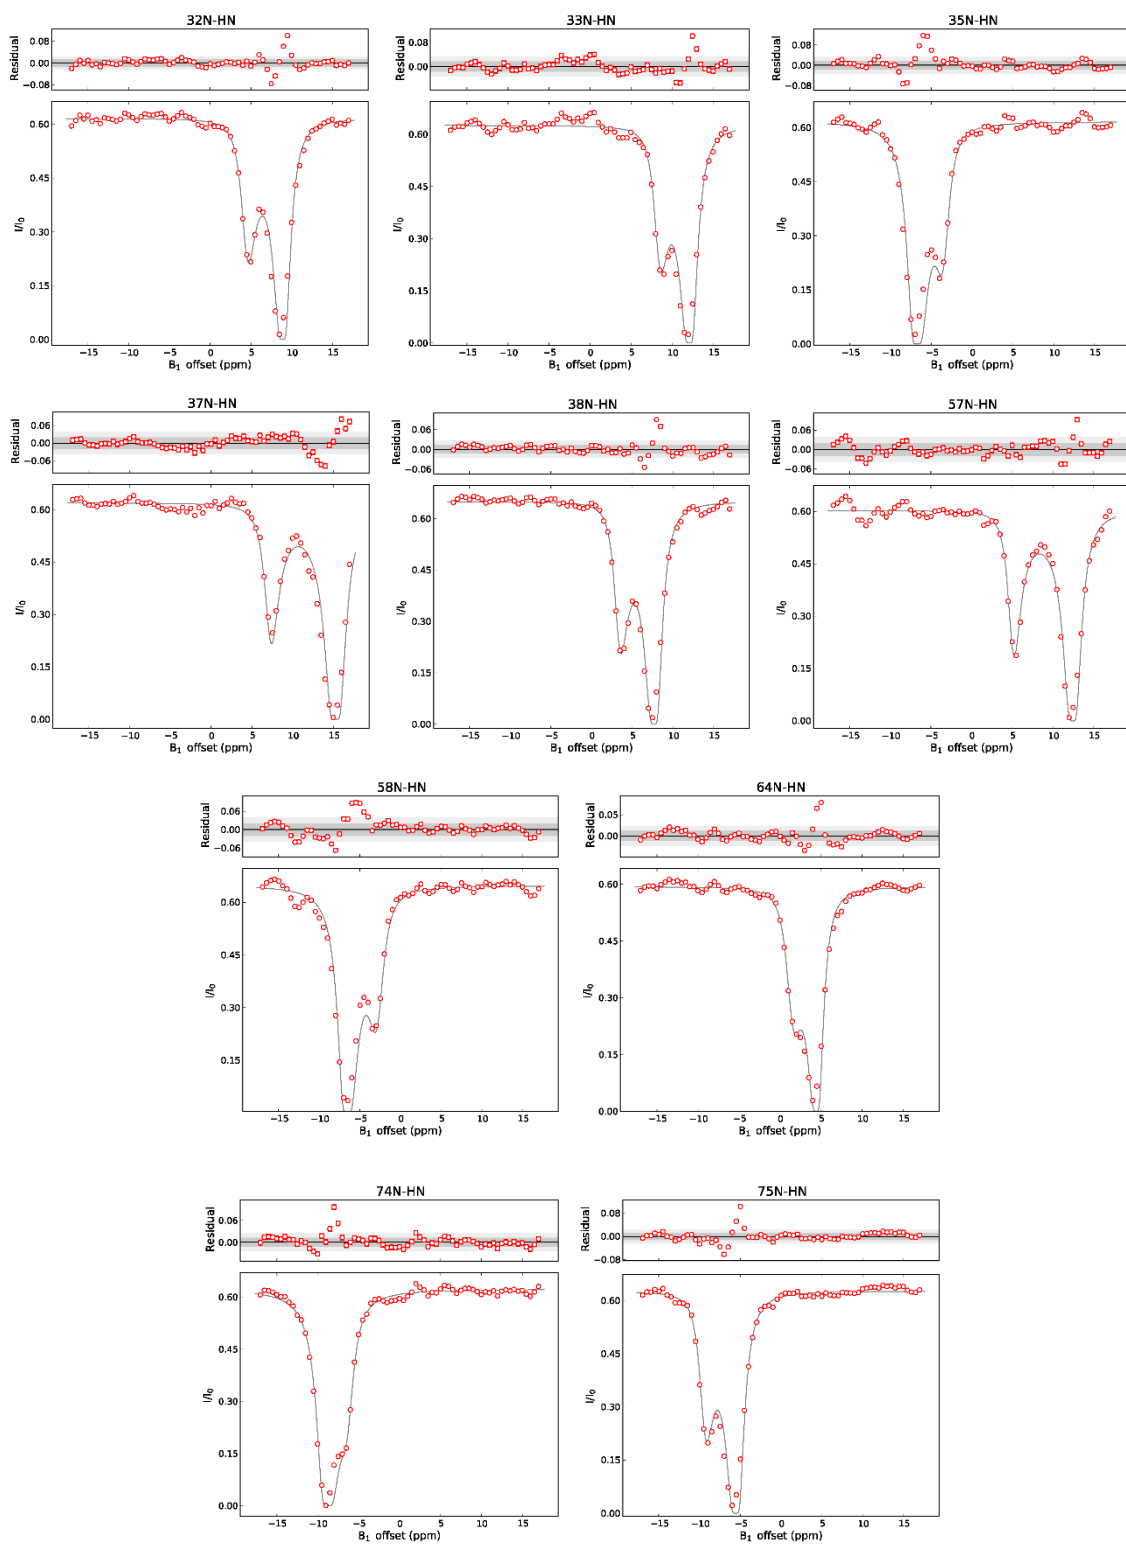

**Figure S5** Plot of the fits of  $^{15}\text{N}$ -CEST experiments of wt K-Ras- $\text{Mg}^{2+}$ -GDP. Numerical results of the fits are shown in Table S5.

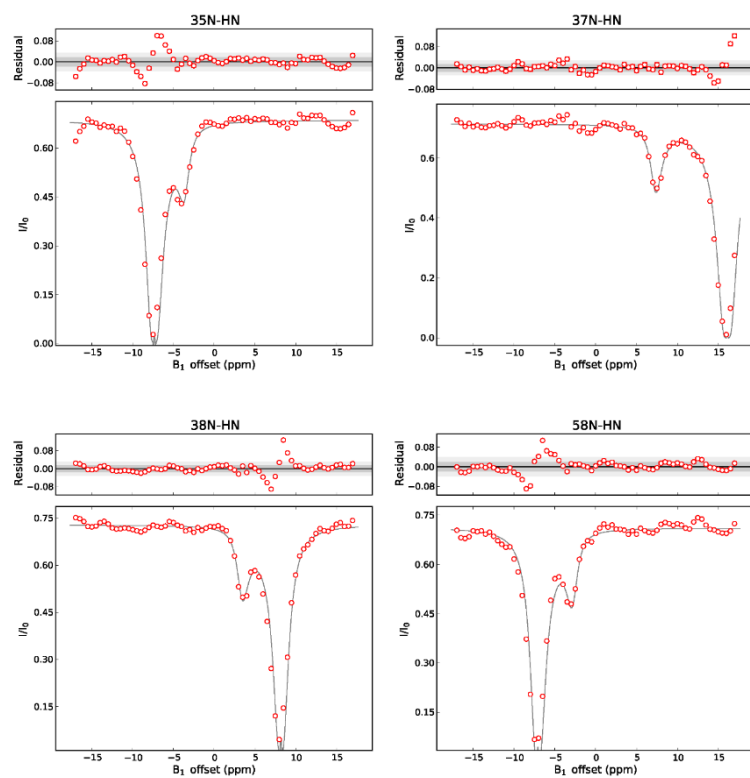

**Figure S6** Plot of the fits of  $^{15}\text{N}$ -CEST experiments of G12C K-Ras-Mg $^{2+}$ -GDP. Numerical results of the fits are shown in Table S5.

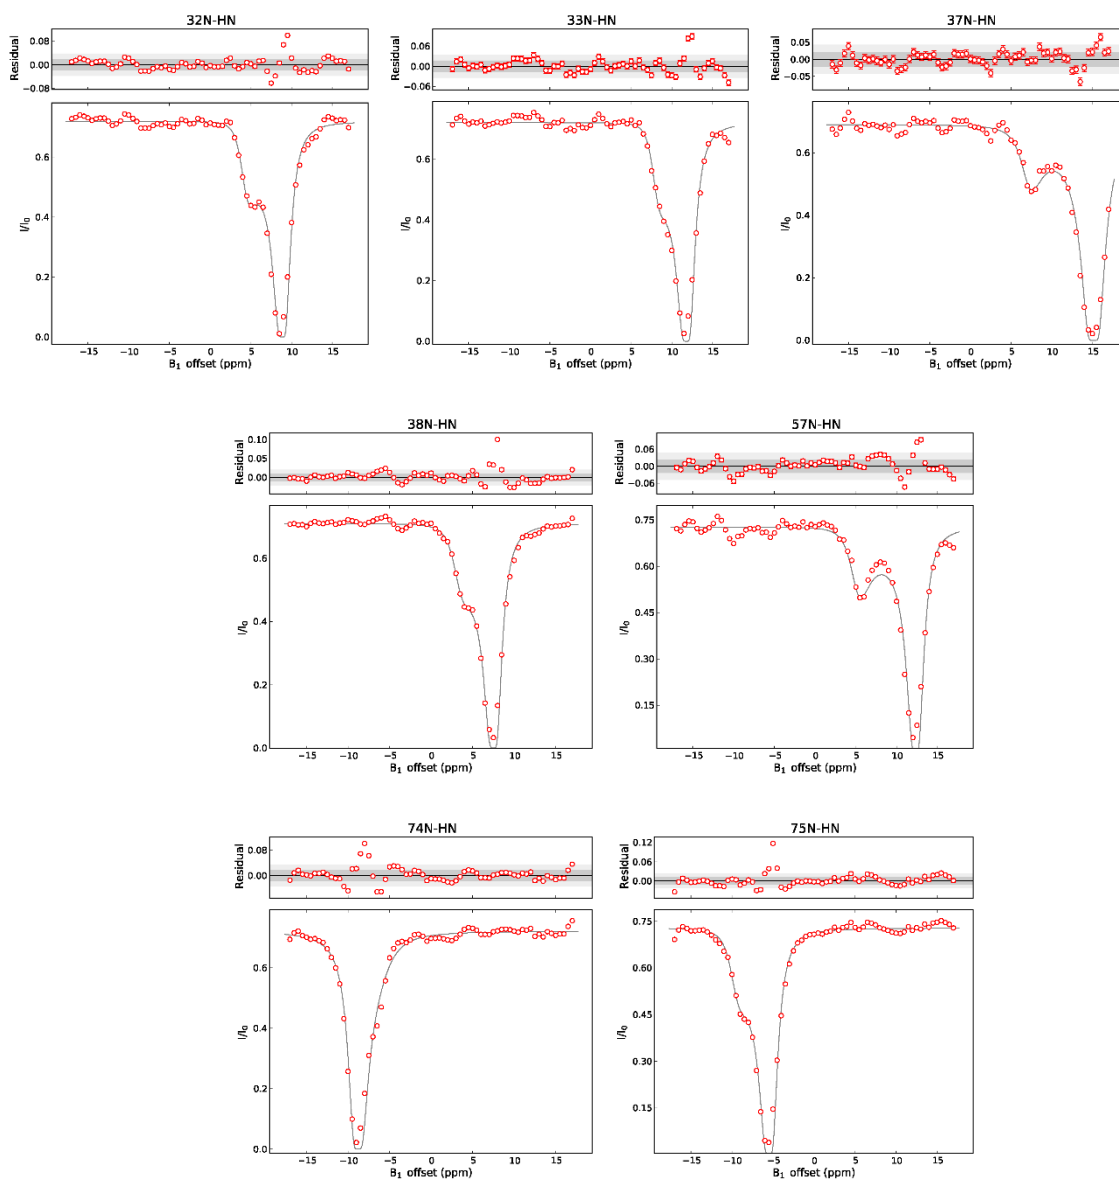

**Figure S7** Plot of the fits of  $^{15}\text{N}$ -CEST experiments of G12D K-Ras- $\text{Mg}^{2+}$ ·GDP. Numerical results of the fits are shown in Table S5.

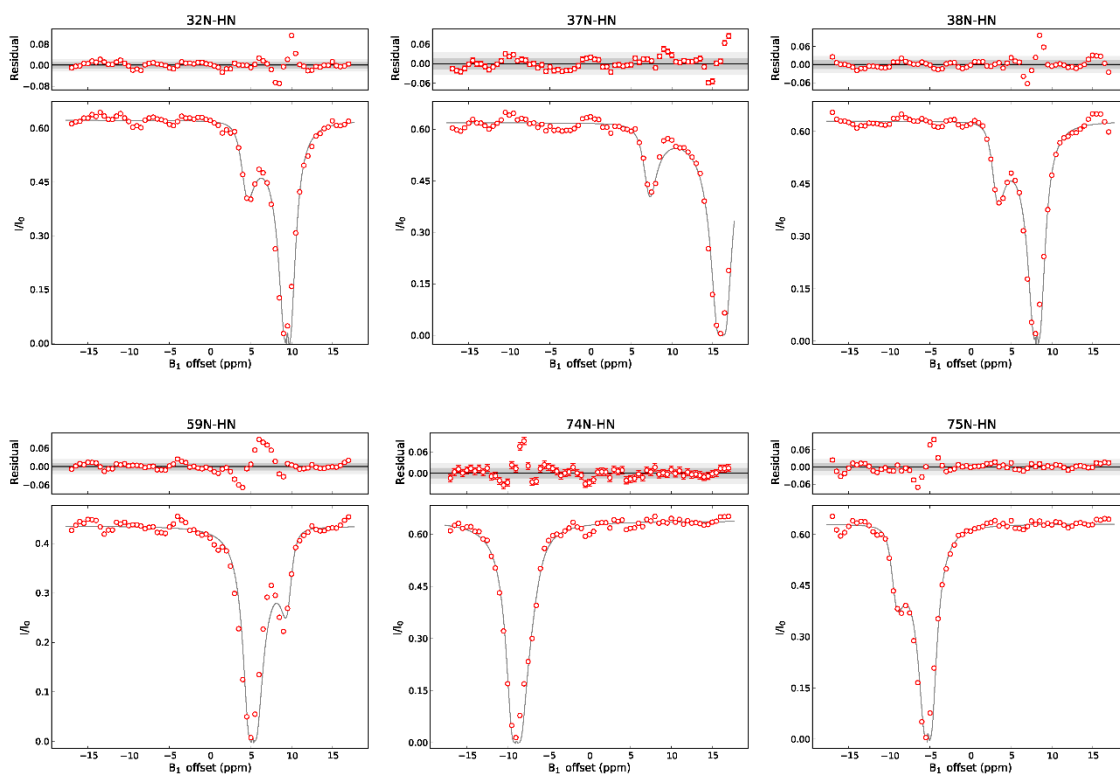

**Figure S8** Plot of the fits of  $^{15}\text{N}$ -CEST experiments of G12V K-Ras·Mg $^{2+}$ ·GDP. Numerical results of the fits are shown in Table S5.



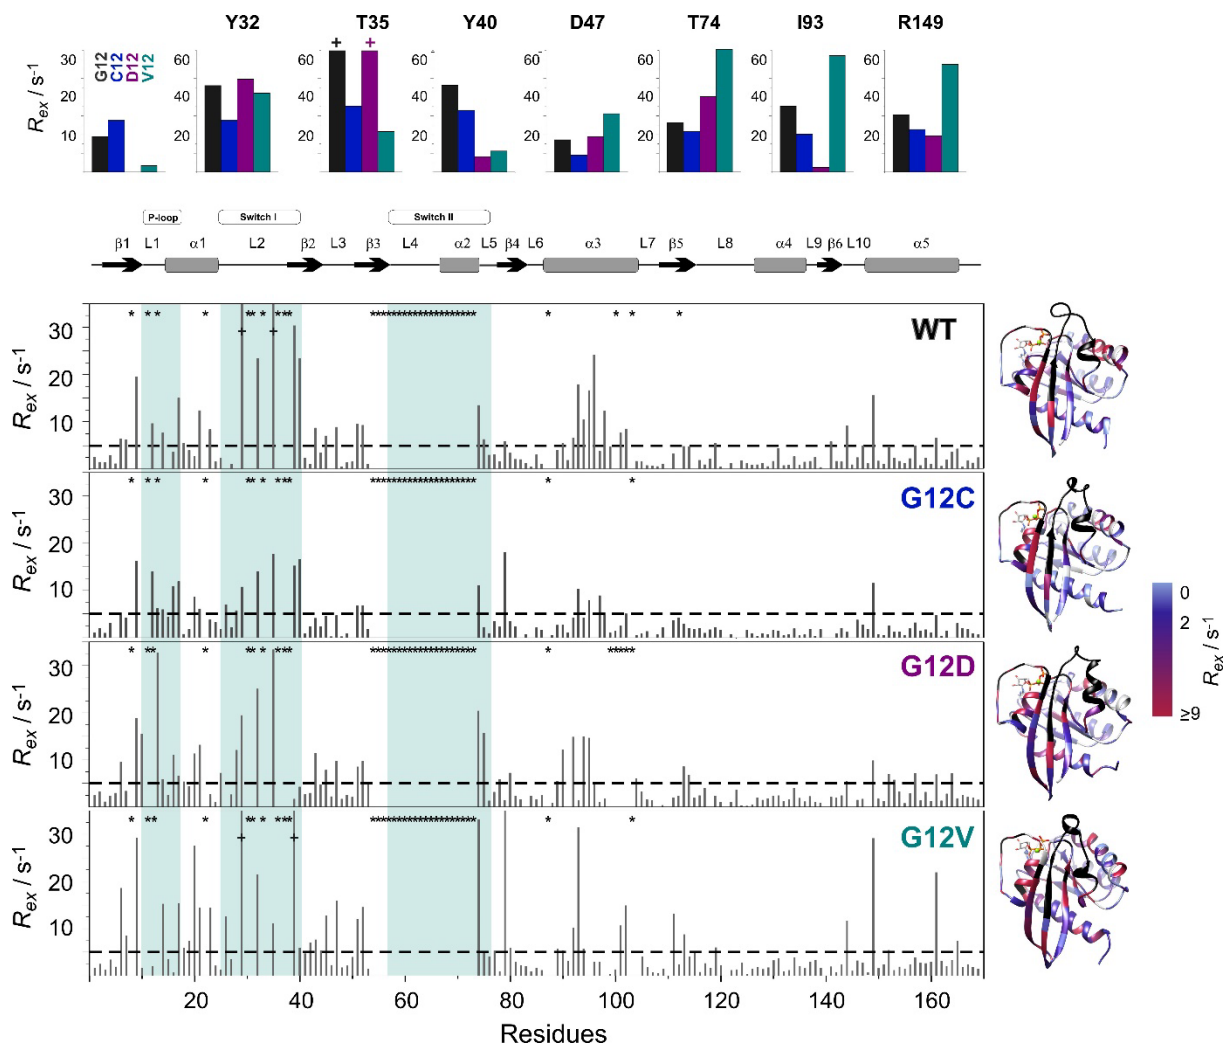

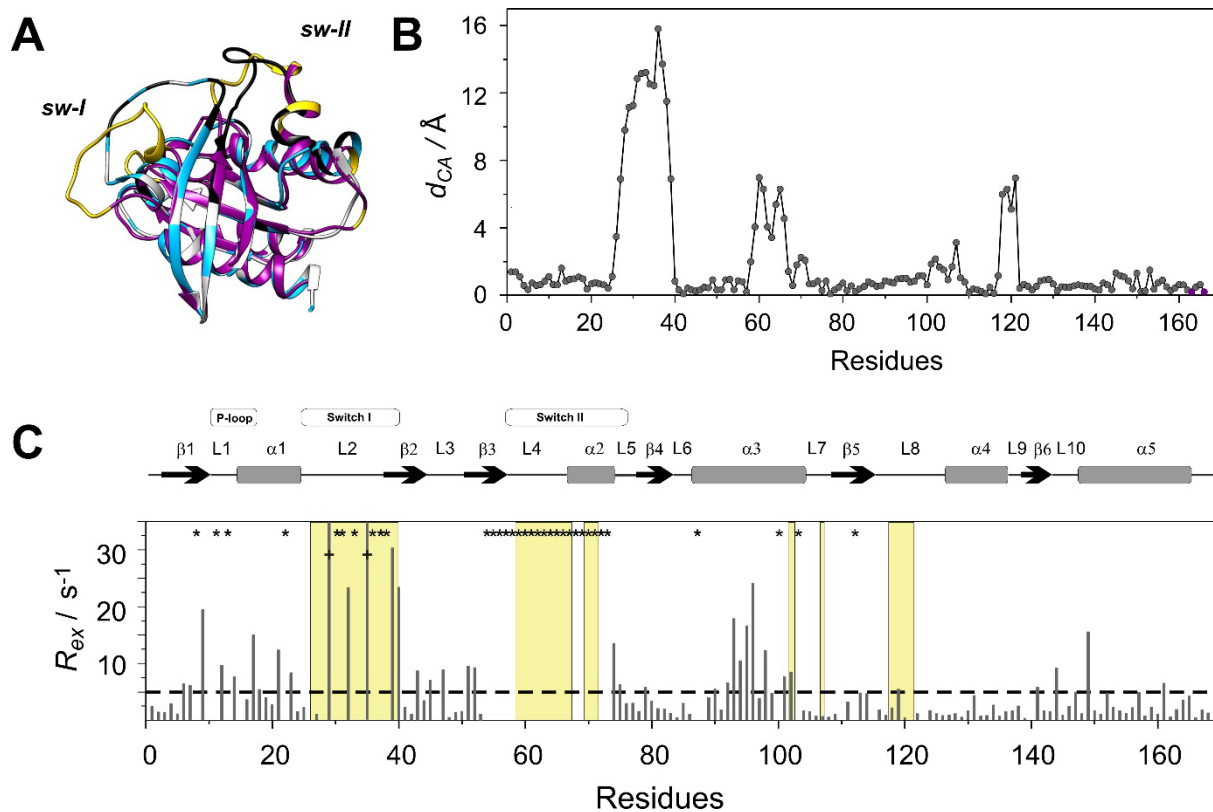

**Figure S10** (A) Superimposed structures of K-Ras·Mg<sup>2+</sup>·GTP (grey) and the nucleotide free H-Ras·Sos complex (PDB: 1BKD, magenta). Regions displaying C<sup>α</sup> positional differences larger than 2 Å between the two complexes are highlighted in yellow. Residues exhibiting a contribution to transverse relaxation of  $R_{ex} > 2$  Hz in K-Ras·Mg<sup>2+</sup>·GTP are depicted in blue. (B) C<sup>α</sup> positional differences between K-Ras·Mg<sup>2+</sup>·GTP and H-Ras·Sos along the amino acid sequence. (C) Values of <sup>15</sup>N  $R_{ex}$  (at 800 MHz for <sup>1</sup>H) of <sup>15</sup>N-labeled wild-type K-Ras·Mg<sup>2+</sup>·GTP (25 °C, pH=7.4) as a function of amino acid sequence.  $R_{ex}$  is estimated from the difference in  $R_{2,eff}$  at the lowest and highest  $\nu_{CPMG}$  values. Residues exhibiting  $R_{ex} > 35$  s<sup>-1</sup> are marked with a + sign. Unassignable residues due to severe line broadening are marked with an asterisk. Secondary structural elements are indicated at the top. Regions displaying  $d_{CA} > 2$  Å in (B) are shown in a yellow background.

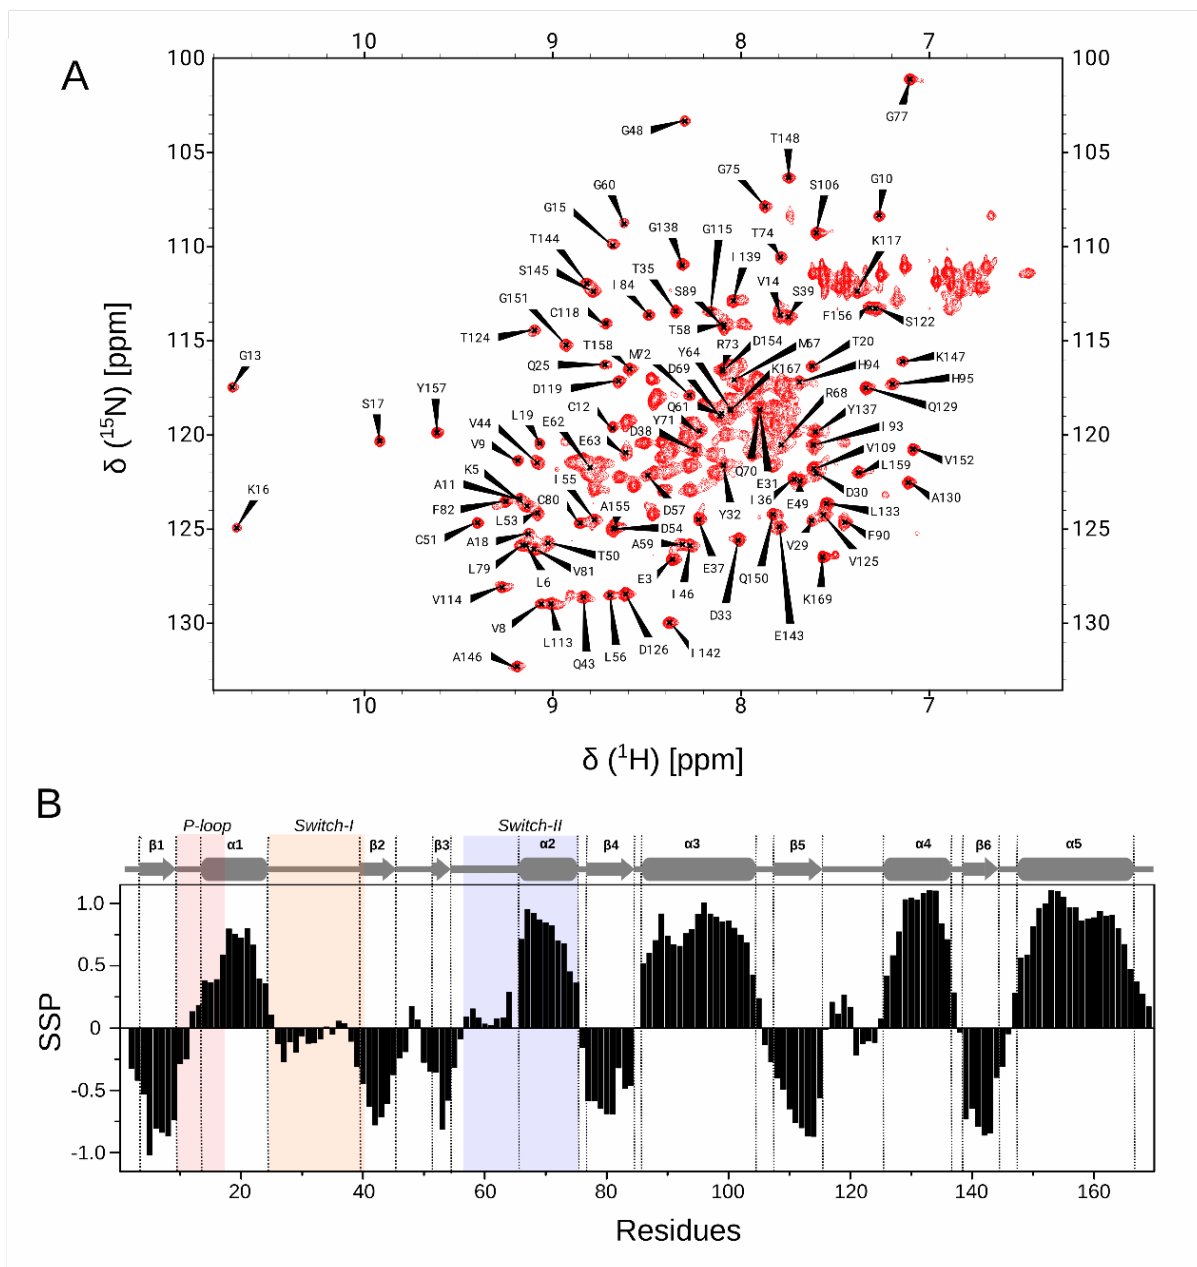

**Figure S11** (A) Assigned  $^1\text{H},^{15}\text{N}$ -HSQC spectrum of  $\text{Mg}^{2+}$ -free G12C K-Ras:GDP. The assignments are shown partially, with the full assignment deposited in BMRB, access number: 50774. (B) Secondary structure propensities (SSP) of  $\text{Mg}^{2+}$ -free G12C K-Ras. Secondary structure elements are drawn at the top. Regions of the P-loop (light red, residues 10-17), switch-I (orange, residues 25-40), and switch-II (light blue, residues 57-75) are highlighted.

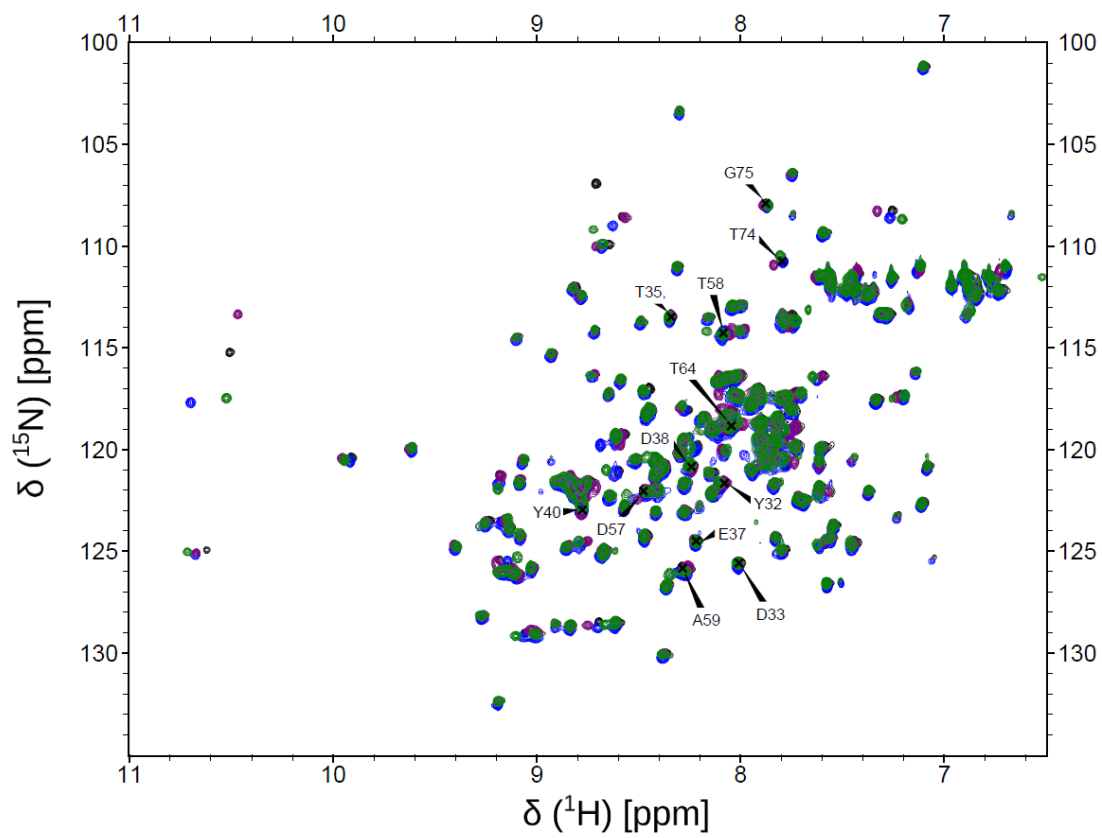

**Figure S12** Overlaid  $^1\text{H},^{15}\text{N}$ -HSQC spectra of GDP-bound  $\text{Mg}^{2+}$ -free wt (black), G12C (blue), G12D (purple), and G12V (green) K-Ras. The assignment of the CEST-active residues are shown.

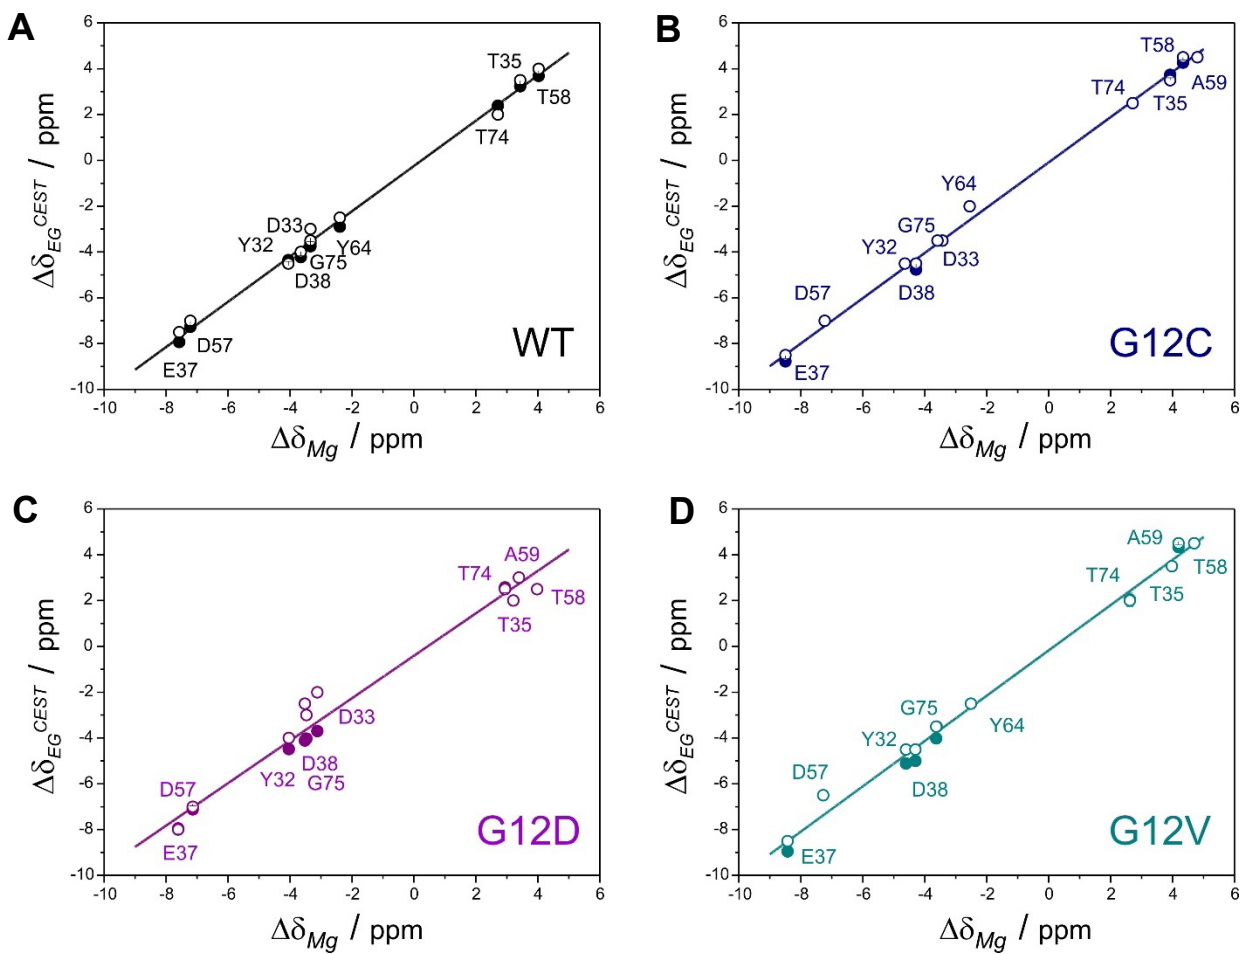

**Figure S13** Correlation between  $^{15}\text{N}$  backbone chemical shift differences derived from CEST measurements ( $\Delta\delta_{\text{EG}}^{\text{CEST}}$ ) and those detected between the  $\text{Mg}^{2+}$ -bound and  $\text{Mg}^{2+}$ -free forms ( $\Delta\delta_{\text{Mg}}$ ) in (A) wt, (B) G12C, (C) G12D, and (D) G12V K-Ras-GDP. Fitted and estimated (based on the difference between the two minima of the CEST-curve) values of  $|\Delta\delta_{\text{EG}}|$  are depicted in closed and empty circles, respectively.

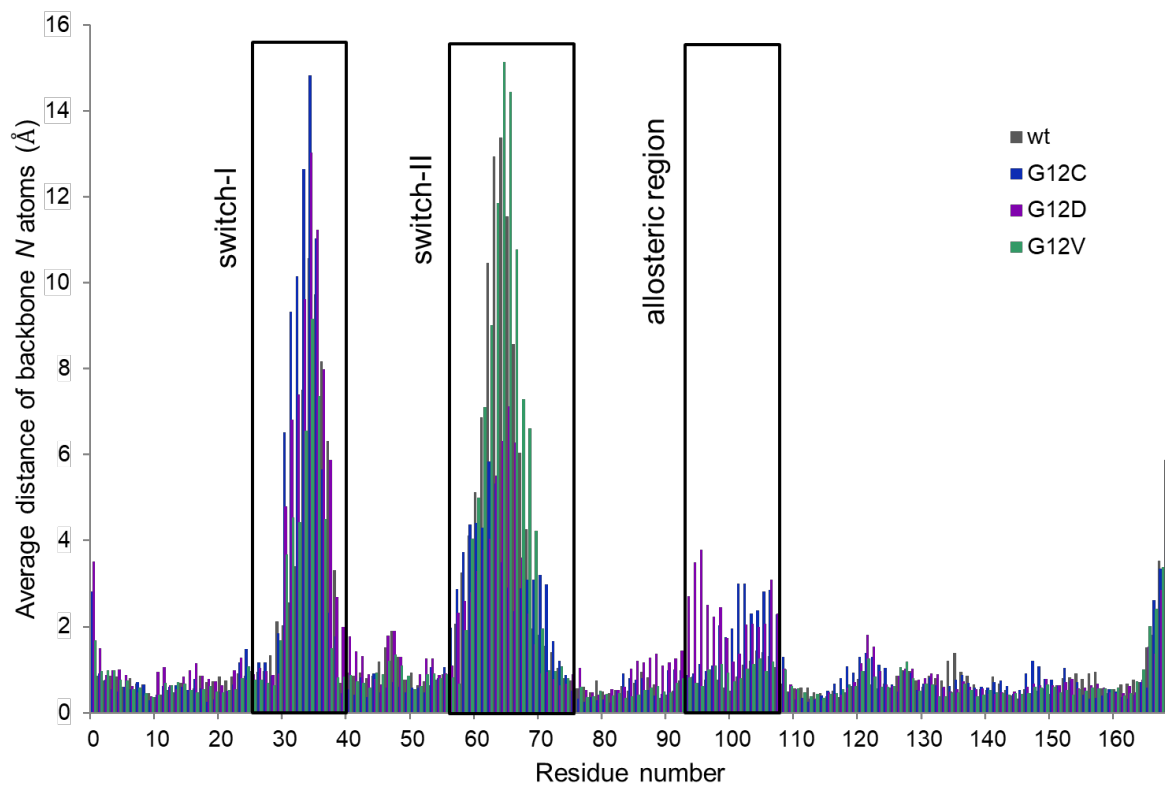

**Figure S14** Average deviation (in Å) of backbone amide *N* atoms between the GDP-bound  $Mg^{2+}$ -loaded and  $Mg^{2+}$ -free forms by MD simulations along the sequence for K-Ras-wt (black), G12C (blue), G12D (purple), and G12V (green) variants.

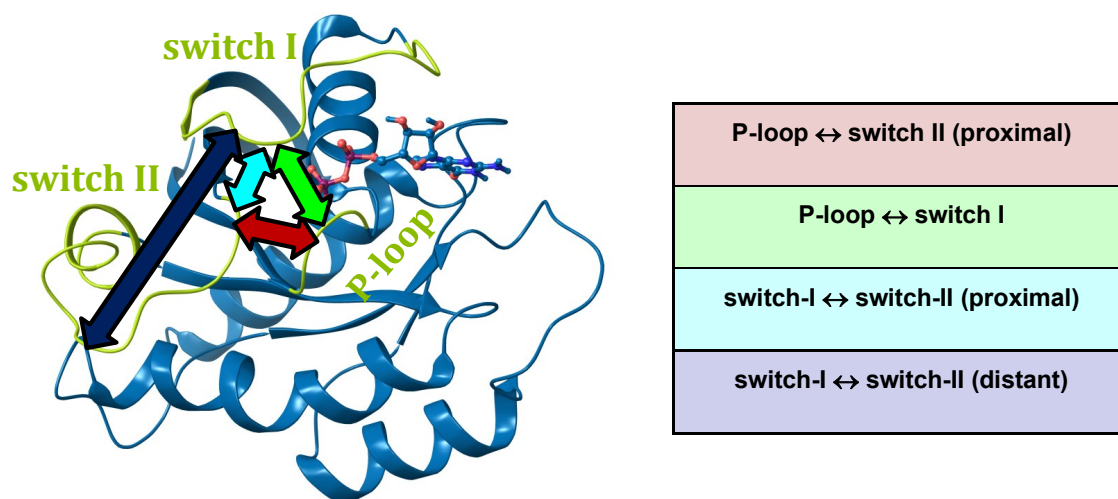

| C <sup>α</sup> -C <sup>α</sup> distance (Å) | wt + Mg <sup>2+</sup> | G12C + Mg <sup>2+</sup> | G12D + Mg <sup>2+</sup> | G12V + Mg <sup>2+</sup> | WT no Mg <sup>2+</sup> | G12C no Mg <sup>2+</sup> | G12D no Mg <sup>2+</sup> | G12V no Mg <sup>2+</sup> | GEF-complex (no Mg <sup>2+</sup> , no GDP) crystal structure |
|---------------------------------------------|-----------------------|-------------------------|-------------------------|-------------------------|------------------------|--------------------------|--------------------------|--------------------------|--------------------------------------------------------------|
| X12-A59                                     | 7.1±0.5               | 6.8±0.5                 | 7.9±0.6                 | 7.2±0.5                 | 6.2±0.4                | 6.1±0.3                  | 7.5±0.3                  | 5.9±0.3                  | 7.1                                                          |
| X12-G60                                     | 7.3±1.2               | 4.5±0.5                 | 7.5±1.1                 | 5.3±0.9                 | 9.4±0.4                | 8.8±0.3                  | 4.1±0.3                  | 9.4±0.4                  | 7.6                                                          |
| X12-Q61                                     | 8.1±1.1               | 7.1±0.8                 | 8.3±1.4                 | 8.4±1.4                 | 12.1±1.0               | 10.2±0.4                 | 5.5±0.5                  | 11.1±0.8                 | 8.3                                                          |
| X12-P34                                     | 7.4±0.6               | 6.9±0.7                 | 9.3±1.2                 | 9.3±0.8                 | 14.6±0.8               | 18.7±0.8                 | 17.4±0.9                 | 15.9±1.1                 | 18.8                                                         |
| X12-T35                                     | 9.0±0.6               | 8.8±0.5                 | 11.3±1.5                | 11.2±0.7                | 18.4±0.8               | 20.6±0.7                 | 20.7±0.9                 | 19.1±1.0                 | 21.0                                                         |
| T35-A59                                     | 5.4±0.5               | 5.6±0.7                 | 5.9±1.2                 | 6.2±0.8                 | 17.0±0.8               | 20.4±0.6                 | 17.6±1.1                 | 17.6±0.9                 | 14.4                                                         |
| T35-G60                                     | 7.2±1.0               | 7.8±0.8                 | 8.6±1.2                 | 9.2±0.9                 | 18.9±1.0               | 22.7±0.7                 | 19.9±1.0                 | 19.3±0.9                 | 14.8                                                         |
| T35-Q61                                     | 10.2±0.9              | 10.1±1.3                | 8.9±1.9                 | 10.0±1.3                | 18.3±1.3               | 26.5±0.7                 | 21.3±1.2                 | 18.2±1.4                 | 16.1                                                         |
| T35-E63                                     | 16.1±1.0              | 14.0±1.8                | 15.1±1.8                | 13.8±1.2                | 16.9±2.1               | 30.7±0.8                 | 23.3±1.3                 | 15.8±2.4                 | 21.4                                                         |
| T35-Y64                                     | 17.4±1.0              | 14.6±1.3                | 17.1±1.4                | 15.7±1.1                | 15.9±1.4               | 29.1±0.9                 | 22.6±1.4                 | 13.6±2.7                 | 20.8                                                         |

**Figure S15** Loosening of the overall structure of K-Ras proteins upon Mg<sup>2+</sup> release – seen in the MD simulations. The table shows the distance of the C<sup>α</sup> atoms of selected residue-pairs in the MD simulations and in the crystal structure of the GEF-bound nucleotide- and Mg<sup>2+</sup>-free wt H-Ras (PDB code: 1XD2<sup>[4]</sup>).

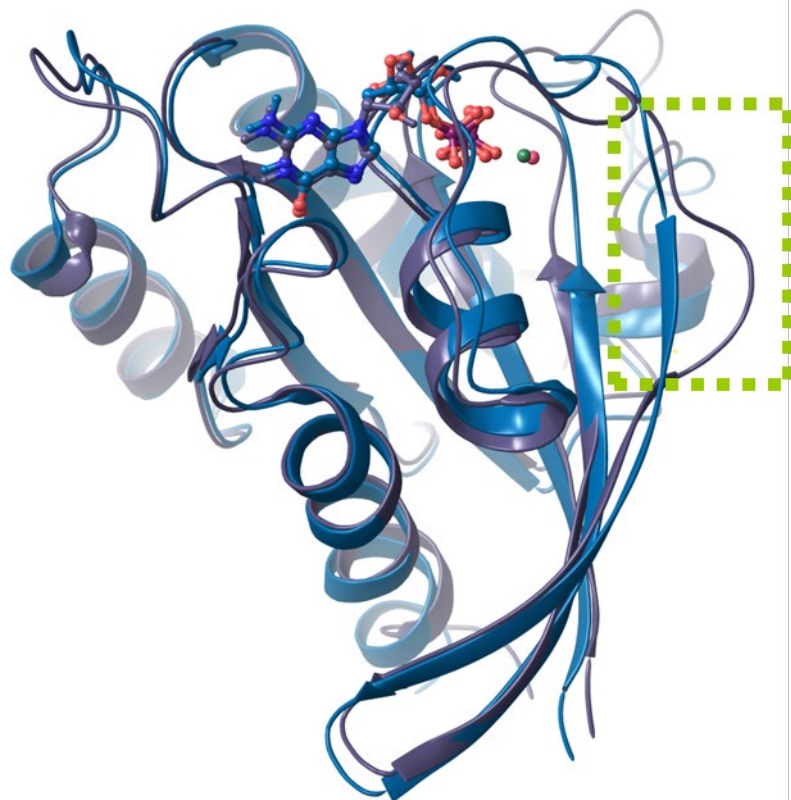

| C <sup>α</sup> -C <sup>α</sup><br>distance (Å) | wt      | G12C    | G12D    | G12V     | wt<br>no Mg <sup>2+</sup> | G12C<br>no Mg <sup>2+</sup> | G12D<br>no Mg <sup>2+</sup> | G12V<br>no Mg <sup>2+</sup> | GEF-complex<br>(no Mg <sup>2+</sup> , no GDP)<br>crystal structure |
|------------------------------------------------|---------|---------|---------|----------|---------------------------|-----------------------------|-----------------------------|-----------------------------|--------------------------------------------------------------------|
| I36-A59                                        | 6.2±0.5 | 6.5±0.7 | 6.1±0.5 | 8.6±0.7  | 16.2±0.7                  | 17.5±0.5                    | 16.0±1.0                    | 16.1±1.1                    | 16.6                                                               |
| E37-T58                                        | 4.7±0.4 | 5.2±0.3 | 4.7±0.5 | 10.4±1.1 | 12.9±0.8                  | 11.1±0.4                    | 13.2±1.7                    | 13.1±0.8                    | 15.2                                                               |
| D38-D57                                        | 5.2±0.3 | 5.2±0.2 | 5.2±0.2 | 9.9±0.5  | 9.7±0.5                   | 7.2±0.3                     | 10.1±0.8                    | 10.0±0.7                    | 12.2                                                               |
| H bonds                                        | 9.6     | 9.3     | 9.7     | 7.9      | 7.9                       | 8.1                         | 7.4                         | 7.8                         | 7                                                                  |

**Figure S16** Shortening of the  $\beta 2/\beta 3$  strands – as seen in the MD simulations. In the MD-derived average structure, GDP-bound KRas-wt is blue, while G12V is purple. The shortened  $\beta 2/\beta 3$  strands are shown in the light green rectangle. The table shows the distance of C<sup>α</sup> atoms of the 3 outermost H-bonding residue pairs between  $\beta 2$  and  $\beta 3$ , and the total number of H-bonds formed between the two strands in the simulations.



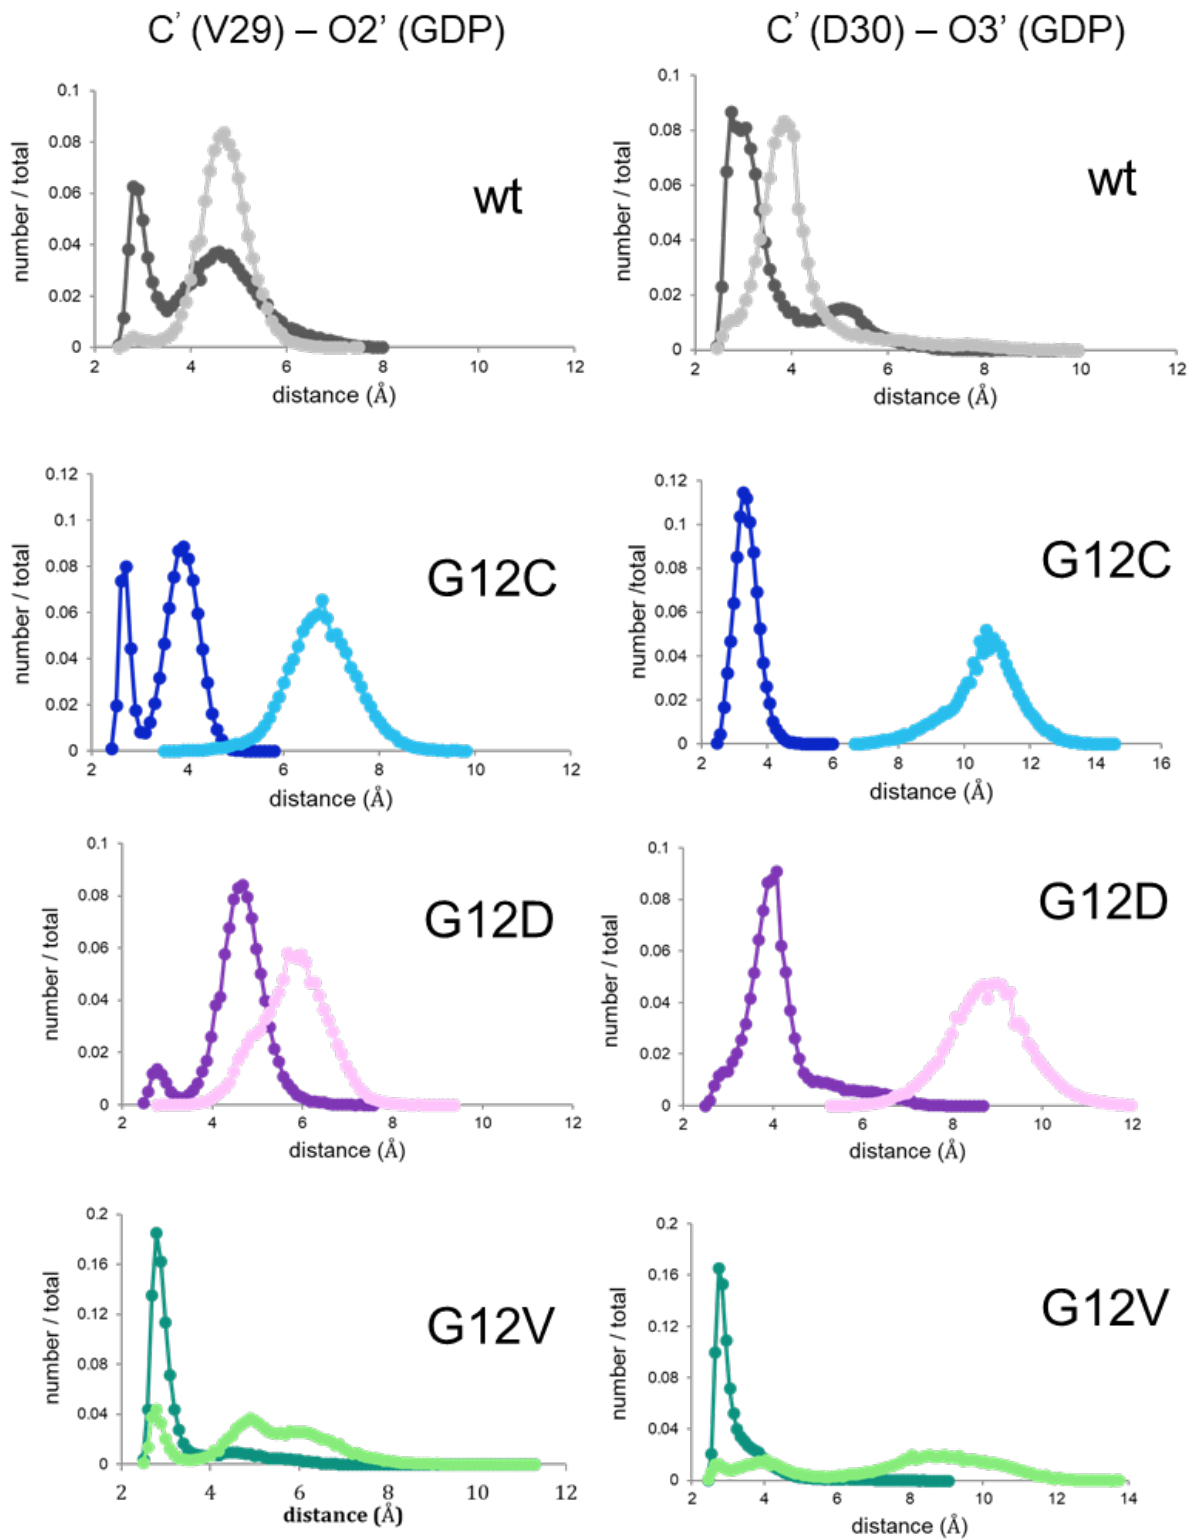

**Figure S17** Weakened association between the sugar ring of GDP and the V29 and D30 residues of switch-I as seen in the MD simulations of GDP-bound K-Ras-wt (grey), G12C (blue), G12D (purple), G12V (green) in the Mg<sup>2+</sup>-bound (dark colors) and Mg<sup>2+</sup>-free states (light colors). The distribution of the distances between O2' (in case of V29) and O3' (in case of D30) of the GDP and C' (carbonyl) of the residue are shown for each simulation.

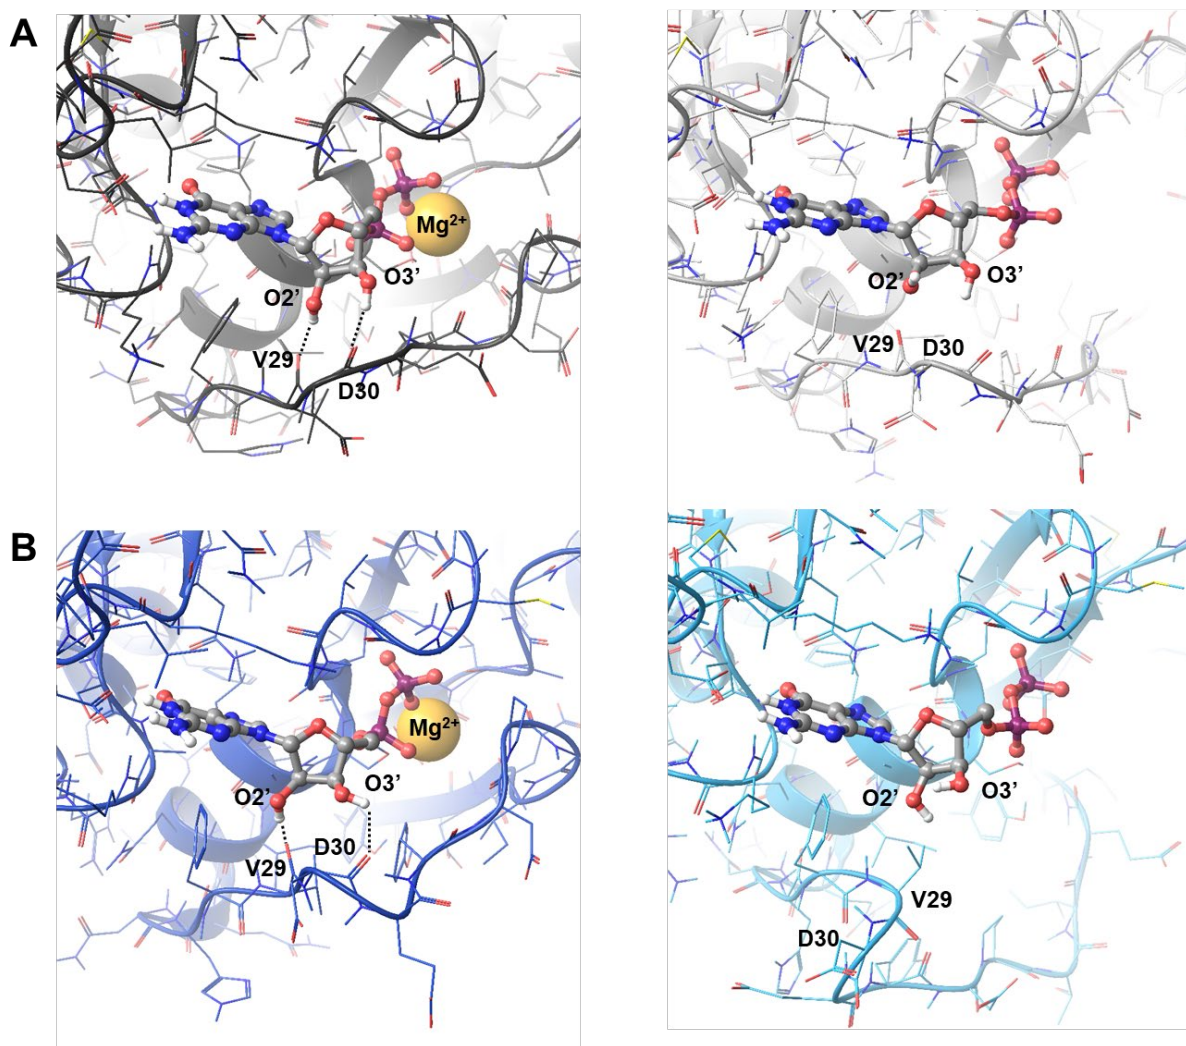

**Figure S18** Two examples for the changes illustrated on Figure S17. **(A)** In case of GDP-bound K-Ras-wt moderate changes are caused by  $Mg^{2+}$  loss in the interaction between the sugar ring of GDP and switch-I ( $Mg^{2+}$ -bound and  $Mg^{2+}$ -free form are shown in dark grey and light grey, respectively), while **(B)** in case of the GDP-bound G12C variant the changes are more striking ( $Mg^{2+}$ -bound and  $Mg^{2+}$ -free form are shown in dark blue and light blue, respectively). Each simulation is represented by the mid-structures of the most populated cluster.

## References

- [1] G. Pálffy, I. Vida, A. Perczel, *Biomol. NMR Assign.* **2020**, *14*(1), 1-7.
- [2] D. K. Menyhárd, G. Pálffy, Z. Orgován, I. Vida, G. M. Keserű, A. Perczel, *Chem. Sci.* **2020**, *11*, 9272-9289
- [3] Y. Ito, K. Yamasaki, J. Iwahara, T. Terada, A. Kamiya, M. Shirouzu, Y. Muto, G. Kawai, S. Yokoyama, E. D. Laue, M. Wälchli, T. Shibata, S. Nishimura, T. Miyazawa, *Biochemistry* **1997**, *36*(30), 9109-9119
- [4] H. Sonderrmann, S. M. Soisson, S. Boykevich, S. S. Yang, D. Bar-Sagi, J. Kuriyan, *Cell* (**2004**) *119*, 393-405
